# Supplementary material
Source: Royal Society of Chemistry journal article supplement (doi:10.1039/d6cc00960c)
Supplement: d6cc00960c1.pdf [file d6cc00960c1.pdf]

## *Supporting Information*

for

### **Catalyst-Free Synthesis of $\alpha$ -Carboline Derivatives via Chromone**

#### **Skeleton Remodeling**

Wenting Fu,<sup>a†</sup> Sifeng Li,<sup>b†</sup> Peng Li,<sup>b†</sup> Bin Cheng,<sup>ab\*</sup> Wenjun Zhang,<sup>a</sup> Ying Zhang,<sup>b</sup> Kang Zhou,<sup>b</sup> Taimin Wang,<sup>ab\*</sup> Hongbin Zhai,<sup>c</sup> and Dezhi Yang<sup>a\*</sup>

<sup>a</sup>China School of Pharmacy, Zunyi Medical University, Zunyi 563000, China; e-mail: lpydz@163.com

<sup>b</sup>Department of Undergraduate Education-School of Food and Drug, Shenzhen Polytechnic University, Shenzhen 518000, China; e-mail: chengbin@szpt.edu.cn, wangtm@szpt.edu.cn

<sup>c</sup>State Key Laboratory of Chemical Oncogenomics, School of Chemical Biology and Biotechnology, Shenzhen Graduate School of Peking University, Shenzhen 518055, China

<sup>†</sup>These authors contributed equally to this work

#### **Table of Contents**

|                                                                  |            |
|------------------------------------------------------------------|------------|
| <b>1. General Information</b> .....                              | <b>S2</b>  |
| <b>2. Experimental Procedures</b> .....                          | <b>S2</b>  |
| <b>3. Table S1 Optimization of the Reaction Conditions</b> ..... | <b>S5</b>  |
| <b>4. Characterization Data</b> .....                            | <b>S6</b>  |
| <b>5. NMR Spectra</b> .....                                      | <b>S16</b> |
| <b>6. HRMS Spectra</b> .....                                     | <b>S49</b> |
| <b>7. X-ray Crystal Structure Information</b> .....              | <b>S65</b> |
| <b>8. References</b> .....                                       | <b>S72</b> |

## 1. General Information

All isolated compounds were characterized on Bruker 500 MHz and JEOL 400 MHz spectrometer in CDCl<sub>3</sub>. Chemical shifts were reported as  $\delta$  values relative to internal CHCl<sub>3</sub> ( $\delta$  7.26 for <sup>1</sup>H NMR and  $\delta$  77.2 for <sup>13</sup>C NMR). <sup>19</sup>F NMR spectra were recorded on a JEOL 400 MHz spectrometer. High-resolution mass spectra (HRMS) were recorded on a ZenoTOF 7600 system (SCIEX, Concord, ON, Canada) with information dependent acquisition (IDA) mode. All melting points were measured with the samples after column chromatography and uncorrected. Column chromatography was performed on silica gel. All solvents and reagents were used as obtained from commercial sources without further purification. The reactants indolin-2-imines and 3-formylchromones were prepared according to the literature procedures<sup>[1]</sup>.

## 2. Experimental Procedures

### 2.1 General Procedure for the Synthesis of 3

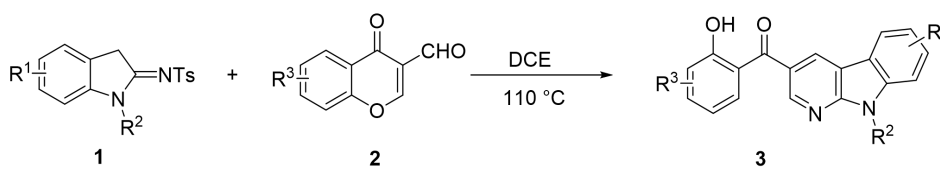

To a 25-mL glass vial equipped with a magnetic stir bar were successively added indolin-2-imines **1** (0.3 mmol, 1.5 equiv), 3-formylchromones **2** (0.2 mmol), and DCE (1 mL). The mixture was stirred at 110 °C for 2–23 h. After TLC indicated the complete consumption of 3-formylchromones **2**, the resulting mixture was concentrated in vacuo. The residue was purified by column chromatography (PE/EtOAc = 40:1 to 30:1) to afford the target product **3**.

### 2.2 Scale-Up Experiment for the Synthesis of 3aa.

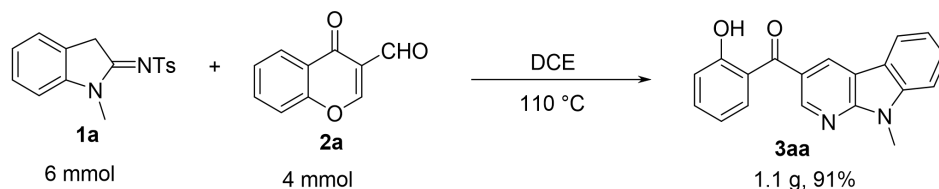

A mixture of **1a** (1.8 g, 6.0 mmol, 1.5 equiv), **2a** (697 mg, 4.00 mmol, 1.0 equiv) in DCE (20 mL) was stirred at 110 °C for 20 h. After TLC indicated the complete consumption of **2a**, the resulting mixture was concentrated in vacuo. The residue was purified by column chromatography (PE/EtOAc = 30:1) to afford the target product **3aa** (1.1 g, 91%).

### 2.3 Procedure for the Synthesis of **6**<sup>[2]</sup>

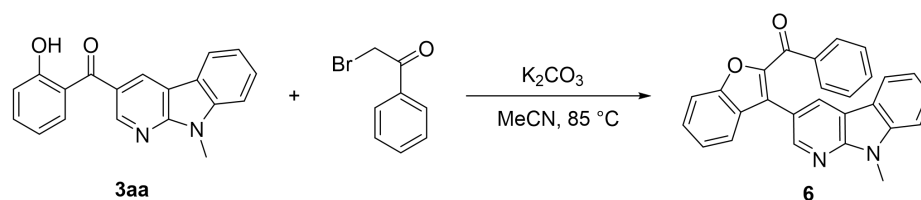

To a 25-mL glass vial equipped with a magnetic stir bar were successively added **3aa** (91 mg, 0.3 mmol), 2-bromoacetophenone (60 mg, 0.3 mmol, 1.0 equiv),  $K_2CO_3$  (41 mg, 1.0 equiv), and MeCN (3 mL). After the mixture was stirred at  $85\text{ }^\circ\text{C}$  for 6 h, it was concentrated in vacuo and the residue was dissolved in EtOAc and washed with water. The EtOAc layer was dried over anhydrous  $Na_2SO_4$ , filtered, concentrated, and the resulting residue was purified by column chromatography (PE/EtOAc = 15:1) to afford the target product **6** (114 mg, 94%).

### 2.4 Procedure for the Synthesis of **7**<sup>[3]</sup>

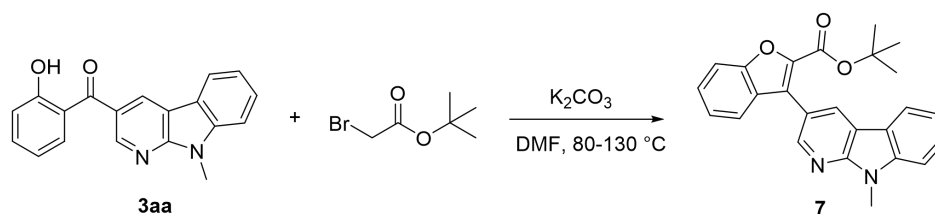

To a 25-mL glass vial equipped with a magnetic stir bar were successively added **3aa** (30 mg, 0.1 mmol), *tert*-butyl 2-bromoacetate (19  $\mu\text{L}$ , 0.13 mmol, 1.3 equiv),  $K_2CO_3$  (28 mg, 2.0 equiv), and DMF (1 mL). After the mixture was stirred at  $80\text{ }^\circ\text{C}$  for 0.5 h and then heated up to  $130\text{ }^\circ\text{C}$  for 2 h, it was quenched with water and extracted with EtOAc. The combined EtOAc layers were dried over anhydrous  $Na_2SO_4$ , filtered and concentrated in vacuo. The residue was purified by column chromatography (PE/EtOAc = 12:1) to afford the target product **7** (33 mg, 83%).

### 2.4 Procedure for the Synthesis of **8**<sup>[4]</sup>

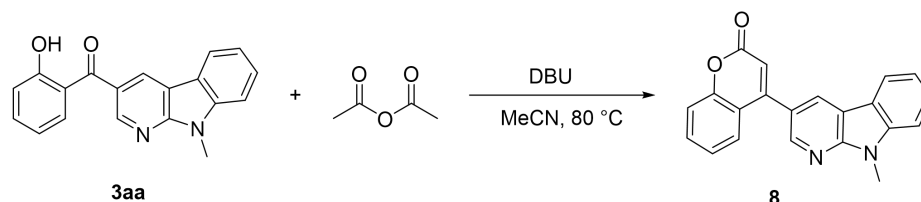

To a 25-mL glass vial equipped with a magnetic stir bar were successively added **3aa** (30 mg, 0.1 mmol), acetic anhydride (18  $\mu\text{L}$ , 0.2 mmol, 2.0 equiv), DBU (45  $\mu\text{L}$ , 3.0 equiv), and MeCN (2 mL). After the mixture was stirred at  $80\text{ }^\circ\text{C}$  for 0.5 h, it was concentrated in vacuo. The residue was purified

---

by column chromatography (PE/EtOAc = 5:1) to afford the target product **8** (24 mg, 73%).

## 2.6 Procedure for the Synthesis of **9**<sup>[5]</sup>

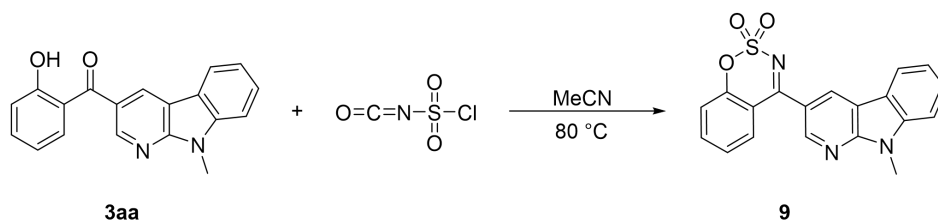

To a 25-mL glass vial equipped with a magnetic stir bar were successively added **3aa** (30 mg, 0.1 mmol), chlorosulfonyl isocyanate (35  $\mu$ L, 0.4 mmol, 4.0 equiv), and anhydrous MeCN (1 mL). After the mixture was stirred at 80 °C for 0.5 h under nitrogen atmosphere, it was quenched with water and extracted with EtOAc. The combined EtOAc layers were dried over anhydrous Na<sub>2</sub>SO<sub>4</sub>, filtered and concentrated in vacuo. The residue was purified by column chromatography (PE/EtOAc = 4:1) to afford the target product **9** (22 mg, 61%).

### 3. Table S1 Optimization of the Reaction Conditions <sup>a</sup>

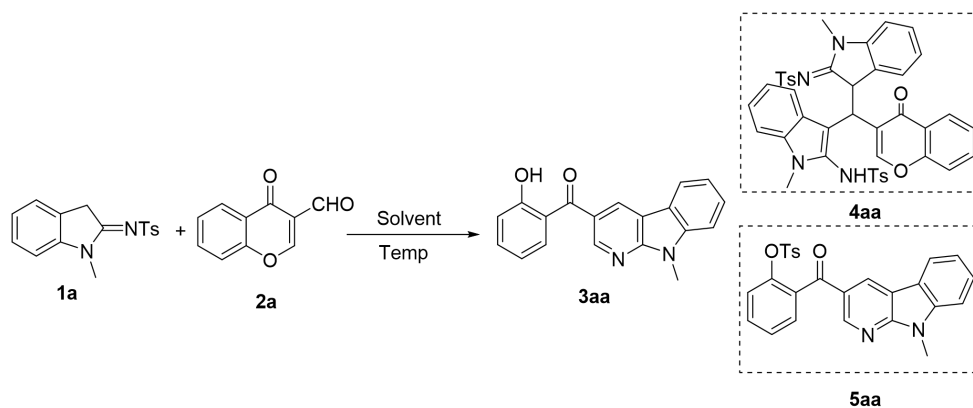

| Entry                 | Base               | Additive          | Temp (°C)  | Solvent           | Time (h)  | Yield (%) <sup>b</sup> |                 |                 |
|-----------------------|--------------------|-------------------|------------|-------------------|-----------|------------------------|-----------------|-----------------|
|                       |                    |                   |            |                   |           | <b>3aa</b>             | <b>4aa</b>      | <b>5aa</b>      |
| 1 <sup>d</sup>        | NaHCO <sub>3</sub> | ZnCl <sub>2</sub> | 60         | DCM               | 19        | 10 <sup>c</sup>        | 10 <sup>c</sup> | ND              |
| 2 <sup>e</sup>        | -                  | ZnCl <sub>2</sub> | 25 to 60   | DCM               | 35        | 34 <sup>c</sup>        | 2 <sup>c</sup>  | 30 <sup>c</sup> |
| 3 <sup>f</sup>        | Py                 | -                 | 85 to 110  | DCE               | 9         | 67 <sup>c</sup>        | ND              | ND              |
| 4                     | -                  | -                 | 110        | DCE               | 17        | 93 <sup>c</sup>        | ND              | ND              |
| 5                     | -                  | -                 | 110        | MeCN              | 2         | 87                     | ND              | ND              |
| 6                     | -                  | -                 | 110        | Acetone           | 2         | 80                     | ND              | ND              |
| 7                     | -                  | -                 | 110        | THF               | 10        | 88                     | ND              | ND              |
| 8                     | -                  | -                 | 110        | CHCl <sub>3</sub> | 23        | 89                     | ND              | ND              |
| 9                     | -                  | -                 | 110        | EtOAc             | 10        | 68                     | ND              | ND              |
| 10                    | -                  | -                 | 110        | Dioxane           | 23        | 69                     | ND              | ND              |
| 11                    | -                  | -                 | 110        | EtOH              | 2         | 92 <sup>c</sup>        | ND              | ND              |
| 12                    | -                  | -                 | 110        | DMF               | 1         | 94 <sup>c</sup>        | ND              | ND              |
| 13 <sup>g</sup>       | -                  | -                 | 110        | DCE               | 48        | 90                     | ND              | ND              |
| 14 <sup>h</sup>       | -                  | -                 | 110        | DCE               | 48        | 83                     | ND              | ND              |
| 15                    | -                  | -                 | 85         | DCE               | 48        | 28                     | ND              | ND              |
| 16 <sup>i</sup>       | -                  | -                 | 110        | DCE               | 29        | 95 <sup>c</sup>        | ND              | ND              |
| <b>17<sup>j</sup></b> | -                  | -                 | <b>110</b> | <b>DCE</b>        | <b>13</b> | <b>97<sup>c</sup></b>  | ND              | ND              |

<sup>a</sup>Unless otherwise noted, the reaction was conducted with **1a** (0.3 mmol, 1.5 equiv), **2a** (0.2 mmol), solvent (2 mL) in air. <sup>b</sup>Yield was determined by <sup>1</sup>H-NMR using 1,3,5-trimethoxybenzene as the internal standard. <sup>c</sup>Isolated yield. <sup>d</sup>NaHCO<sub>3</sub> (1.0 equiv), ZnCl<sub>2</sub> (0.1 equiv). <sup>e</sup>ZnCl<sub>2</sub> (0.5 equiv). <sup>f</sup>Py (2.0 equiv). <sup>g</sup>**1a** (0.26 mmol, 1.3 equiv), **2a** (0.2 mmol) was applied instead. <sup>h</sup>**1a** (0.24 mmol, 1.2 equiv), **2a** (0.2 mmol) was applied instead. <sup>i</sup>Solvent (3 mL) was applied instead. <sup>j</sup>Solvent (1 mL) was applied instead.

#### 4. Characterization Data

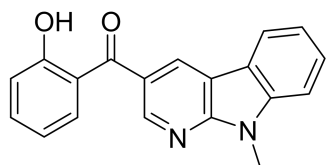

(2-Hydroxyphenyl)(9-methyl-9H-pyrido[2,3-*b*]indol-3-yl)methanone. Compound **3aa** (13 h, 58 mg, Yield = 97%,  $R_f$  = 0.56 (PE/EA = 3:1)) was isolated as a yellow oil.  $^1\text{H}$  NMR (500 MHz,  $\text{CDCl}_3$ )  $\delta$  11.98 (s, 1H), 8.86 (d,  $J$  = 2.0 Hz, 1H), 8.64 (d,  $J$  = 2.1 Hz, 1H), 8.07 (d,  $J$  = 7.8 Hz, 1H), 7.69 (dd,  $J$  = 8.0, 1.7 Hz, 1H), 7.58 (t,  $J$  = 7.7 Hz, 1H), 7.55–7.49 (m, 1H), 7.47 (d,  $J$  = 8.2 Hz, 1H), 7.34 (t,  $J$  = 7.5 Hz, 1H), 7.11 (d,  $J$  = 9.4 Hz, 1H), 6.92 (t,  $J$  = 7.6 Hz, 1H), 3.97 (s, 3H);  $^{13}\text{C}$  NMR (125 MHz,  $\text{CDCl}_3$ )  $\delta$  199.5, 163.0, 153.1, 148.3, 141.0, 136.2, 133.4, 129.6, 127.8, 125.3, 121.5, 121.1, 120.4, 119.7, 118.9, 118.5, 115.5, 109.7, 28.0; ESI-HRMS  $m/z$  calcd for  $\text{C}_{19}\text{H}_{15}\text{N}_2\text{O}_2$   $[\text{M} + \text{H}]^+$  303.1128 found 303.1128.

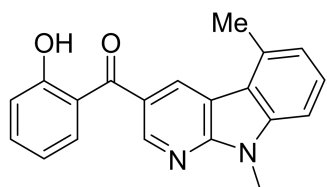

(5,9-Dimethyl-9H-pyrido[2,3-*b*]indol-3-yl)(2-hydroxyphenyl)methanone. Compound **3ab** (18 h, 44 mg, Yield = 70%,  $R_f$  = 0.49 (PE/EA = 3:1)) was isolated as a yellow solid; mp 188–189 °C.  $^1\text{H}$  NMR (500 MHz,  $\text{CDCl}_3$ )  $\delta$  12.00 (s, 1H), 8.87 (d,  $J$  = 2.0 Hz, 1H), 8.75 (d,  $J$  = 2.1 Hz, 1H), 7.72 (dd,  $J$  = 7.9, 1.7 Hz, 1H), 7.57–7.48 (m, 2H), 7.37 (d,  $J$  = 8.1 Hz, 1H), 7.15 (d,  $J$  = 7.3 Hz, 1H), 7.12 (d,  $J$  = 8.4 Hz, 1H), 6.96–6.91 (m, 1H), 4.01 (s, 3H), 2.85 (s, 3H);  $^{13}\text{C}$  NMR (125 MHz,  $\text{CDCl}_3$ )  $\delta$  199.7, 163.1, 153.1, 147.8, 141.1, 136.2, 134.7, 133.5, 131.4, 127.7, 125.4, 122.7, 119.8, 119.2, 118.9, 118.6, 116.3, 107.3, 28.1, 20.6; ESI-HRMS  $m/z$  calcd for  $\text{C}_{20}\text{H}_{17}\text{N}_2\text{O}_2$   $[\text{M} + \text{H}]^+$  317.1285, found 317.1285.

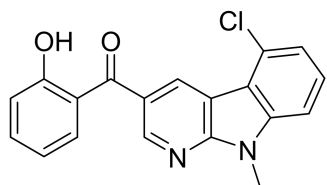

(5-Chloro-9-methyl-9H-pyrido[2,3-*b*]indol-3-yl)(2-hydroxyphenyl)methanone. Compound **3ac** (23 h, 50 mg, Yield = 75%,  $R_f$  = 0.38 (PE/EA = 3:1)) was isolated as a yellow solid; mp 181–182 °C.  $^1\text{H}$  NMR (500 MHz,  $\text{CDCl}_3$ )  $\delta$  12.00 (s, 1H), 9.10 (d,  $J$  = 2.1 Hz, 1H), 8.91 (d,  $J$  = 2.2 Hz, 1H), 7.70 (dd,  $J$  = 7.9, 1.7 Hz, 1H), 7.57–7.52 (m, 1H), 7.50 (t,  $J$  = 8.0 Hz, 1H), 7.41 (d,  $J$  = 8.1 Hz, 1H), 7.32 (d,  $J$  = 7.8 Hz, 1H), 7.12 (d,  $J$  = 9.5 Hz, 1H), 6.93 (t,  $J$  = 7.0 Hz, 1H), 4.02 (s, 3H);  $^{13}\text{C}$  NMR (125 MHz,  $\text{CDCl}_3$ )  $\delta$  199.5, 163.2, 152.9, 148.6, 142.0, 136.4, 133.4, 132.2, 129.9, 128.1, 125.9, 121.7, 119.7, 119.0, 118.7, 118.2, 114.6, 108.2, 28.3; ESI-HRMS  $m/z$  calcd for  $\text{C}_{19}\text{H}_{14}\text{ClN}_2\text{O}_2$   $[\text{M} + \text{H}]^+$  337.0738, found 337.0738.

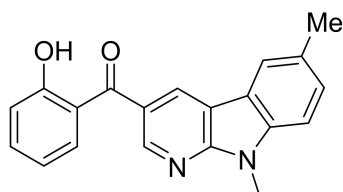

(6,9-Dimethyl-9*H*-pyrido[2,3-*b*]indol-3-yl)(2-hydroxyphenyl)methanone. Compound **3ad** (13 h, 59 mg, Yield = 94%,  $R_f = 0.47$  (PE/EA = 3:1)) was isolated as a yellow oil.  $^1\text{H}$  NMR (500 MHz,  $\text{CDCl}_3$ )  $\delta$  11.99 (s, 1H), 8.86 (d,  $J = 2.0$  Hz, 1H), 8.66 (d,  $J = 2.0$  Hz, 1H), 7.90 (s, 1H), 7.71 (dd,  $J = 8.0, 1.7$  Hz, 1H), 7.56–7.51 (m, 1H), 7.44–7.38 (m, 2H), 7.12 (d,  $J = 9.5$  Hz, 1H), 6.93 (t,  $J = 7.6$  Hz, 1H), 3.99 (s, 3H), 2.55 (s, 3H);  $^{13}\text{C}$  NMR (125 MHz,  $\text{CDCl}_3$ )  $\delta$  199.6, 163.1, 153.3, 148.2, 139.3, 136.2, 133.5, 130.7, 129.6, 129.2, 125.2, 121.5, 120.6, 119.8, 118.9, 118.6, 115.5, 109.5, 28.1, 21.6; ESI-HRMS  $m/z$  calcd for  $\text{C}_{20}\text{H}_{17}\text{N}_2\text{O}_2$   $[\text{M} + \text{H}]^+$  317.1285, found 317.1284.

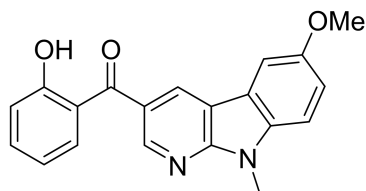

(2-Hydroxyphenyl)(6-methoxy-9-methyl-9*H*-pyrido[2,3-*b*]indol-3-yl)methanone. Compound **3ae** (12.5 h, 55 mg, Yield = 83%,  $R_f = 0.31$  (PE/EA = 3:1)) was isolated as a yellow oil.  $^1\text{H}$  NMR (500 MHz,  $\text{CDCl}_3$ )  $\delta$  11.97 (s, 1H), 8.87 (d,  $J = 2.1$  Hz, 1H), 8.67 (d,  $J = 2.0$  Hz, 1H), 7.71 (dd,  $J = 8.0, 1.7$  Hz, 1H), 7.58 (d,  $J = 2.5$  Hz, 1H), 7.56–7.51 (m, 1H), 7.42 (d,  $J = 8.8$  Hz, 1H), 7.23 (dd,  $J = 8.8, 2.5$  Hz, 1H), 7.12 (dd,  $J = 8.4, 1.2$  Hz, 1H), 6.96–6.92 (m, 1H), 3.99 (s, 3H), 3.93 (s, 3H);  $^{13}\text{C}$  NMR (125 MHz,  $\text{CDCl}_3$ )  $\delta$  199.5, 163.0, 155.1, 153.4, 148.4, 136.2, 135.8, 133.5, 129.8, 125.0, 120.9, 119.8, 118.9, 118.6, 116.9, 115.5, 110.6, 104.4, 56.2, 28.2; ESI-HRMS  $m/z$  calcd for  $\text{C}_{20}\text{H}_{17}\text{N}_2\text{O}_3$   $[\text{M} + \text{H}]^+$  333.1234, found 333.1235.

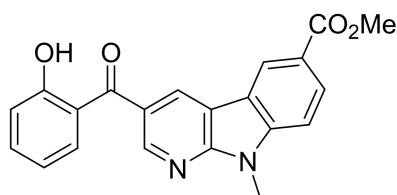

Methyl 3-(2-hydroxybenzoyl)-9-methyl-9*H*-pyrido[2,3-*b*]indole-6-carboxylate. Compound **3af** (5 h, 67 mg, Yield = 93%,  $R_f = 0.58$  (PE/EA = 1:1)) was isolated as a yellow solid; mp 178–179 °C.  $^1\text{H}$  NMR (500 MHz,  $\text{CDCl}_3$ )  $\delta$  11.92 (s, 1H), 8.90 (d,  $J = 2.1$  Hz, 1H), 8.78 (d,  $J = 1.7$  Hz, 1H), 8.69 (d,  $J = 2.1$  Hz, 1H), 8.27 (dd,  $J = 8.7, 1.7$  Hz, 1H), 7.66 (dd,  $J = 8.0, 1.7$  Hz, 1H), 7.56–7.52 (m, 1H), 7.50 (d,  $J = 8.6$  Hz, 1H), 7.11 (dd,  $J = 8.4, 1.1$  Hz, 1H), 6.96–6.90 (m, 1H), 4.01 (s, 3H), 3.97 (s, 3H);  $^{13}\text{C}$  NMR (125 MHz,  $\text{CDCl}_3$ )  $\delta$  199.3, 167.3, 163.1, 153.8, 148.8, 143.7, 136.4, 133.3, 130.1, 129.2, 126.3, 123.8, 123.0, 120.2, 119.6, 119.0, 118.7, 115.5, 109.4, 52.3, 28.3; ESI-HRMS  $m/z$  calcd for  $\text{C}_{21}\text{H}_{17}\text{N}_2\text{O}_4$   $[\text{M} + \text{H}]^+$  361.1183, found 361.1182.

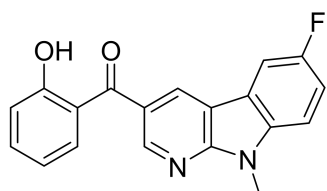

(6-Fluoro-9-methyl-9*H*-pyrido[2,3-*b*]indol-3-yl)(2-hydroxyphenyl)methanone. Compound **3ag** (9 h, 61 mg, Yield = 95%,  $R_f = 0.44$  (PE/EA = 3:1)) was isolated as a yellow solid; mp 170–171 °C.  $^1\text{H}$  NMR (500 MHz,  $\text{CDCl}_3$ )  $\delta$  11.94 (s, 1H), 8.90 (d,  $J = 2.1$  Hz, 1H), 8.66 (d,  $J = 2.1$  Hz, 1H), 7.77 (dd,  $J = 8.4, 2.5$  Hz, 1H), 7.68 (d,  $J = 6.3$  Hz, 1H), 7.54 (t,  $J = 6.8$  Hz, 1H), 7.45 (dd,  $J = 8.9, 4.1$  Hz, 1H), 7.34 (td,  $J = 9.0, 2.5$  Hz, 1H), 7.12 (d,  $J = 8.4$  Hz, 1H), 6.94 (t,  $J = 7.6$  Hz, 1H), 4.01 (s, 3H);  $^{13}\text{C}$  NMR (125 MHz,  $\text{CDCl}_3$ )  $\delta$  199.4, 163.1, 158.4 (d,  $J = 237.3$  Hz), 153.6, 148.9, 137.4, 136.4, 133.4, 130.2, 125.4, 121.0

(d,  $J = 9.5$  Hz), 119.7, 119.0, 118.7, 115.7 (d,  $J = 25.1$  Hz), 115.2 (d,  $J = 4.1$  Hz), 110.6 (d,  $J = 9.0$  Hz), 107.6 (d,  $J = 24.1$  Hz), 28.3;  $^{19}\text{F}$  NMR (376 MHz,  $\text{CDCl}_3$ )  $\delta$  -121.4 (m, 1F); ESI-HRMS  $m/z$  calcd for  $\text{C}_{19}\text{H}_{14}\text{FN}_2\text{O}_2$   $[\text{M} + \text{H}]^+$  321.1034, found 321.1036.

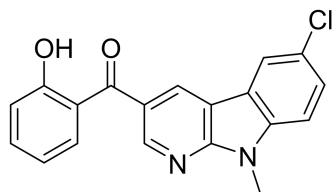

(6-Chloro-9-methyl-9H-pyrido[2,3-*b*]indol-3-yl)(2-hydroxyphenyl)methanone. Compound **3ah** (11 h, 56 mg, Yield = 84%,  $R_f = 0.49$  (PE/EA = 3:1)) was isolated as a yellow solid; mp 140–142 °C.  $^1\text{H}$  NMR (500 MHz,  $\text{CDCl}_3$ )  $\delta$  11.93 (s, 1H), 8.90 (d,  $J = 2.1$  Hz, 1H), 8.65 (d,  $J = 2.1$  Hz, 1H), 8.06 (d,  $J = 2.0$  Hz, 1H), 7.67 (dd,  $J = 8.0, 1.7$  Hz, 1H), 7.57–7.52 (m, 2H), 7.44 (d,  $J = 8.7$  Hz, 1H), 7.12 (dd,  $J = 8.4, 1.2$  Hz, 1H), 6.96–6.91 (m, 1H), 4.00 (s, 3H);  $^{13}\text{C}$  NMR (125 MHz,  $\text{CDCl}_3$ )  $\delta$  199.3, 163.1, 153.4, 148.9, 139.4, 136.4, 133.3, 130.2, 128.0, 126.8, 125.8, 121.5, 121.4, 119.6, 119.0, 118.7, 114.7, 110.8, 28.2; ESI-HRMS  $m/z$  calcd for  $\text{C}_{19}\text{H}_{14}\text{ClN}_2\text{O}_2$   $[\text{M} + \text{H}]^+$  337.0738, found 337.0738.

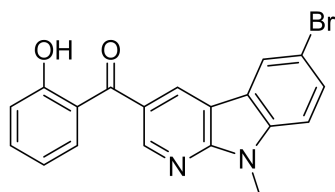

(6-Bromo-9-methyl-9H-pyrido[2,3-*b*]indol-3-yl)(2-hydroxyphenyl)methanone. Compound **3ai** (8.5 h, 66 mg, Yield = 87%,  $R_f = 0.38$  (PE/EA = 3:1)) was isolated as a yellow solid; mp 176–177 °C.  $^1\text{H}$  NMR (500 MHz,  $\text{CDCl}_3$ )  $\delta$  11.96 (s, 1H), 8.93 (d,  $J = 2.0$  Hz, 1H), 8.66 (d,  $J = 2.1$  Hz, 1H), 8.24 (d,  $J = 1.9$  Hz, 1H), 7.73–7.67 (m, 2H), 7.61–7.54 (m, 1H), 7.42 (d,  $J = 8.7$  Hz, 1H), 7.14 (d,  $J = 8.5$  Hz, 1H), 6.96 (t,  $J = 7.0$  Hz, 1H), 4.02 (s, 3H);  $^{13}\text{C}$  NMR (125 MHz,  $\text{CDCl}_3$ )  $\delta$  199.3, 163.1, 153.2, 149.0, 139.7, 136.4, 133.3, 130.6, 130.1, 125.9, 124.4, 122.1, 119.6, 119.0, 118.7, 114.5, 114.0, 111.3, 28.2; ESI-HRMS  $m/z$  calcd for  $\text{C}_{19}\text{H}_{14}\text{BrN}_2\text{O}_2$   $[\text{M} + \text{H}]^+$  381.0233, found 381.0230.

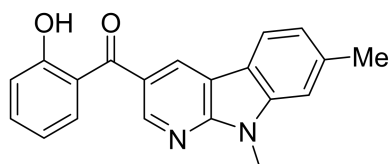

(7,9-Dimethyl-9H-pyrido[2,3-*b*]indol-3-yl)(2-hydroxyphenyl)methanone. Compound **3aj** (10 h, 54 mg, Yield = 86%,  $R_f = 0.53$  (PE/EA = 3:1)) was isolated as a yellow solid; mp 159–160 °C.  $^1\text{H}$  NMR (500 MHz,  $\text{CDCl}_3$ )  $\delta$  11.98 (s, 1H), 8.85 (d,  $J = 2.1$  Hz, 1H), 8.66 (d,  $J = 2.1$  Hz, 1H), 7.99 (d,  $J = 7.9$  Hz, 1H), 7.72 (dd,  $J = 8.0, 1.7$  Hz, 1H), 7.57–7.51 (m, 1H), 7.32 (s, 1H), 7.19 (d,  $J = 7.9$  Hz, 1H), 7.12 (d,  $J = 8.4$  Hz, 1H), 6.96–6.91 (m, 1H), 4.00 (s, 3H), 2.61 (s, 3H);  $^{13}\text{C}$  NMR (125 MHz,  $\text{CDCl}_3$ )  $\delta$  199.7, 163.1, 153.4, 147.8, 141.6, 138.5, 136.2, 133.5, 129.2, 125.4, 122.7, 121.3, 119.8, 118.9, 118.6, 118.2, 115.8, 110.0, 28.0, 22.5; ESI-HRMS  $m/z$  calcd for  $\text{C}_{20}\text{H}_{17}\text{N}_2\text{O}_2$   $[\text{M} + \text{H}]^+$  317.1285, found 317.1286.

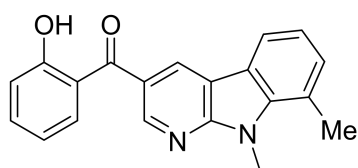

(8,9-Dimethyl-9*H*-pyrido[2,3-*b*]indol-3-yl)(2-hydroxyphenyl)methanone. Compound **3ak** (7 h, 51 mg, Yield = 81%,  $R_f = 0.57$  (PE/EA = 3:1)) was isolated as a yellow oil.  $^1\text{H NMR}$  (500 MHz,  $\text{CDCl}_3$ )  $\delta$  11.98 (s, 1H), 8.88 (d,  $J = 2.1$  Hz, 1H), 8.66 (d,  $J = 2.1$  Hz, 1H), 7.95 (d,  $J = 6.8$  Hz, 1H), 7.71 (dd,  $J = 7.9, 1.7$  Hz, 1H), 7.57–7.51 (m, 1H), 7.30 (d,  $J = 7.3$  Hz, 1H), 7.22 (t,  $J = 7.5$  Hz, 1H), 7.12 (dd,  $J = 8.4, 1.1$  Hz, 1H), 6.96–6.91 (m, 1H), 4.30 (s, 3H), 2.90 (s, 3H);  $^{13}\text{C NMR}$  (125 MHz,  $\text{CDCl}_3$ )  $\delta$  199.6, 163.1, 153.6, 148.2, 139.7, 136.2, 133.5, 130.8, 129.4, 125.4, 121.8, 121.2, 119.8, 119.4, 118.9, 118.6, 115.6, 31.2, 20.0, (1C is merged with other peaks); ESI-HRMS  $m/z$  calcd for  $\text{C}_{20}\text{H}_{17}\text{N}_2\text{O}_2$   $[\text{M} + \text{H}]^+$  317.1285, found 317.1286.

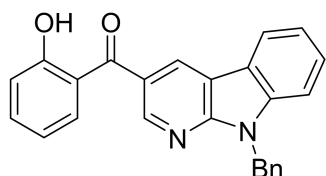

(9-Benzyl-9*H*-pyrido[2,3-*b*]indol-3-yl)(2-hydroxyphenyl)methanone. Compound **3al** (13.5 h, 73 mg, Yield = 96%,  $R_f = 0.76$  (PE/EA = 3:1)) was isolated as a yellow solid; mp 143–144 °C.  $^1\text{H NMR}$  (500 MHz,  $\text{CDCl}_3$ )  $\delta$  12.00 (s, 1H), 8.92 (d,  $J = 2.1$  Hz, 1H), 8.74 (d,  $J = 2.1$  Hz, 1H), 8.14 (d,  $J = 7.7$  Hz, 1H), 7.75 (dd,  $J = 8.0, 1.7$  Hz, 1H), 7.58–7.49 (m, 2H), 7.44 (d,  $J = 8.2$  Hz, 1H), 7.35 (t,  $J = 7.3$  Hz, 1H), 7.32–7.23 (m, 5H), 7.13 (d,  $J = 7.3$  Hz, 1H), 6.97–6.93 (m, 1H), 5.76 (s, 2H);  $^{13}\text{C NMR}$  (125 MHz,  $\text{CDCl}_3$ )  $\delta$  199.6, 163.1, 153.2, 148.5, 140.4, 136.7, 136.3, 133.5, 129.9, 128.9, 127.9, 127.8, 127.2, 125.9, 121.7, 121.3, 120.8, 119.7, 119.0, 118.6, 115.6, 110.6, 45.5; ESI-HRMS  $m/z$  calcd for  $\text{C}_{25}\text{H}_{19}\text{N}_2\text{O}_2$   $[\text{M} + \text{H}]^+$  379.1441, found 379.1438.

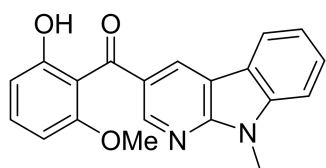

(2-Hydroxy-6-methoxyphenyl)(9-methyl-9*H*-pyrido[2,3-*b*]indol-3-yl)methanone. Compound **3ba** (6 h, 24mg, Yield = 36%,  $R_f = 0.39$  (PE/EA = 2:1)) was isolated as a white solid; mp 252–253 °C.  $^1\text{H NMR}$  (500 MHz,  $\text{CDCl}_3$ )  $\delta$  10.51 (s, 1H), 8.80 (d,  $J = 2.0$  Hz, 1H), 8.69 (d,  $J = 2.1$  Hz, 1H), 8.10 (d,  $J = 7.7$  Hz, 1H), 7.59 (t,  $J = 7.7$  Hz, 1H), 7.50 (d,  $J = 8.1$  Hz, 1H), 7.42 (t,  $J = 8.3$  Hz, 1H), 7.35 (t,  $J = 7.5$  Hz, 1H), 6.72 (d,  $J = 8.3$  Hz, 1H), 6.49 (d,  $J = 8.3$  Hz, 1H), 4.01 (s, 3H), 3.57 (s, 3H);  $^{13}\text{C NMR}$  (125 MHz,  $\text{CDCl}_3$ )  $\delta$  197.6, 161.7, 159.8, 153.3, 149.0, 141.0, 135.5, 129.2, 128.0, 127.5, 121.4, 121.1, 120.9, 115.3, 112.2, 110.7, 109.7, 102.5, 55.6, 28.1; ESI-HRMS  $m/z$  calcd for  $\text{C}_{20}\text{H}_{17}\text{N}_2\text{O}_3$   $[\text{M} + \text{H}]^+$  333.1234, found 333.1239.

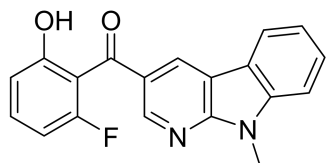

(2-Fluoro-6-hydroxyphenyl)(9-methyl-9*H*-pyrido[2,3-*b*]indol-3-yl)methanone. Compound **3ca** (9 h, 30 mg, Yield = 45%,  $R_f = 0.28$  (PE/EA = 3:1)) was isolated as a yellow oil.  $^1\text{H NMR}$  (500 MHz,  $\text{CDCl}_3$ )  $\delta$  10.88 (s, 1H), 8.88 (dd,  $J = 4.1, 2.1$  Hz, 1H), 8.70 (t,  $J = 2.4$  Hz, 1H), 8.10 (d,  $J = 7.8$  Hz, 1H), 7.61–7.56 (m, 1H), 7.51–7.44 (m, 2H), 7.38–7.33 (m, 1H), 6.93 (d,  $J = 8.5$  Hz, 1H), 6.71–6.65 (m, 1H), 4.00 (s, 3H);  $^{13}\text{C NMR}$  (125 MHz,  $\text{CDCl}_3$ )  $\delta$  195.7, 162.1 (d,  $J = 3.8$  Hz), 161.4 (d,  $J = 252.9$  Hz),

153.6, 148.7 (d,  $J = 5.0$  Hz), 141.1, 135.8 (d,  $J = 11.8$  Hz), 129.3 (d,  $J = 2.8$  Hz), 127.8, 127.0 (d,  $J = 3.1$  Hz), 121.6, 121.3, 120.7, 115.6, 114.2 (d,  $J = 3.0$  Hz), 111.1 (d,  $J = 15.1$  Hz), 109.8, 107.0 (d,  $J = 23.1$  Hz), 28.1;  $^{19}\text{F}$  NMR (376 MHz,  $\text{CDCl}_3$ )  $\delta$  -101.3 (m, 1F); ESI-HRMS  $m/z$  calcd for  $\text{C}_{19}\text{H}_{14}\text{FN}_2\text{O}_2$   $[\text{M} + \text{H}]^+$  321.1034, found 321.1040.

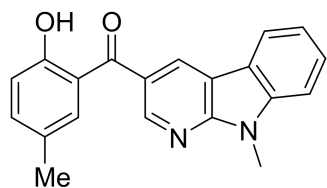

(2-Hydroxy-5-methylphenyl)(9-methyl-9H-pyrido[2,3-*b*]indol-3-yl)methanone. Compound **3da** (12 h, 55 mg, Yield = 87%,  $R_f = 0.55$  (PE/EA = 3:1)) was isolated as a yellow oil.  $^1\text{H}$  NMR (500 MHz,  $\text{CDCl}_3$ )  $\delta$  11.78 (s, 1H), 8.88 (d,  $J = 2.1$  Hz, 1H), 8.72 (d,  $J = 2.1$  Hz, 1H), 8.13 (d,  $J = 7.8$  Hz, 1H), 7.64–7.59 (m, 1H), 7.52 (d,  $J = 8.2$  Hz, 1H), 7.48 (d,  $J = 2.3$  Hz, 1H), 7.40–7.34 (m, 2H), 7.03 (d,  $J = 8.5$  Hz, 1H), 4.03 (s, 3H), 2.28 (s, 3H);  $^{13}\text{C}$  NMR (125 MHz,  $\text{CDCl}_3$ )  $\delta$  199.6, 161.0, 153.2, 148.3, 141.1, 137.3, 133.1, 129.7, 128.1, 127.9, 125.7, 121.6, 121.2, 120.6, 119.5, 118.4, 115.8, 109.8, 28.1, 20.7; ESI-HRMS  $m/z$  calcd for  $\text{C}_{20}\text{H}_{17}\text{N}_2\text{O}_2$   $[\text{M} + \text{H}]^+$  317.1285, found 317.1287.

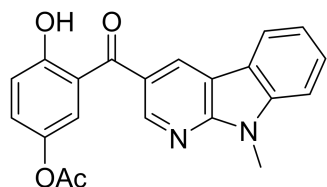

4-Hydroxy-3-(9-methyl-9H-pyrido[2,3-*b*]indole-3-carbonyl)phenyl acetate. Compound **3ea** (9 h, 43 mg, Yield = 60%,  $R_f = 0.43$  (PE/EA = 2:1)) was isolated as a yellow solid; mp 140–141 °C.  $^1\text{H}$  NMR (500 MHz,  $\text{CDCl}_3$ )  $\delta$  12.25 (s, 1H), 8.88 (d,  $J = 2.0$  Hz, 1H), 8.69 (d,  $J = 2.0$  Hz, 1H), 8.13 (d,  $J = 7.7$  Hz, 1H), 7.74 (d,  $J = 8.7$  Hz, 1H), 7.64–7.59 (m, 1H), 7.52 (d,  $J = 8.2$  Hz, 1H), 7.38 (t,  $J = 6.7$  Hz, 1H), 6.88 (d,  $J = 2.3$  Hz, 1H), 6.71 (dd,  $J = 8.8, 2.3$  Hz, 1H), 4.03 (s, 3H), 2.34 (s, 3H);  $^{13}\text{C}$  NMR (125 MHz,  $\text{CDCl}_3$ )  $\delta$  198.8, 168.7, 164.7, 156.6, 153.3, 148.2, 141.1, 134.7, 129.6, 127.9, 125.4, 121.7, 121.2, 120.5, 117.7, 115.7, 112.9, 111.5, 109.8, 28.1, 21.4; ESI-HRMS  $m/z$  calcd for  $\text{C}_{21}\text{H}_{17}\text{N}_2\text{O}_4$   $[\text{M} + \text{H}]^+$  361.1183, found 361.1181.

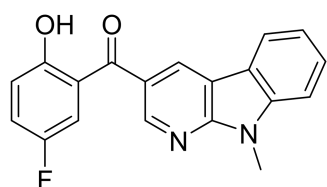

(5-Fluoro-2-hydroxyphenyl)(9-methyl-9H-pyrido[2,3-*b*]indol-3-yl)methanone. Compound **3fa** (14 h, 62 mg, Yield = 97%,  $R_f = 0.58$  (PE/EA = 3:1)) was isolated as a yellow oil.  $^1\text{H}$  NMR (500 MHz,  $\text{CDCl}_3$ )  $\delta$  11.66 (s, 1H), 8.87 (d,  $J = 2.1$  Hz, 1H), 8.67 (d,  $J = 2.0$  Hz, 1H), 8.11 (d,  $J = 7.6$  Hz, 1H), 7.63–7.58 (m, 1H), 7.51 (d,  $J = 8.1$  Hz, 1H), 7.41–7.34 (m, 2H), 7.30–7.24 (m, 1H), 7.08 (dd,  $J = 9.1, 4.5$  Hz, 1H), 4.00 (s, 3H);  $^{13}\text{C}$  NMR (125 MHz,  $\text{CDCl}_3$ )  $\delta$  198.5 (d,  $J = 2.4$  Hz), 159.1 (d,  $J = 1.5$  Hz), 154.8 (d,  $J = 237.4$  Hz), 153.3, 148.2, 141.1, 129.5, 128.0, 124.9, 123.8, 123.6, 121.7 (d,  $J = 23.4$  Hz), 120.4, 119.9 (d,  $J = 7.2$  Hz), 119.3 (d,  $J = 6.1$  Hz), 118.2 (d,  $J = 23.6$  Hz), 115.7, 109.8, 28.1;  $^{19}\text{F}$  NMR (376 MHz,  $\text{CDCl}_3$ )  $\delta$  -123.6 (m, 1F); ESI-HRMS  $m/z$  calcd for  $\text{C}_{19}\text{H}_{14}\text{FN}_2\text{O}_2$   $[\text{M} + \text{H}]^+$  321.1034, found 321.1036.

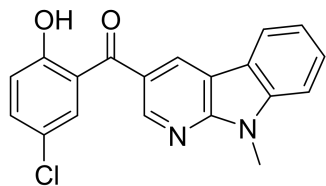

(5-Chloro-2-hydroxyphenyl)(9-methyl-9H-pyrido[2,3-*b*]indol-3-yl)methanone. Compound **3ga** (7 h, 57 mg, Yield = 85%,  $R_f = 0.47$  (PE/EA = 3:1)) was isolated as a yellow solid; mp 183–184 °C.  $^1\text{H}$  NMR (500 MHz,  $\text{CDCl}_3$ )  $\delta$  11.83 (s, 1H), 8.86 (d,  $J = 2.1$  Hz, 1H), 8.68 (d,  $J = 2.1$  Hz, 1H), 8.12 (d,  $J = 7.8$  Hz, 1H), 7.67 (d,  $J = 2.7$  Hz, 1H), 7.61 (t,  $J = 7.8$  Hz, 1H), 7.51 (d,  $J = 8.2$  Hz, 1H), 7.47 (dd,  $J = 8.9$ , 2.6 Hz, 1H), 7.37 (t,  $J = 7.5$  Hz, 1H), 7.07 (d,  $J = 8.9$  Hz, 1H), 4.01 (s, 3H);  $^{13}\text{C}$  NMR (125 MHz,  $\text{CDCl}_3$ )  $\delta$  198.5, 161.5, 153.4, 148.3, 141.2, 136.0, 132.2, 129.6, 128.0, 124.8, 123.7, 121.7, 121.3, 120.4, 120.2, 115.9, 109.8, 28.1, (1C is merged with other peaks); ESI-HRMS  $m/z$  calcd for  $\text{C}_{19}\text{H}_{14}\text{ClN}_2\text{O}_2$  [ $\text{M} + \text{H}$ ] $^+$  337.0738, found 337.0743.

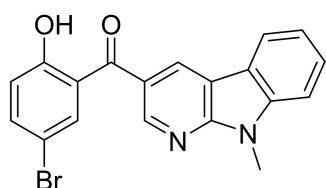

(5-Bromo-2-hydroxyphenyl)(9-methyl-9H-pyrido[2,3-*b*]indol-3-yl)methanone. Compound **3ha** (9 h, 72 mg, Yield = 95%,  $R_f = 0.58$  (PE/EA = 3:1)) was isolated as a yellow solid; mp 182–183 °C.  $^1\text{H}$  NMR (500 MHz,  $\text{CDCl}_3$ )  $\delta$  11.85 (s, 1H), 8.86 (d,  $J = 2.1$  Hz, 1H), 8.69 (d,  $J = 2.1$  Hz, 1H), 8.13 (d,  $J = 7.7$  Hz, 1H), 7.81 (d,  $J = 2.5$  Hz, 1H), 7.64–7.58 (m, 2H), 7.52 (d,  $J = 8.2$  Hz, 1H), 7.38 (t,  $J = 7.5$  Hz, 1H), 7.02 (d,  $J = 8.9$  Hz, 1H), 4.02 (s, 3H);  $^{13}\text{C}$  NMR (125 MHz,  $\text{CDCl}_3$ )  $\delta$  198.4, 161.9, 153.4, 148.3, 141.2, 138.8, 135.2, 129.6, 128.0, 124.8, 121.7, 121.3, 121.1, 120.6, 120.4, 115.9, 110.6, 109.8, 28.1; ESI-HRMS  $m/z$  calcd for  $\text{C}_{19}\text{H}_{14}\text{BrN}_2\text{O}_2$  [ $\text{M} + \text{H}$ ] $^+$  381.0233, found 381.0235.

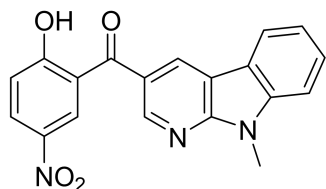

(2-Hydroxy-5-nitrophenyl)(9-methyl-9H-pyrido[2,3-*b*]indol-3-yl)methanone. Compound **3ia** (2 h, 48 mg, Yield = 70%,  $R_f = 0.21$  (PE/EA = 3:1)) was isolated as a yellow solid; mp 212–213 °C.  $^1\text{H}$  NMR (500 MHz,  $\text{CDCl}_3$ )  $\delta$  12.65 (s, 1H), 8.90 (d,  $J = 2.1$  Hz, 1H), 8.73 (d,  $J = 2.1$  Hz, 1H), 8.71 (d,  $J = 2.7$  Hz, 1H), 8.42 (dd,  $J = 9.3$ , 2.7 Hz, 1H), 8.14 (d,  $J = 7.8$  Hz, 1H), 7.66–7.62 (m, 1H), 7.55 (d,  $J = 8.2$  Hz, 1H), 7.42–7.38 (m, 1H), 7.22 (d,  $J = 9.2$  Hz, 1H), 4.05 (s, 3H);  $^{13}\text{C}$  NMR (125 MHz,  $\text{CDCl}_3$ )  $\delta$  198.4, 167.9, 153.7, 148.4, 141.3, 139.7, 130.8, 129.6, 129.4, 128.3, 124.1, 121.8, 121.6, 120.4, 119.7, 118.7, 116.1, 110.0, 28.2; ESI-HRMS  $m/z$  calcd for  $\text{C}_{19}\text{H}_{14}\text{N}_3\text{O}_4$  [ $\text{M} + \text{H}$ ] $^+$  348.0979, found 348.0982.

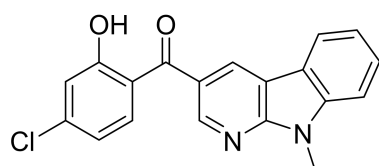

(4-Chloro-2-hydroxyphenyl)(9-methyl-9H-pyrido[2,3-*b*]indol-3-yl)methanone. Compound **3ja** (2 h, 61 mg, Yield = 91%,  $R_f = 0.50$  (PE/EA = 3:1)) was isolated as a yellow solid; mp 185–186 °C.  $^1\text{H}$  NMR

(500 MHz, CDCl<sub>3</sub>)  $\delta$  12.15 (s, 1H), 8.85 (d,  $J = 2.1$  Hz, 1H), 8.67 (d,  $J = 2.1$  Hz, 1H), 8.11 (d,  $J = 7.5$  Hz, 1H), 7.64 (d,  $J = 8.5$  Hz, 1H), 7.62–7.59 (m, 1H), 7.52 (d,  $J = 8.2$  Hz, 1H), 7.37 (t,  $J = 7.5$  Hz, 1H), 7.12 (d,  $J = 2.1$  Hz, 1H), 6.91 (dd,  $J = 8.5, 2.0$  Hz, 1H), 4.02 (s, 3H); <sup>13</sup>C NMR (125 MHz, CDCl<sub>3</sub>)  $\delta$  198.8, 163.8, 153.3, 148.2, 142.1, 141.1, 134.3, 129.6, 128.0, 125.1, 121.6, 121.3, 120.4, 119.6, 118.7, 118.3, 115.7, 109.8, 28.1; ESI-HRMS  $m/z$  calcd for C<sub>19</sub>H<sub>14</sub>ClN<sub>2</sub>O<sub>2</sub> [M + H]<sup>+</sup> 337.0738, found 337.0738.

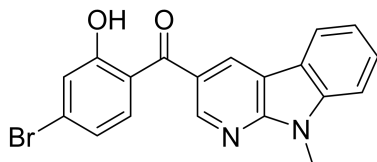

(4-Bromo-2-hydroxyphenyl)(9-methyl-9H-pyrido[2,3-*b*]indol-3-yl)methanone. Compound **3ka** (4 h, 70 mg, Yield = 92%, R<sub>f</sub> = 0.53 (PE/EA = 3:1)) was isolated as a yellow solid; mp 193–194 °C. <sup>1</sup>H NMR (500 MHz, CDCl<sub>3</sub>)  $\delta$  12.10 (s, 1H), 8.87 (d,  $J = 2.0$  Hz, 1H), 8.70 (d,  $J = 2.1$  Hz, 1H), 8.13 (d,  $J = 7.8$  Hz, 1H), 7.65–7.61 (m, 1H), 7.58 (d,  $J = 8.5$  Hz, 1H), 7.54 (d,  $J = 8.2$  Hz, 1H), 7.41–7.37 (m, 1H), 7.32 (d,  $J = 1.9$  Hz, 1H), 7.08 (dd,  $J = 8.5, 1.9$  Hz, 1H), 4.04 (s, 3H); <sup>13</sup>C NMR (125 MHz, CDCl<sub>3</sub>)  $\delta$  199.0, 163.6, 153.4, 148.2, 141.2, 134.3, 130.8, 129.7, 128.1, 125.2, 122.5, 121.9, 121.7, 121.4, 120.5, 118.7, 115.8, 109.9, 28.2; ESI-HRMS  $m/z$  calcd for C<sub>19</sub>H<sub>14</sub>BrN<sub>2</sub>O<sub>2</sub> [M + H]<sup>+</sup> 381.0233, found 381.0234.

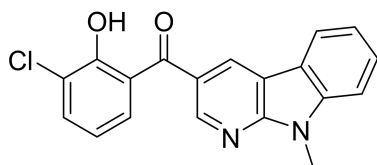

(3-Chloro-2-hydroxyphenyl)(9-methyl-9H-pyrido[2,3-*b*]indol-3-yl)methanone. Compound **3la** (2 h, 60 mg, Yield = 90%, R<sub>f</sub> = 0.53 (PE/EA = 3:1)) was isolated as a yellow solid; mp 147–148 °C. <sup>1</sup>H NMR (500 MHz, CDCl<sub>3</sub>)  $\delta$  12.47 (s, 1H), 8.87 (d,  $J = 2.0$  Hz, 1H), 8.70 (d,  $J = 2.0$  Hz, 1H), 8.12 (d,  $J = 7.8$  Hz, 1H), 7.66–7.60 (m, 3H), 7.53 (d,  $J = 8.2$  Hz, 1H), 7.38 (t,  $J = 7.5$  Hz, 1H), 6.91 (t,  $J = 7.9$  Hz, 1H), 4.02 (s, 3H); <sup>13</sup>C NMR (125 MHz, CDCl<sub>3</sub>)  $\delta$  199.2, 158.6, 153.4, 148.5, 141.2, 136.1, 131.9, 129.8, 128.0, 125.0, 123.2, 121.7, 121.4, 120.8, 120.5, 119.0, 115.8, 109.9, 28.1; ESI-HRMS  $m/z$  calcd for C<sub>19</sub>H<sub>14</sub>ClN<sub>2</sub>O<sub>2</sub> [M + H]<sup>+</sup> 337.0738, found 337.0736.

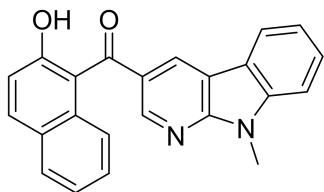

(2-Hydroxynaphthalen-1-yl)(9-methyl-9H-pyrido[2,3-*b*]indol-3-yl)methanone. Compound **3ma** (12 h, 39 mg, Yield = 56%, R<sub>f</sub> = 0.25 (PE/EA = 3:1)) was isolated as a yellow oil. <sup>1</sup>H NMR (500 MHz, CDCl<sub>3</sub>)  $\delta$  10.78 (s, 1H), 8.70 (d,  $J = 2.0$  Hz, 1H), 8.68 (d,  $J = 2.0$  Hz, 1H), 8.00 (d,  $J = 7.7$  Hz, 1H), 7.94 (d,  $J = 8.9$  Hz, 1H), 7.78 (d,  $J = 8.1$  Hz, 1H), 7.57 (t,  $J = 7.7$  Hz, 1H), 7.47 (d,  $J = 8.1$  Hz, 1H), 7.42 (d,  $J = 8.6$  Hz, 1H), 7.32 (t,  $J = 7.5$  Hz, 1H), 7.30–7.25 (m, 2H), 7.18–7.12 (m, 1H), 3.94 (s, 3H); <sup>13</sup>C NMR (125 MHz, CDCl<sub>3</sub>)  $\delta$  198.1, 160.0, 153.4, 149.4, 141.0, 135.7, 132.6, 129.6, 128.7, 128.6, 127.8, 127.5, 127.1, 126.1, 123.9, 121.6, 121.2, 120.7, 119.1, 115.8, 115.4, 109.7, 28.1; ESI-HRMS  $m/z$  calcd for C<sub>23</sub>H<sub>17</sub>N<sub>2</sub>O<sub>2</sub> [M + H]<sup>+</sup> 353.1285, found 353.1285.

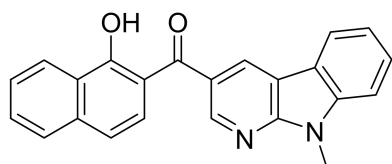

(3-Hydroxynaphthalen-2-yl)(9-methyl-9H-pyrido[2,3-*b*]indol-3-yl)methanone. Compound **3na** (9 h, 66 mg, Yield = 94%,  $R_f = 0.56$  (PE/EA = 3:1)) was isolated as a yellow solid; mp 187–188 °C.  $^1\text{H}$  NMR (500 MHz,  $\text{CDCl}_3$ )  $\delta$  13.94 (s, 1H), 8.93 (d,  $J = 2.1$  Hz, 1H), 8.74 (d,  $J = 2.0$  Hz, 1H), 8.55 (d,  $J = 8.4$  Hz, 1H), 8.12 (d,  $J = 7.4$  Hz, 1H), 7.79 (d,  $J = 8.1$  Hz, 1H), 7.70–7.64 (m, 2H), 7.63–7.55 (m, 2H), 7.51 (d,  $J = 8.2$  Hz, 1H), 7.37 (t,  $J = 7.5$  Hz, 1H), 7.28 (d,  $J = 8.8$  Hz, 1H), 4.02 (s, 3H);  $^{13}\text{C}$  NMR (125 MHz,  $\text{CDCl}_3$ )  $\delta$  199.4, 163.8, 153.1, 148.2, 141.1, 137.3, 130.4, 129.7, 127.8, 127.6, 127.4, 126.1, 125.7, 125.4, 124.6, 121.6, 121.1, 120.5, 118.2, 115.6, 113.1, 109.7, 28.1; ESI-HRMS  $m/z$  calcd for  $\text{C}_{23}\text{H}_{17}\text{N}_2\text{O}_2$   $[\text{M} + \text{H}]^+$  353.1285, found 353.1285.

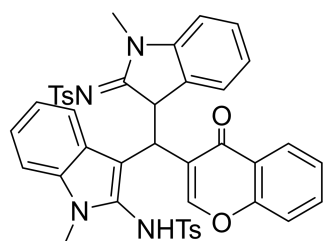

(*Z*)-4-methyl-*N*-(1-methyl-3-((1-methyl-2-((4-methylphenyl)sulfonamido)-1*H*-indol-3-yl)(4-oxo-4*H*-chromen-3-yl)methyl)indolin-2-ylidene)benzenesulfonamide. Compound **4aa** (19 h, 15 mg, Yield = 10%,  $R_f = 0.34$  (PE/EA = 2:1)) was isolated as a white solid; mp 170–171 °C.  $^1\text{H}$  NMR (500 MHz,  $\text{CDCl}_3$ )  $\delta$  9.89 (s, 1H), 8.41 (dd,  $J = 8.0, 1.7$  Hz, 1H), 7.98 (d,  $J = 8.2$  Hz, 2H), 7.76–7.69 (m, 3H), 7.51 (t,  $J = 7.6$  Hz, 1H), 7.43 (d,  $J = 8.4$  Hz, 1H), 7.29 (d,  $J = 8.1$  Hz, 2H), 7.25–7.19 (m, 2H), 7.01 (t,  $J = 7.6$  Hz, 1H), 6.98 (d,  $J = 1.6$  Hz, 1H), 6.94 (t,  $J = 7.6$  Hz, 1H), 6.82 (d,  $J = 7.9$  Hz, 2H), 6.72 (d,  $J = 7.4$  Hz, 1H), 6.50 (d,  $J = 6.0$  Hz, 1H), 6.43 (d,  $J = 7.8$  Hz, 1H), 6.38 (t,  $J = 7.6$  Hz, 1H), 5.17 (d,  $J = 8.2$  Hz, 1H), 5.09 (dd,  $J = 6.1, 1.6$  Hz, 1H), 3.89 (s, 3H), 2.59 (s, 3H), 2.42 (s, 3H), 1.38 (s, 3H);  $^{13}\text{C}$  NMR (125 MHz,  $\text{CDCl}_3$ )  $\delta$  177.0, 172.1, 155.8, 155.5, 144.8, 143.3, 142.8, 139.8, 137.1, 135.2, 133.9, 130.2, 130.0, 129.4, 129.3, 128.6, 127.9, 126.8, 126.6, 125.4, 125.2, 124.2, 124.0, 123.6, 121.9, 121.3, 121.0, 119.0, 118.1, 109.9, 109.6, 103.6, 48.7, 40.1, 30.6, 28.0, 21.7, 20.3; ESI-HRMS  $m/z$  calcd for  $\text{C}_{42}\text{H}_{36}\text{N}_4\text{O}_6\text{S}_2\text{Na}$   $[\text{M} + \text{Na}]^+$  779.1969, found 779.1971.

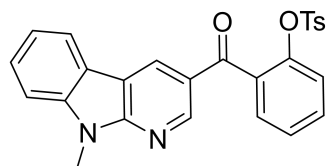

2-(9-Methyl-9*H*-pyrido[2,3-*b*]indole-3-carbonyl)phenyl 4-methylbenzenesulfonate. Compound **5aa** (35 h, 41 mg, Yield = 30%,  $R_f = 0.38$  (PE/EA = 2:1)) was isolated as a brown solid; mp 142–143 °C.  $^1\text{H}$  NMR (500 MHz,  $\text{CDCl}_3$ )  $\delta$  8.65 (d,  $J = 2.0$  Hz, 1H), 8.55 (d,  $J = 2.0$  Hz, 1H), 8.07 (d,  $J = 7.7$  Hz, 1H), 7.62–7.55 (m, 2H), 7.52–7.48 (m, 2H), 7.47–7.39 (m, 4H), 7.37 (t,  $J = 7.5$  Hz, 1H), 6.99 (d,  $J = 8.1$  Hz, 2H), 3.99 (s, 3H), 2.10 (s, 3H);  $^{13}\text{C}$  NMR (125 MHz,  $\text{CDCl}_3$ )  $\delta$  191.7, 153.3, 149.7, 146.7, 145.5, 141.1, 133.2, 132.3, 132.0, 130.5, 129.8, 129.6, 128.5, 127.9, 127.1, 124.8, 124.1, 121.6, 121.4, 120.7, 115.7, 109.8, 28.2, 21.5; ESI-HRMS  $m/z$  calcd for  $\text{C}_{26}\text{H}_{21}\text{N}_2\text{O}_4\text{S}$   $[\text{M} + \text{H}]^+$  457.1217, found 457.1217.

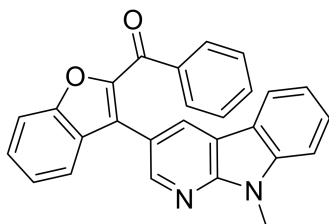

(3-(9-Methyl-9H-pyrido[2,3-*b*]indol-3-yl)benzofuran-2-yl)(phenyl)methanone. Compound **6** (6 h, 114 mg, Yield = 94%,  $R_f$  = 0.46 (PE/EA = 5:1)) was isolated as a yellow oil.  $^1\text{H}$  NMR (500 MHz,  $\text{CDCl}_3$ )  $\delta$  8.69 (d,  $J$  = 2.1 Hz, 1H), 8.53 (d,  $J$  = 2.0 Hz, 1H), 8.07 (d,  $J$  = 7.8 Hz, 1H), 7.98–7.94 (m, 2H), 7.78 (d,  $J$  = 7.9 Hz, 1H), 7.69 (d,  $J$  = 8.4 Hz, 1H), 7.59–7.54 (m, 2H), 7.48 (d,  $J$  = 8.2 Hz, 1H), 7.46–7.42 (m, 1H), 7.42–7.34 (m, 3H), 7.32–7.29 (m, 1H) 3.99 (s, 3H);  $^{13}\text{C}$  NMR (125 MHz,  $\text{CDCl}_3$ )  $\delta$  185.7, 154.8, 151.5, 147.6, 147.1, 140.8, 137.4, 132.8, 130.0, 129.7, 128.6, 128.5, 128.3, 127.7, 127.2, 124.3, 122.3, 121.4, 120.4, 120.3, 118.2, 115.7, 112.7, 109.3, 27.9; ESI-HRMS  $m/z$  calcd for  $\text{C}_{27}\text{H}_{19}\text{N}_2\text{O}_2$  [ $\text{M} + \text{H}$ ] $^+$  403.1441, found 403.1441.

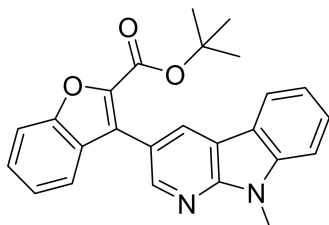

Tert-butyl 3-(9-methyl-9H-pyrido[2,3-*b*]indol-3-yl)benzofuran-2-carboxylate. Compound **7** (2.5 h, 33 mg, Yield = 83%,  $R_f$  = 0.34 (PE/EA = 5:1)) was isolated as a yellow oil.  $^1\text{H}$  NMR (500 MHz,  $\text{CDCl}_3$ )  $\delta$  8.70 (d,  $J$  = 2.0 Hz, 1H), 8.52 (d,  $J$  = 2.1 Hz, 1H), 8.10 (d,  $J$  = 7.8 Hz, 1H), 7.66 (d,  $J$  = 8.4 Hz, 1H), 7.62 (d,  $J$  = 7.9 Hz, 1H), 7.60–7.56 (m, 1H), 7.53–7.48 (m, 2H), 7.35–7.30 (m, 2H), 4.04 (s, 3H), 1.43 (s, 9H);  $^{13}\text{C}$  NMR (125 MHz,  $\text{CDCl}_3$ )  $\delta$  159.3, 154.6, 151.5, 147.3, 141.8, 140.8, 129.9, 128.8, 127.9, 127.1, 125.9, 123.9, 121.9, 121.2, 120.4, 120.3, 118.5, 115.4, 112.5, 109.4, 82.9, 28.3, 28.0; ESI-HRMS  $m/z$  calcd for  $\text{C}_{25}\text{H}_{23}\text{N}_2\text{O}_2$  [ $\text{M} + \text{H}$ ] $^+$  399.1703, found 399.1703.

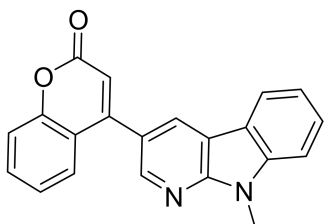

4-(9-Methyl-9H-pyrido[2,3-*b*]indol-3-yl)-2H-chromen-2-one. Compound **8** (0.5 h, 24 mg, Yield = 73%,  $R_f$  = 0.18 (PE/EA = 5:1)) was isolated as a white oil.  $^1\text{H}$  NMR (500 MHz,  $\text{CDCl}_3$ )  $\delta$  8.62 (d,  $J$  = 2.0 Hz, 1H), 8.43 (d,  $J$  = 2.1 Hz, 1H), 8.12 (d,  $J$  = 7.7 Hz, 1H), 7.64–7.57 (m, 3H), 7.54 (d,  $J$  = 8.2 Hz, 1H), 7.46 (d,  $J$  = 8.5 Hz, 1H), 7.36 (t,  $J$  = 7.5 Hz, 1H), 7.27 (t,  $J$  = 7.8 Hz, 1H), 6.50 (s, 1H), 4.04 (s, 3H);  $^{13}\text{C}$  NMR (125 MHz,  $\text{CDCl}_3$ )  $\delta$  160.7, 154.4, 153.8, 152.3, 145.5, 141.1, 132.2, 128.2, 127.8, 127.0, 124.5, 122.5, 121.5, 120.8, 120.1, 119.4, 117.7, 115.9, 115.8, 109.7, 28.1; ESI-HRMS  $m/z$  calcd for  $\text{C}_{21}\text{H}_{15}\text{N}_2\text{O}_2$  [ $\text{M} + \text{H}$ ] $^+$  327.1128, found 327.1127.

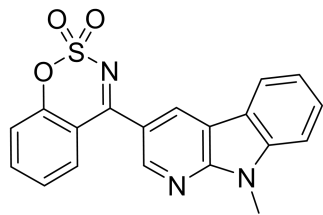

4-(9-Methyl-9H-pyrido[2,3-b]indol-3-yl)benzo[e][1,2,3]oxathiazine 2,2-dioxide. Compound **9** (0.5 h, 22 mg, Yield = 61%,  $R_f = 0.34$  (PE/EA = 5:1)) was isolated as a yellow solid, mp 224–225 °C.  $^1\text{H}$  NMR (500 MHz,  $\text{CDCl}_3$ )  $\delta$  8.83 (dd,  $J = 19.8, 2.1$  Hz, 2H), 8.13 (d,  $J = 7.8$  Hz, 1H), 7.83–7.75 (m, 2H), 7.63 (t,  $J = 7.7$  Hz, 1H), 7.54 (d,  $J = 8.2$  Hz, 1H), 7.49–7.36 (m, 3H), 4.03 (s, 3H);  $^{13}\text{C}$  NMR (125 MHz,  $\text{CDCl}_3$ )  $\delta$  175.1, 154.8, 153.8, 149.1, 141.2, 136.9, 131.9, 130.5, 128.3, 125.9, 121.8, 121.7, 121.2, 120.3, 119.8, 117.0, 116.3, 110.0, 28.2; ESI-HRMS  $m/z$  calcd for  $\text{C}_{19}\text{H}_{14}\text{N}_3\text{O}_3\text{S}$   $[\text{M} + \text{H}]^+$  364.0750, found 364.0750.

## 5. NMR Spectra

FWT2-P\_1.fid

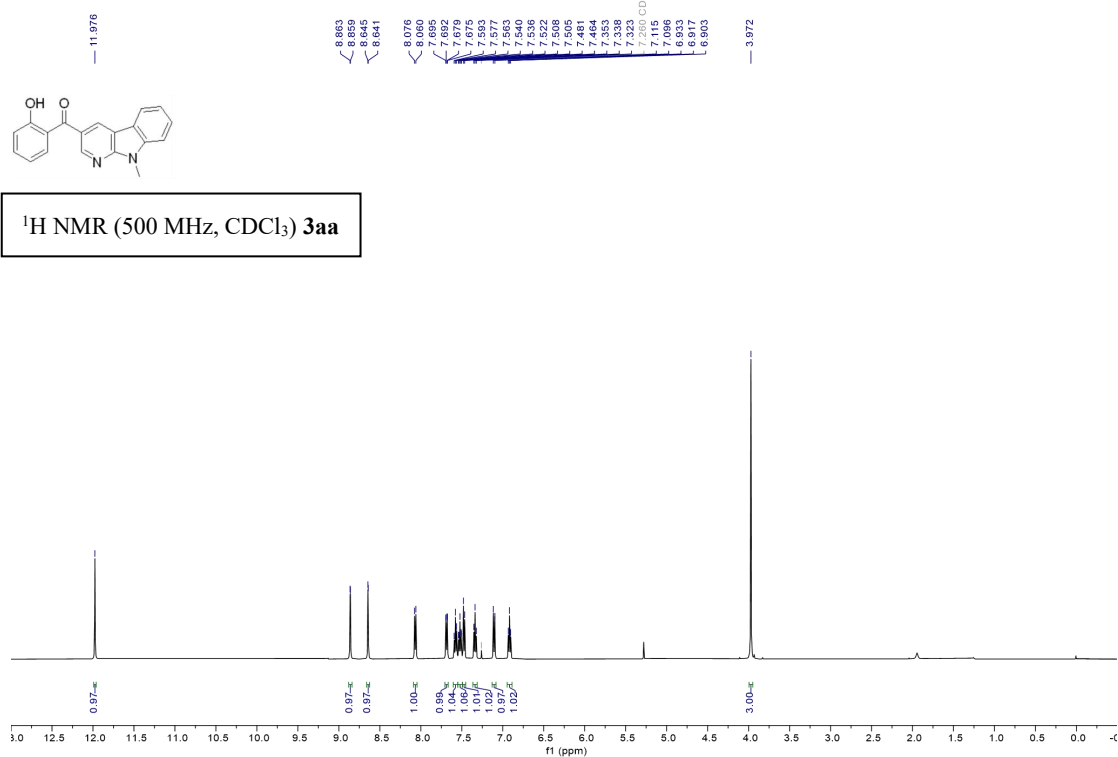

FWT2-P\_2.fid

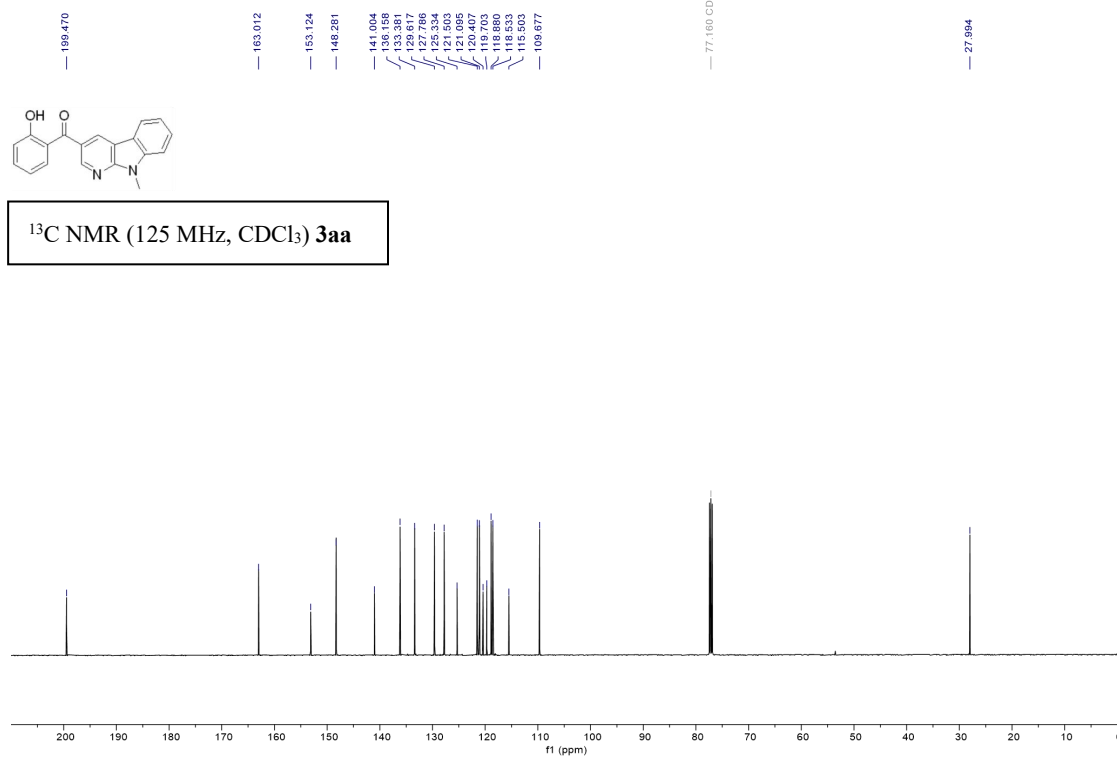

FIT2-174.1.fid

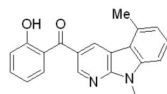

<sup>1</sup>H NMR (500 MHz, CDCl<sub>3</sub>) **3ab**

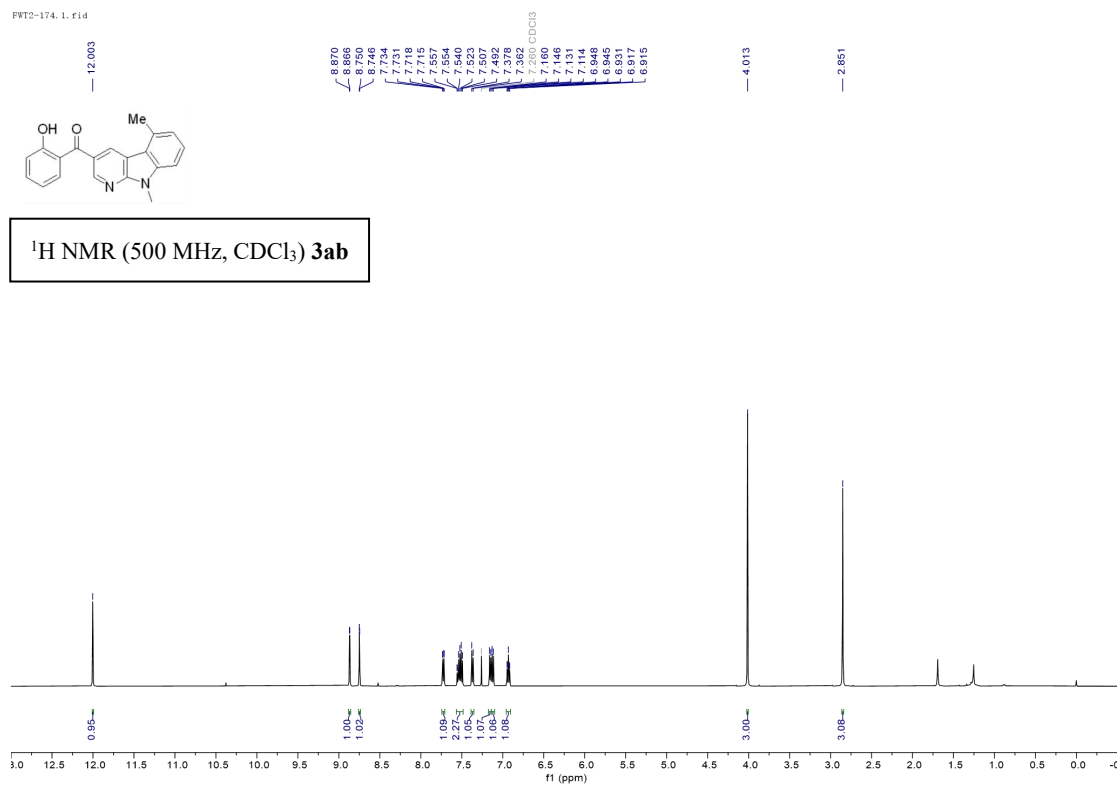

FIT2-174.2.fid

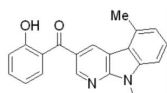

<sup>13</sup>C NMR (125 MHz, CDCl<sub>3</sub>) **3ab**

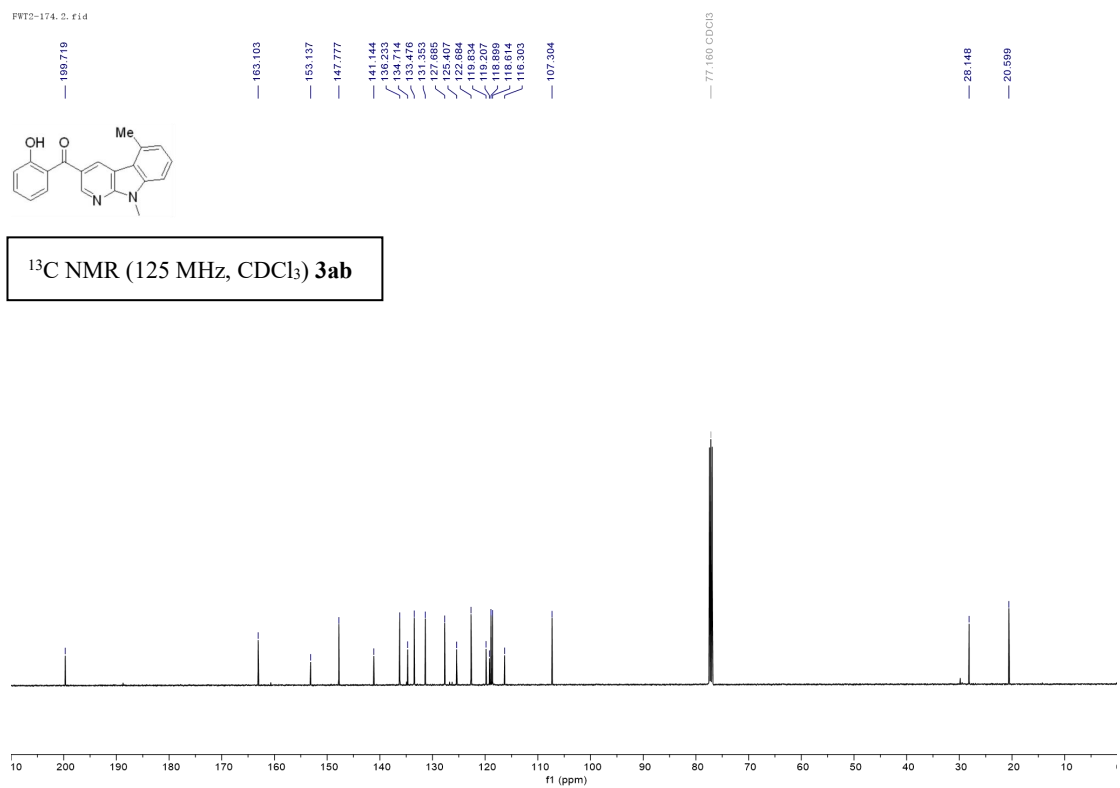

F01-3-175.1.f1d

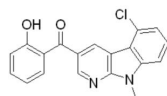

<sup>1</sup>H NMR (500 MHz, CDCl<sub>3</sub>) **3ac**

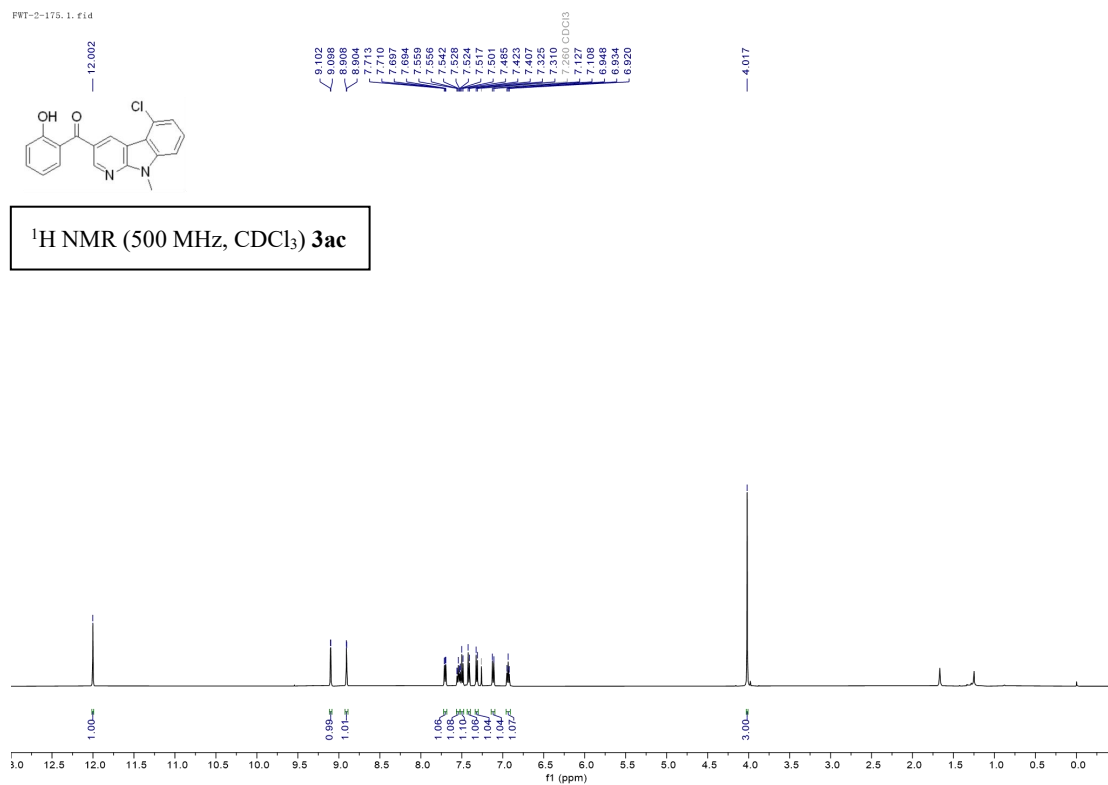

F01-3-175.2.f1d

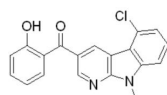

<sup>13</sup>C NMR (125 MHz, CDCl<sub>3</sub>) **3ac**

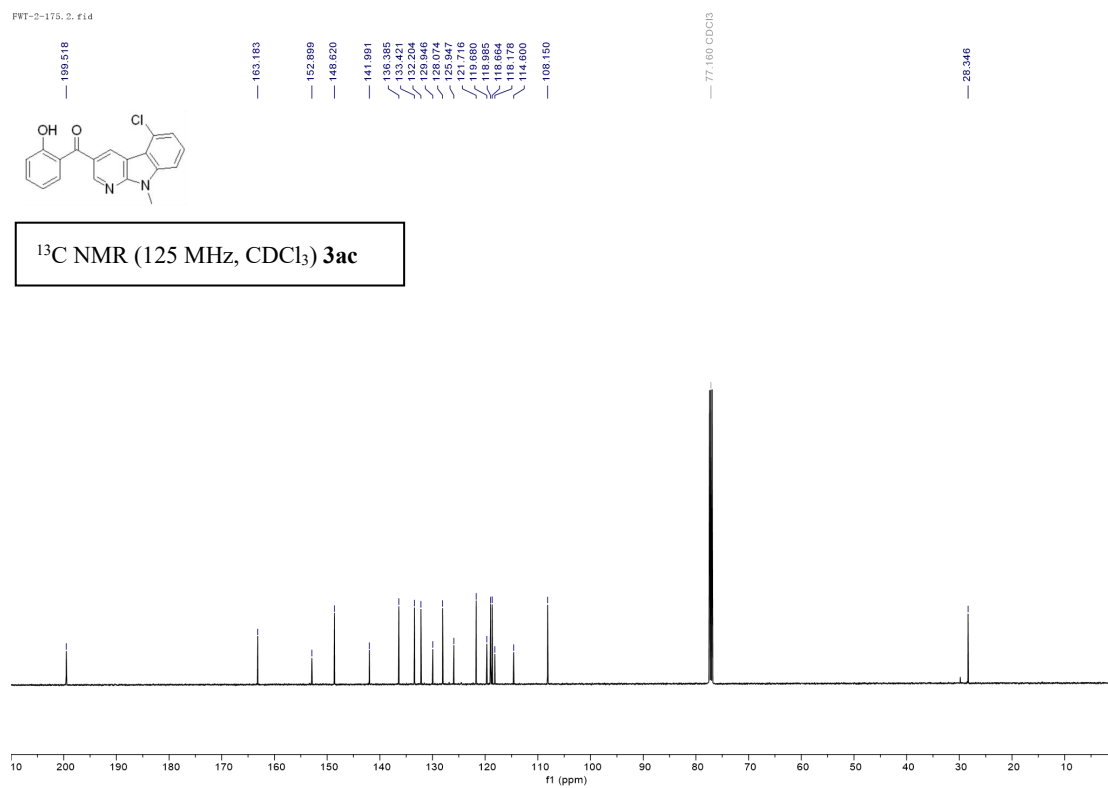

FIT2-171-2.1.rid

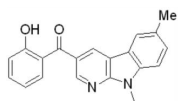

$^1\text{H NMR}$  (500 MHz,  $\text{CDCl}_3$ ) **3ad**

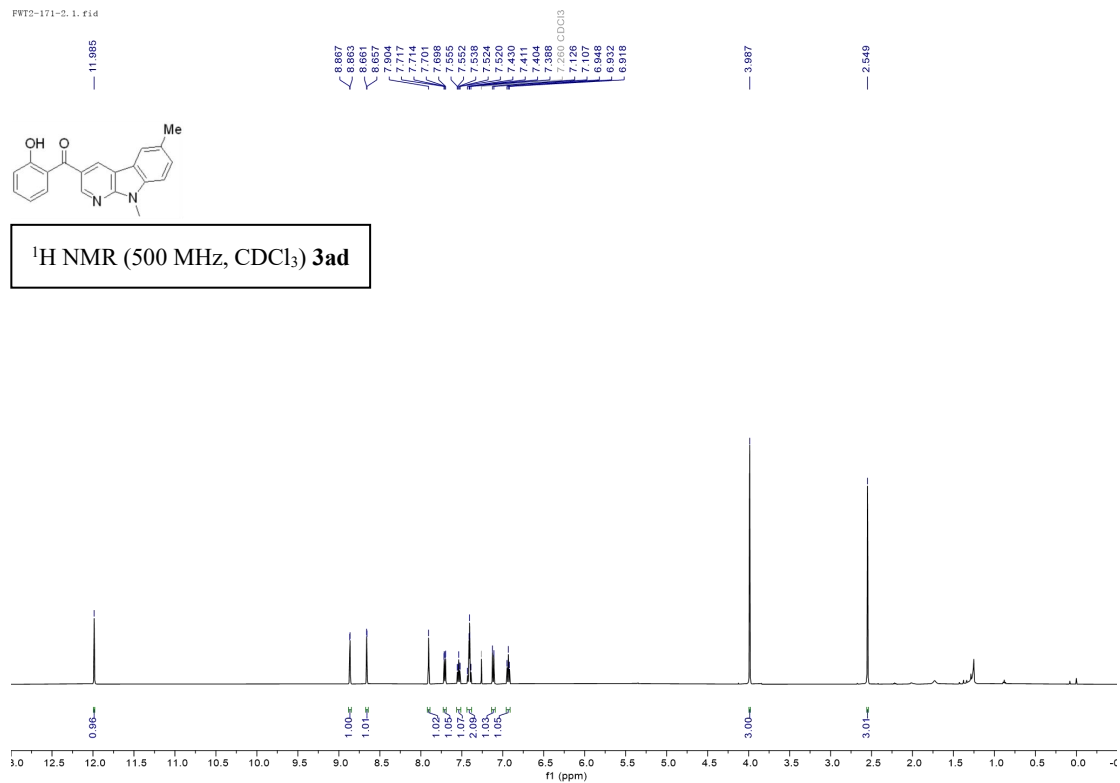

FIT2-171-2.2.rid

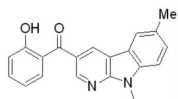

$^{13}\text{C NMR}$  (125 MHz,  $\text{CDCl}_3$ ) **3ad**

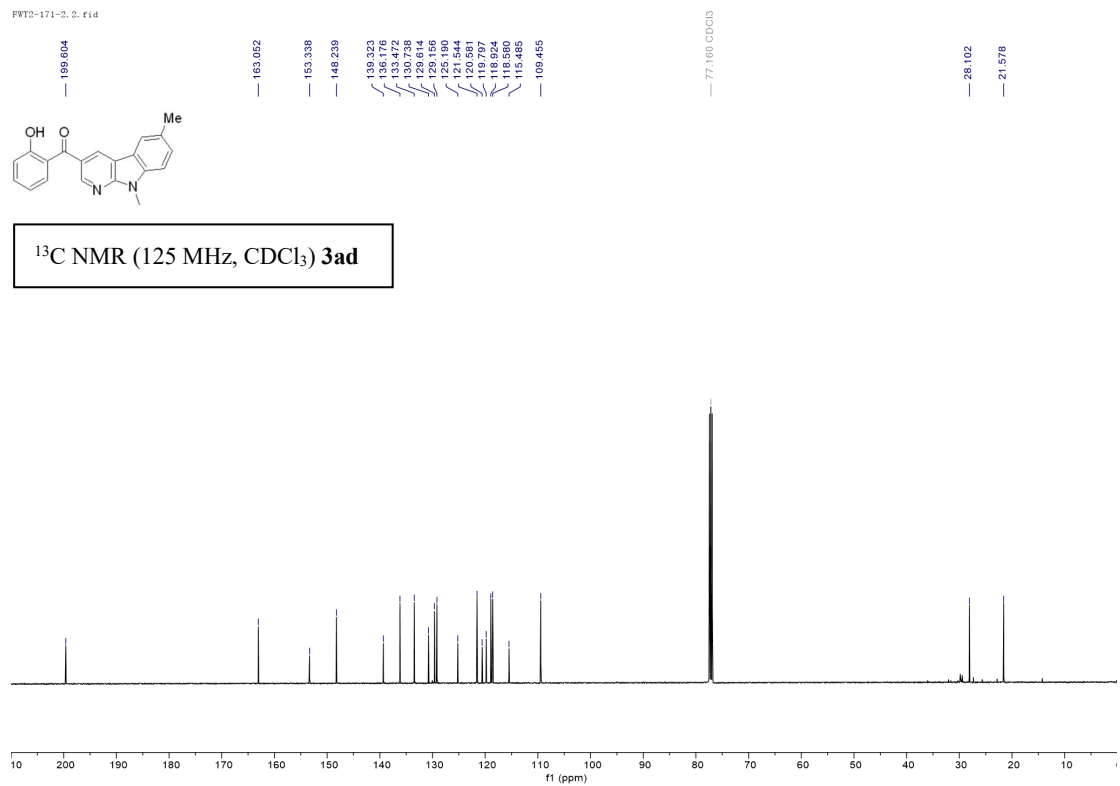

FIT2-180-2.1.r1d

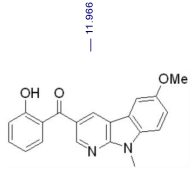

<sup>1</sup>H NMR (500 MHz, CDCl<sub>3</sub>) 3ae

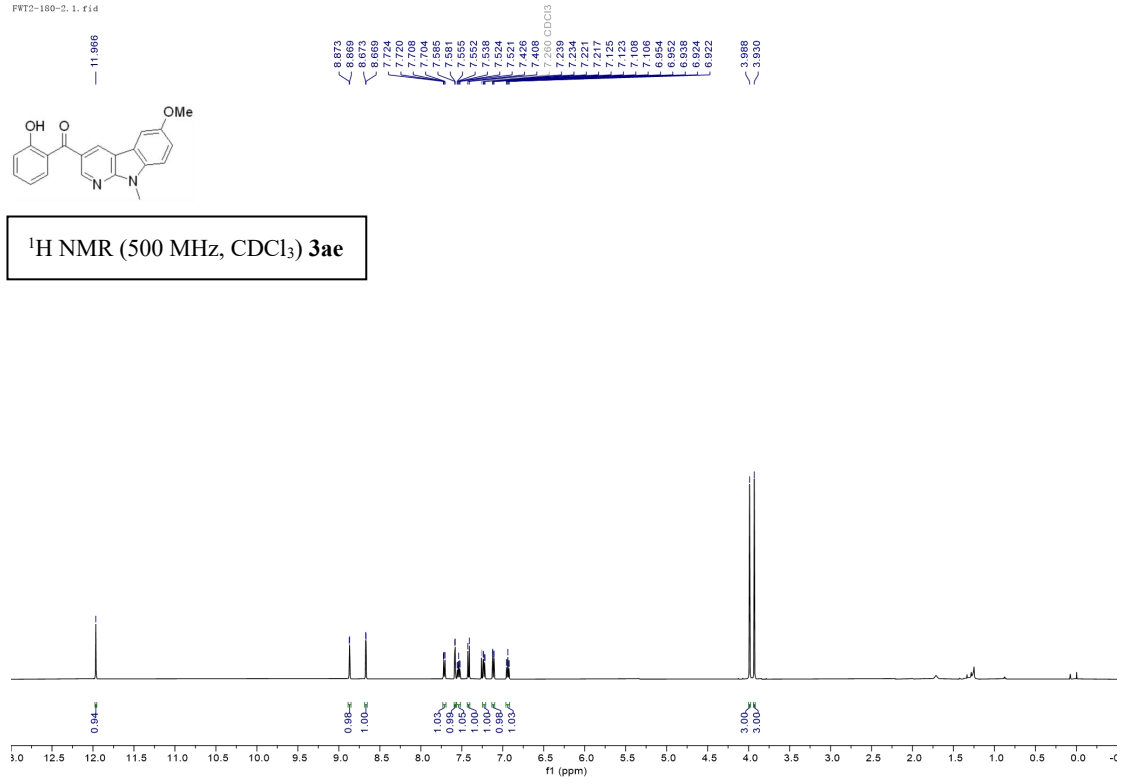

FIT2-180-2.2.r1d

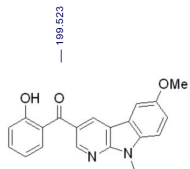

<sup>13</sup>C NMR (125 MHz, CDCl<sub>3</sub>) 3ae

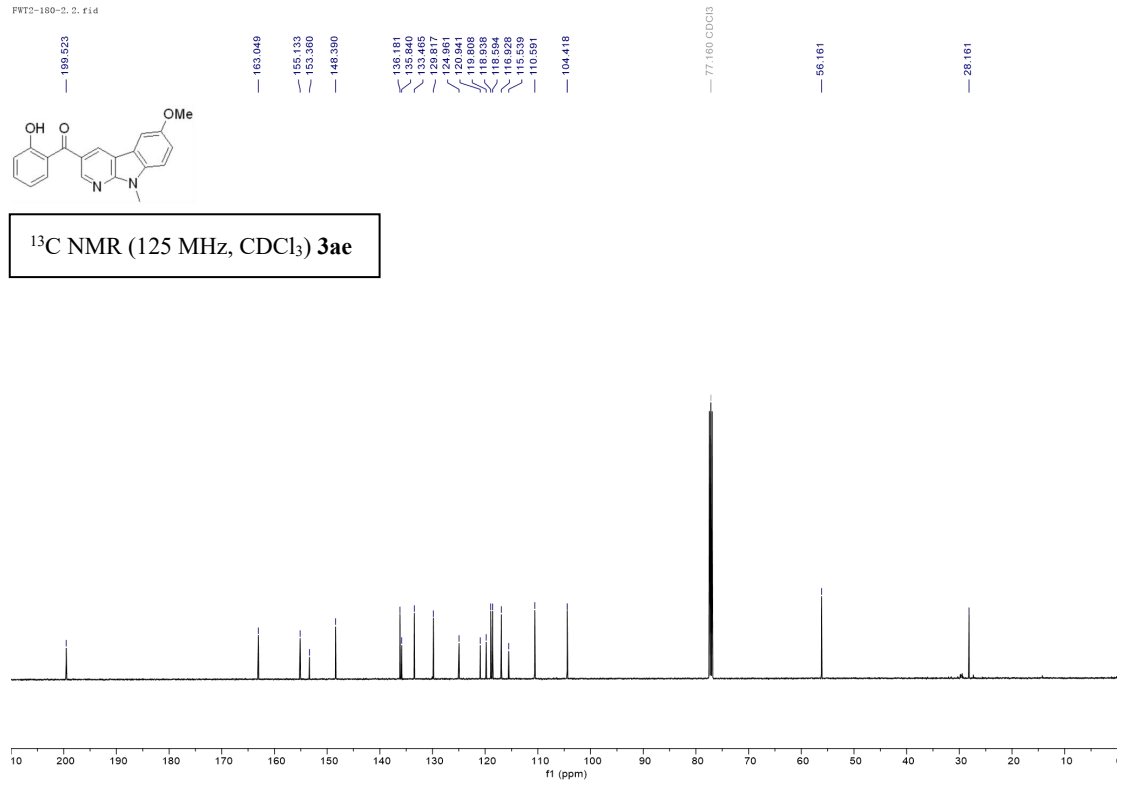

FWT2-182.1.fid

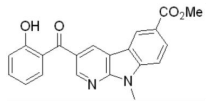

<sup>1</sup>H NMR (500 MHz, CDCl<sub>3</sub>) **3af**

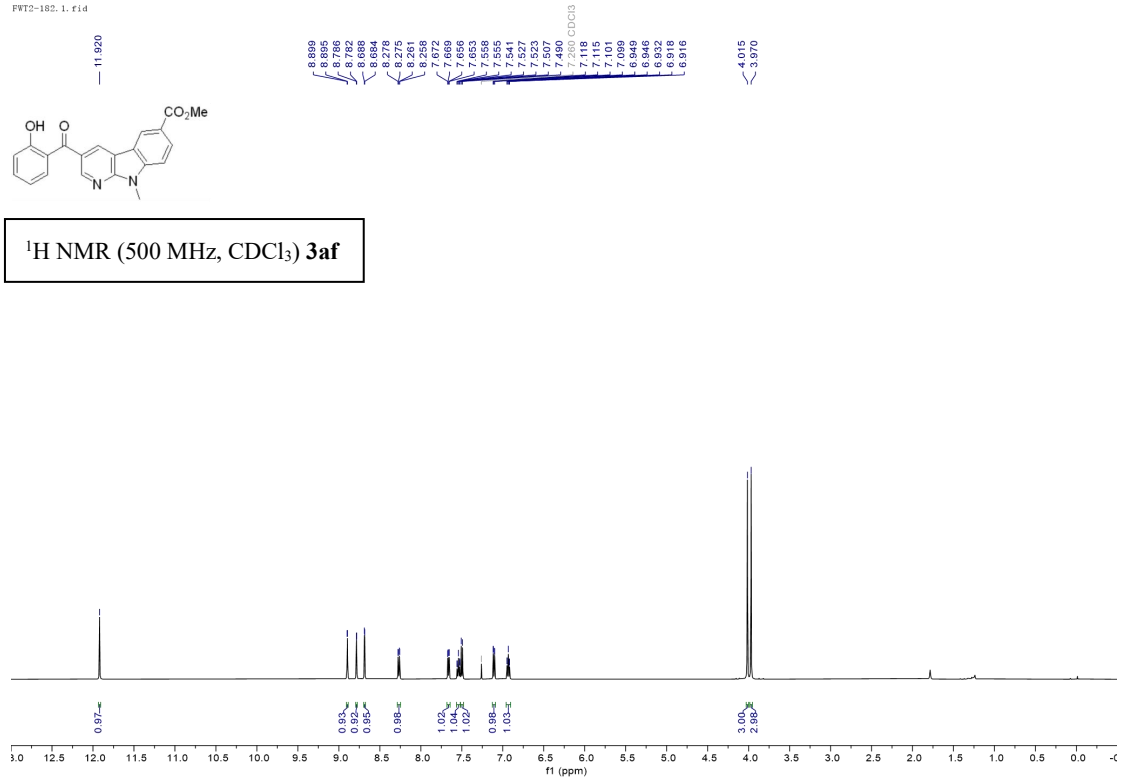

FWT2-182.2.fid

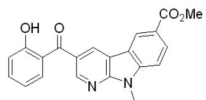

<sup>13</sup>C NMR (125 MHz, CDCl<sub>3</sub>) **3af**

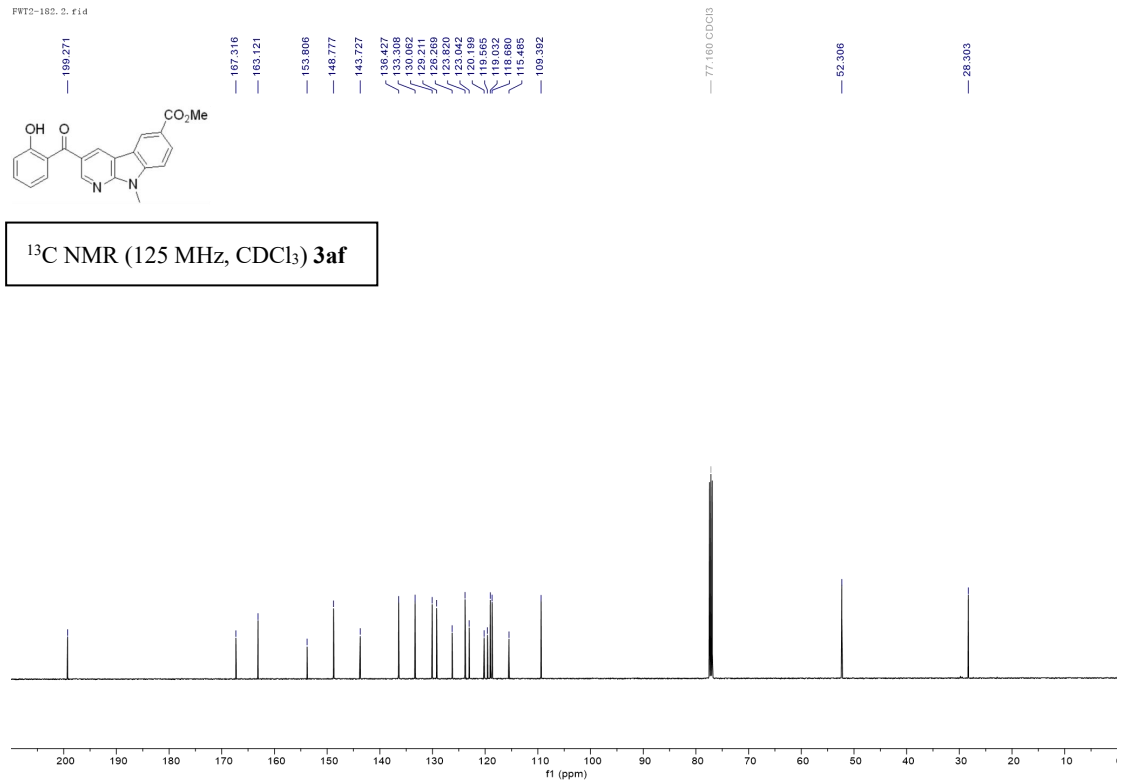

FWT2-168.1.fid

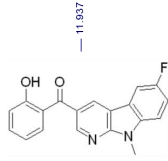

<sup>1</sup>H NMR (500 MHz, CDCl<sub>3</sub>) **3ag**

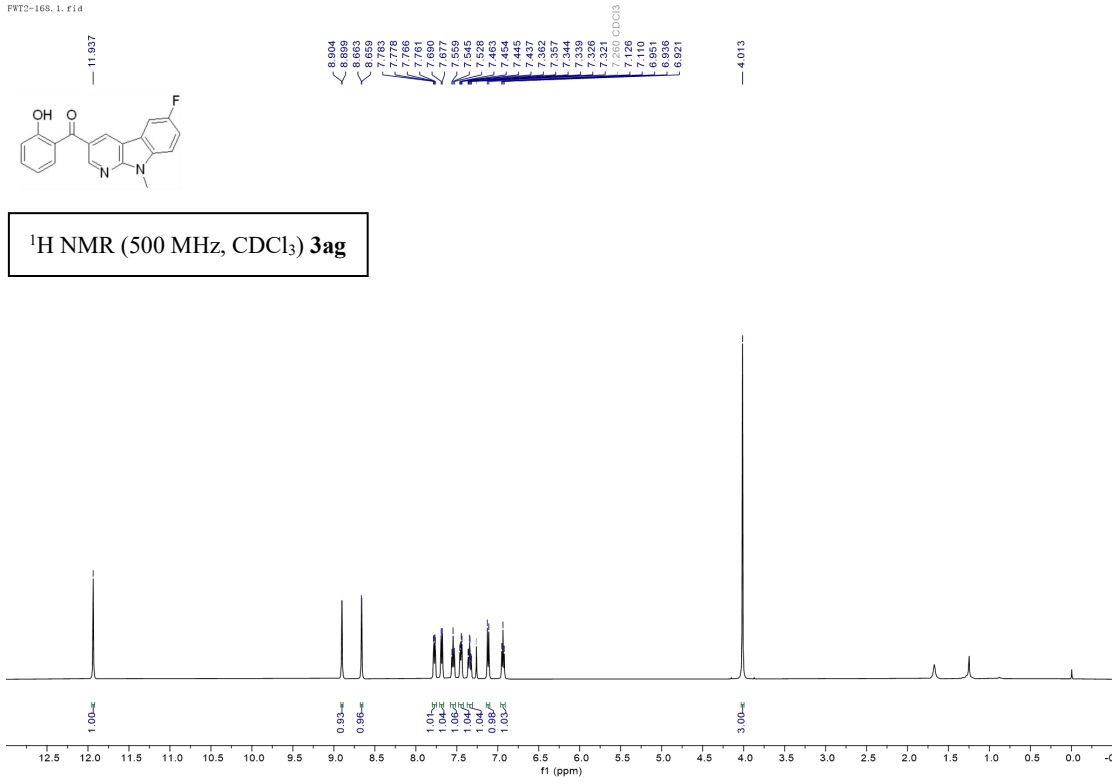

FWT2-168.2.fid

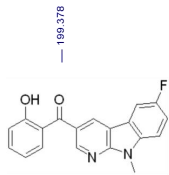

<sup>13</sup>C NMR (125 MHz, CDCl<sub>3</sub>) **3ag**

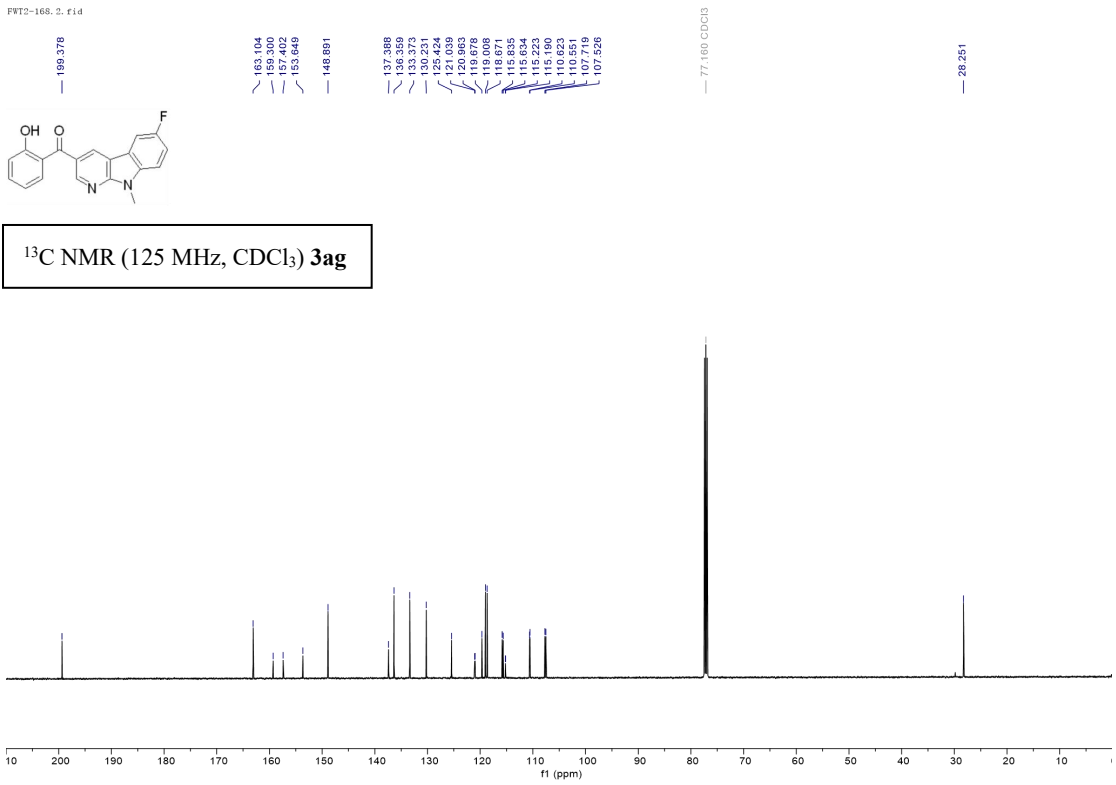

FYT2-168  
single\_pulse

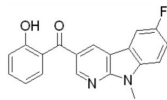

**<sup>19</sup>F NMR (376 MHz, CDCl<sub>3</sub>) 3ag**

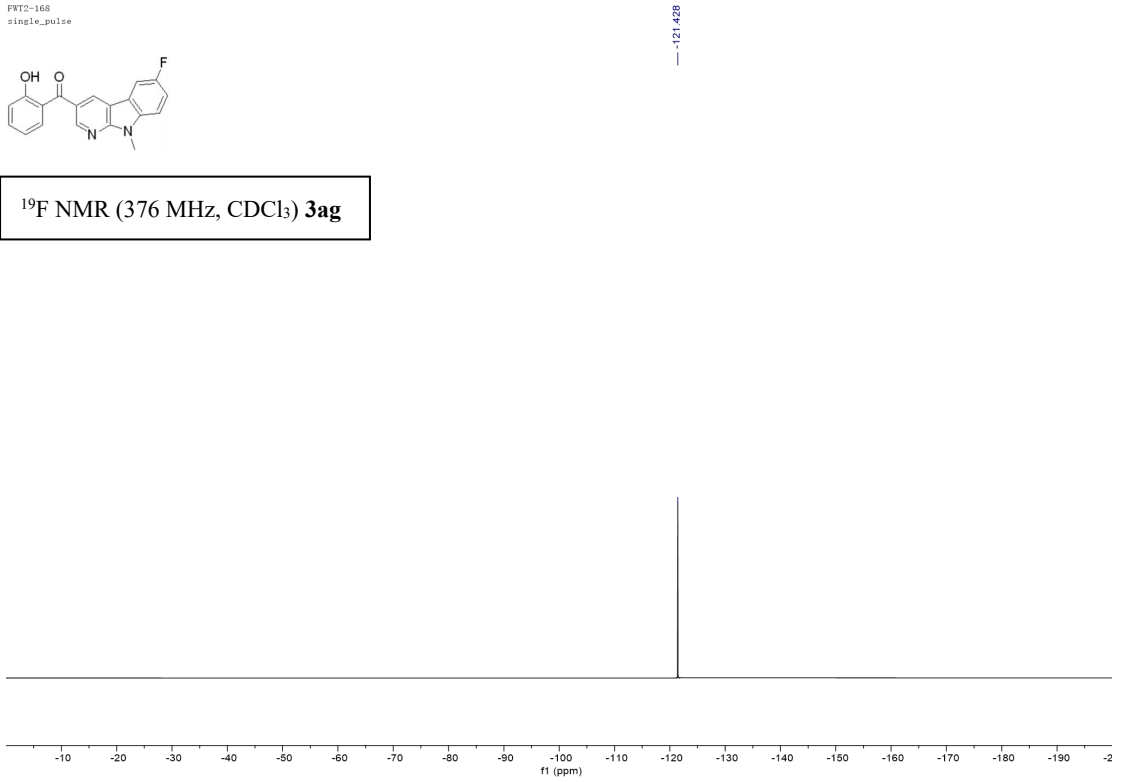

FYT-2-172.4.f1d

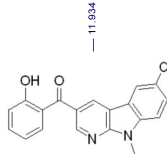

**<sup>1</sup>H NMR (500 MHz, CDCl<sub>3</sub>) 3ah**

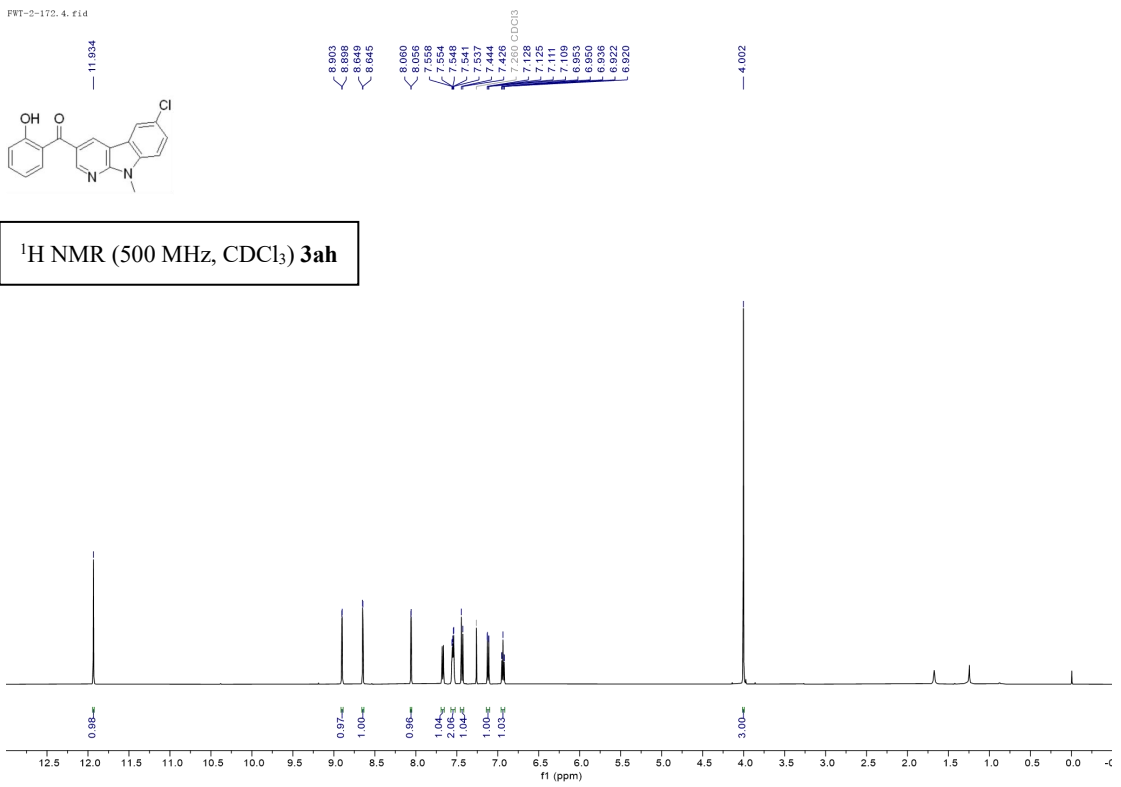

FWT-2-172. 5. f1.d

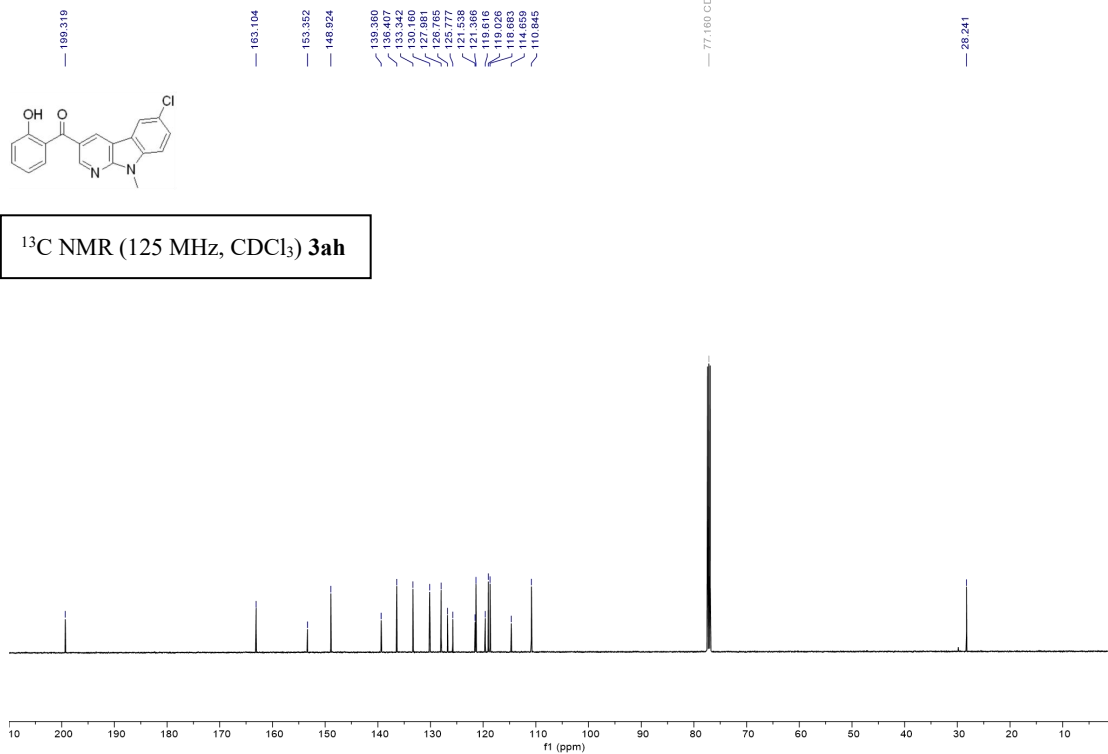

FWT2-173. 1. f1.d

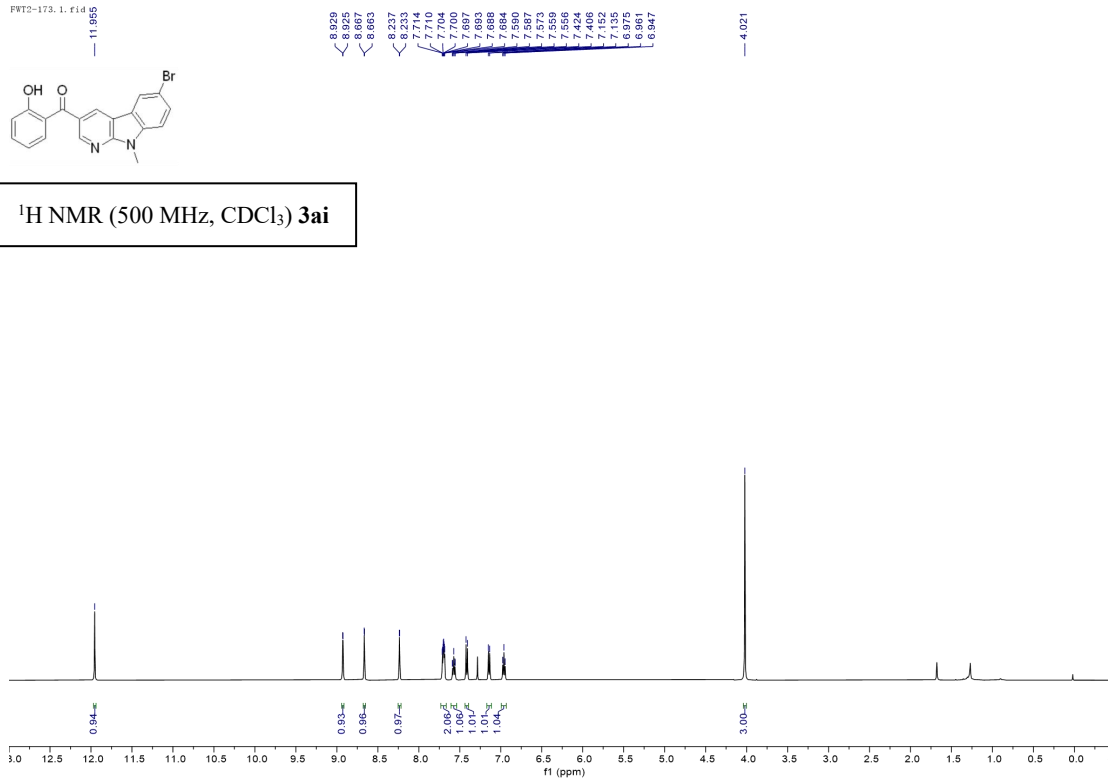

FT2-173. 2. fid

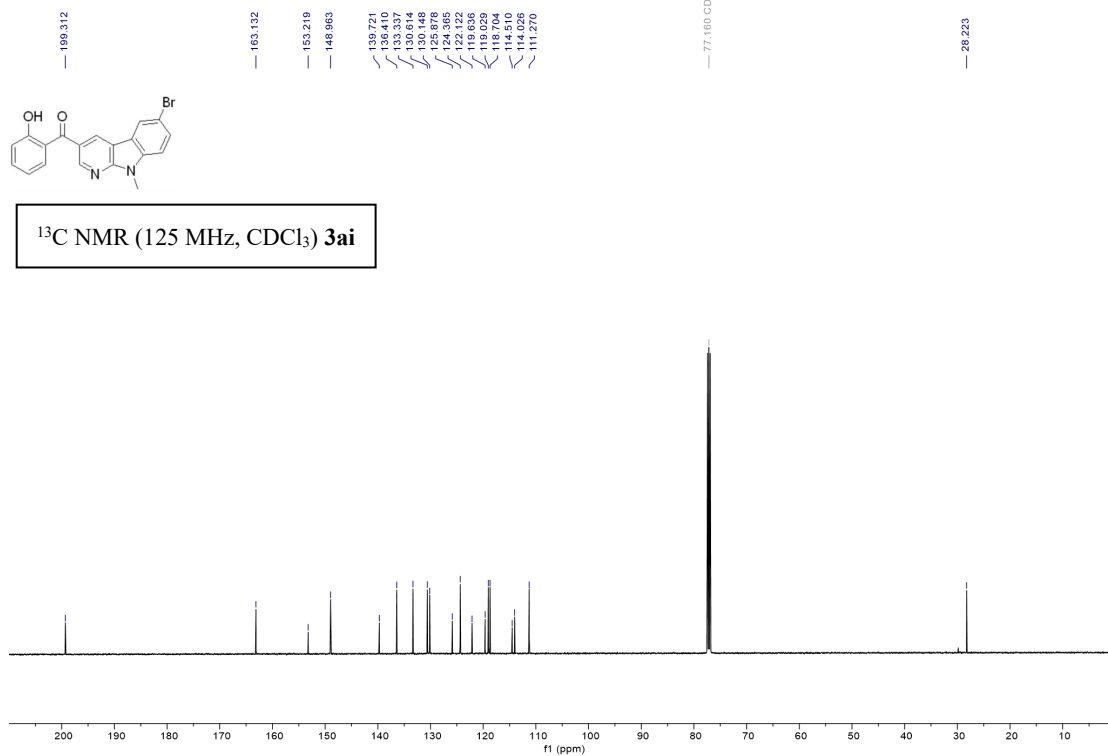

FT2-176. 1. fid

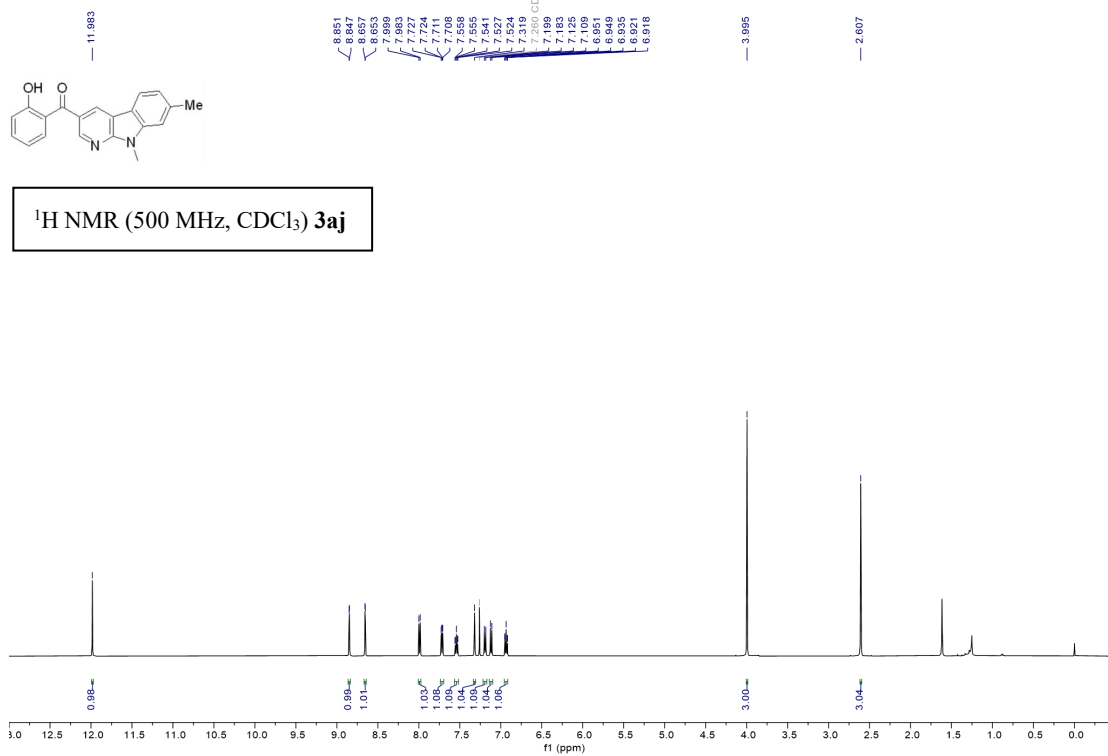

FT2-178.2.fid

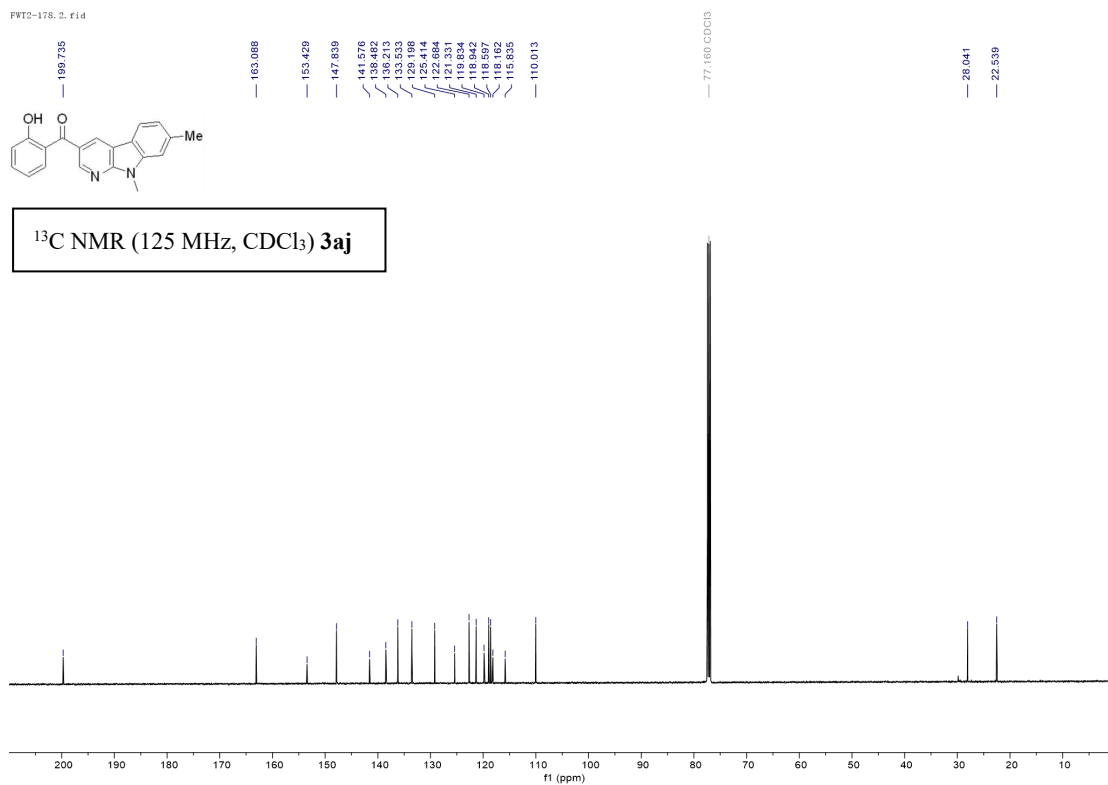

FT2-179.1.fid

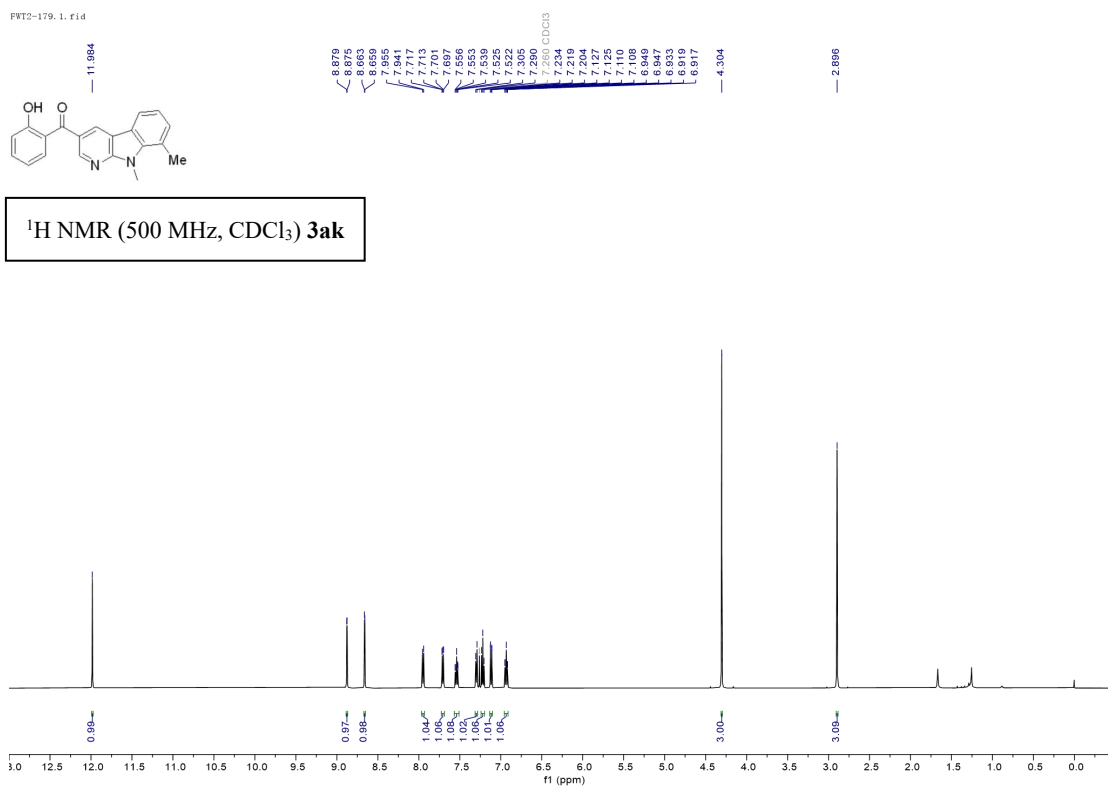

FT2-179. 2. fid

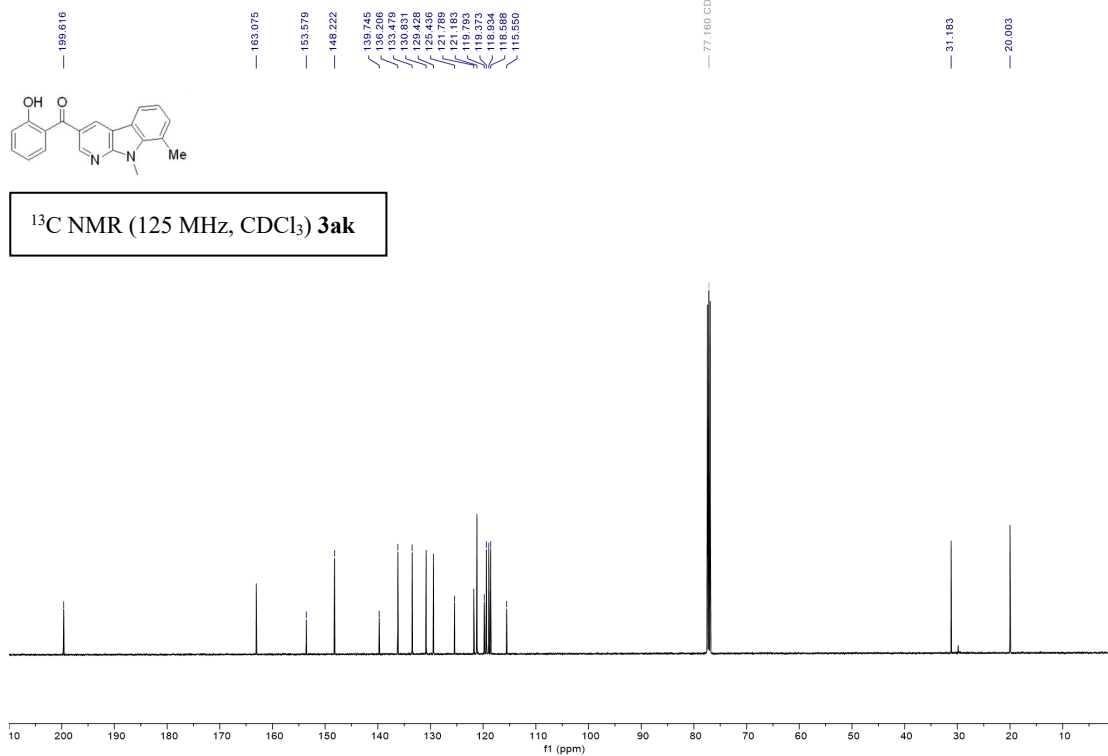

FT2-181. 1. fid

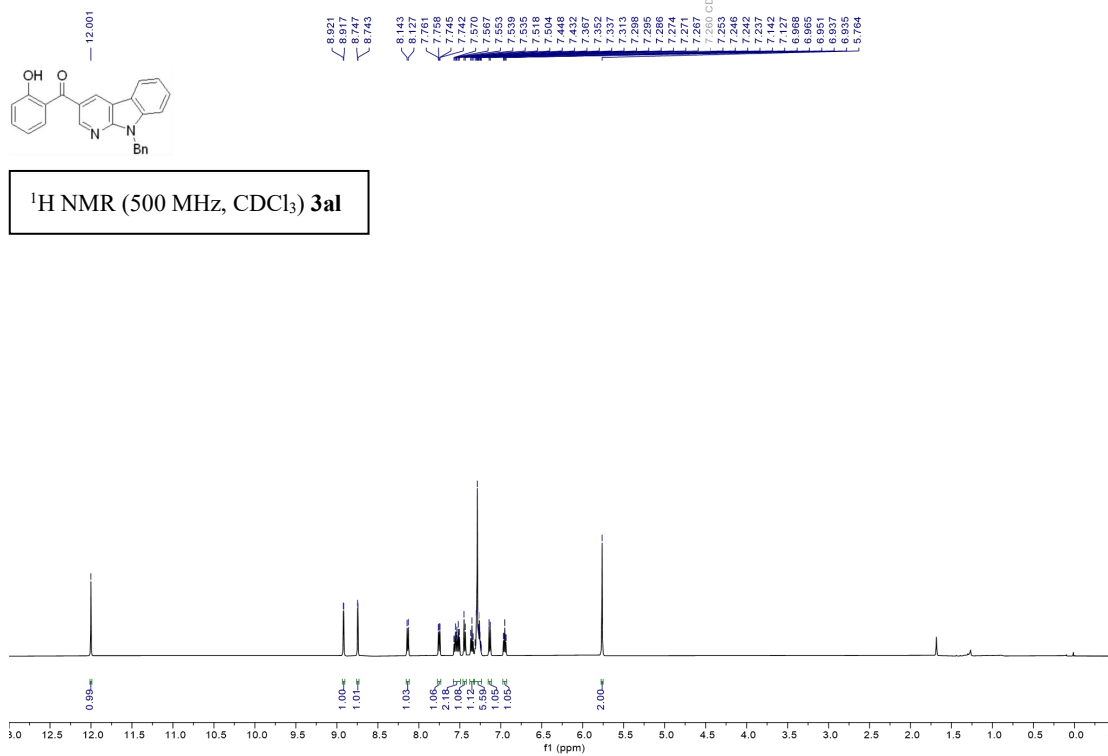

FIT2-181-2.fid

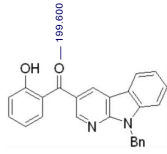

<sup>13</sup>C NMR (125 MHz, CDCl<sub>3</sub>) **3a**

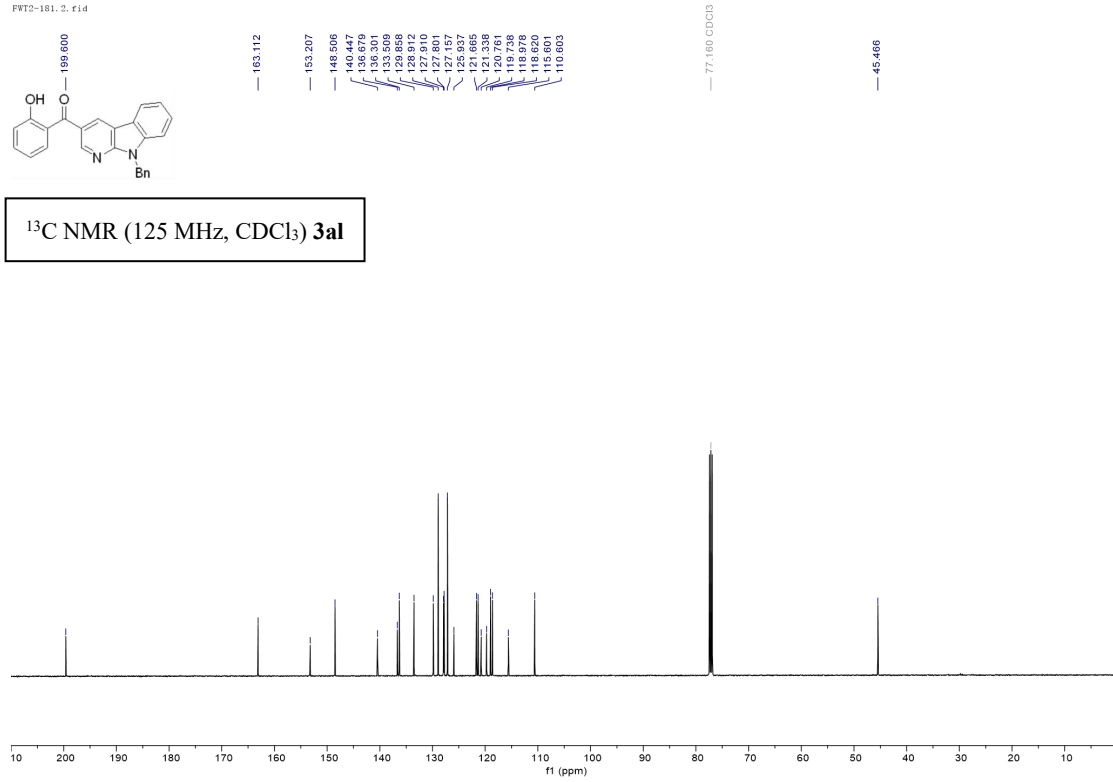

FIT2-147-1.1.fid

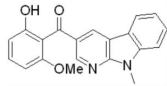

<sup>1</sup>H NMR (500 MHz, CDCl<sub>3</sub>) **3ba**

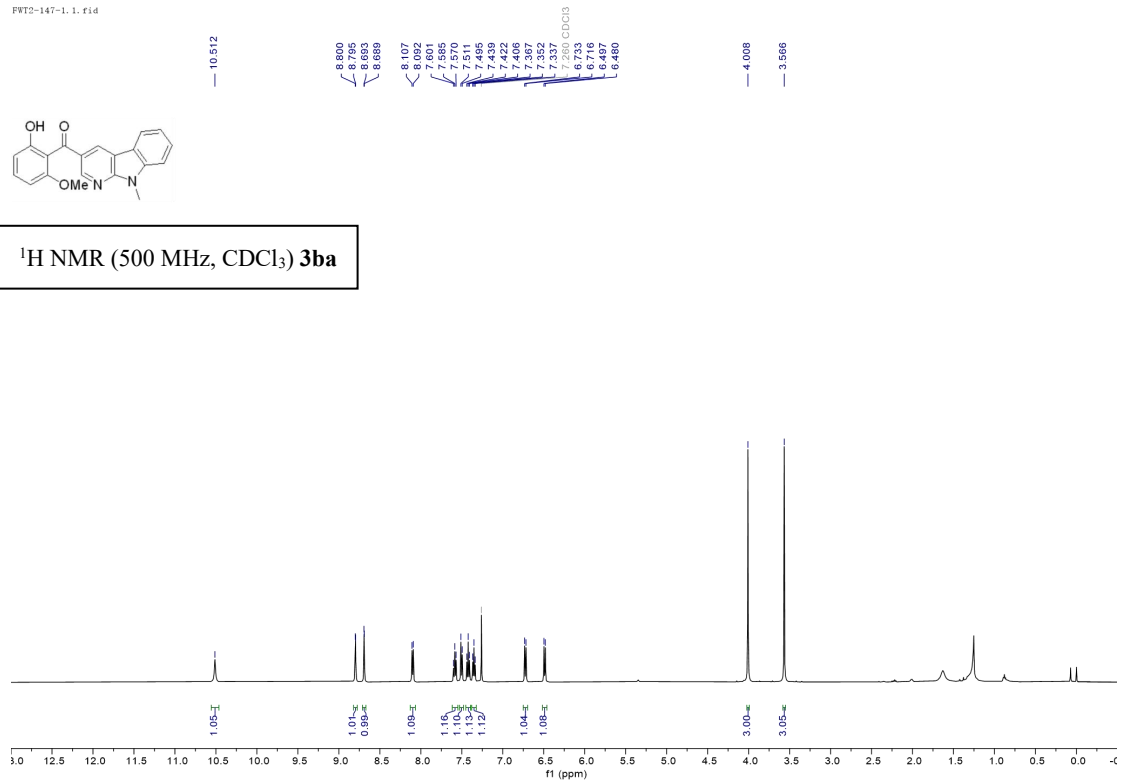

FWT2-147-1.2.rid

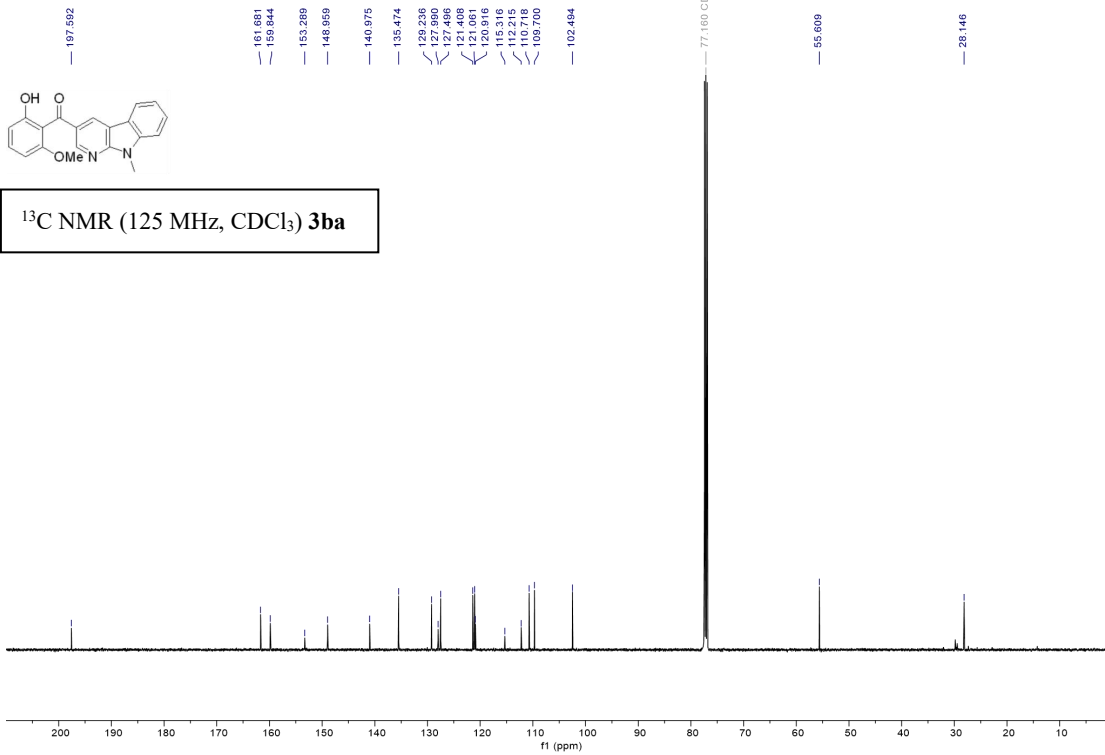

FWT2-158-2.1.rid

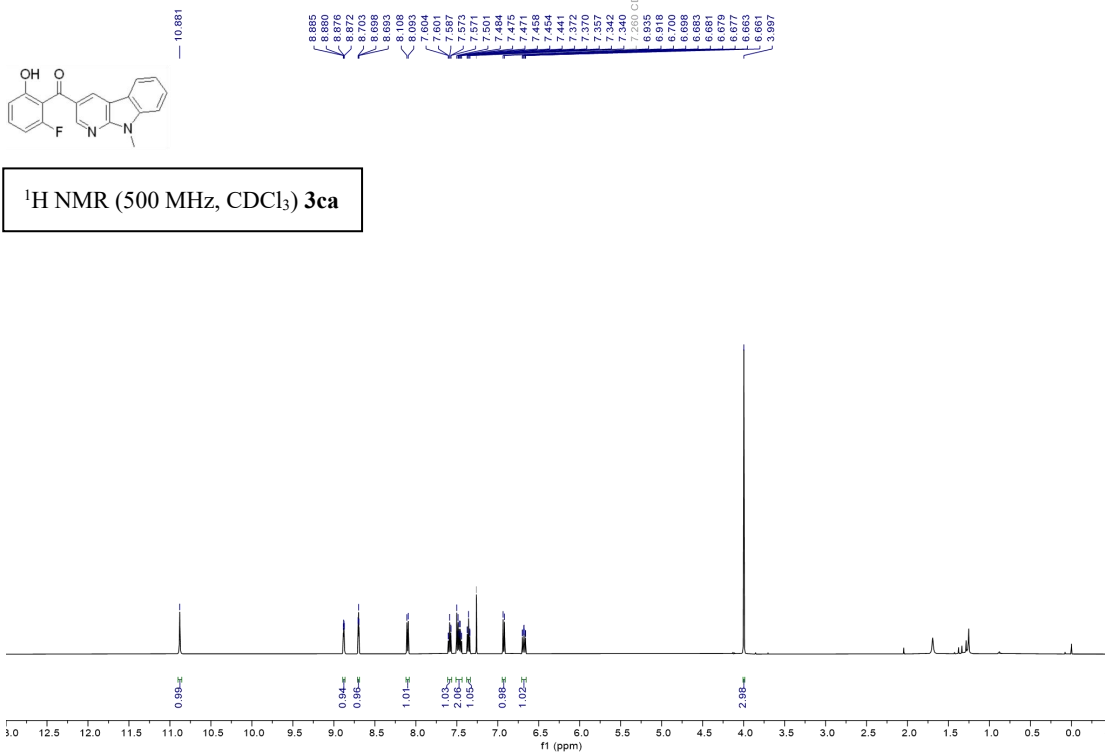

FPT2-158-2.2.rid

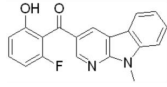

$^{13}\text{C}$  NMR (125 MHz,  $\text{CDCl}_3$ ) **3ca**

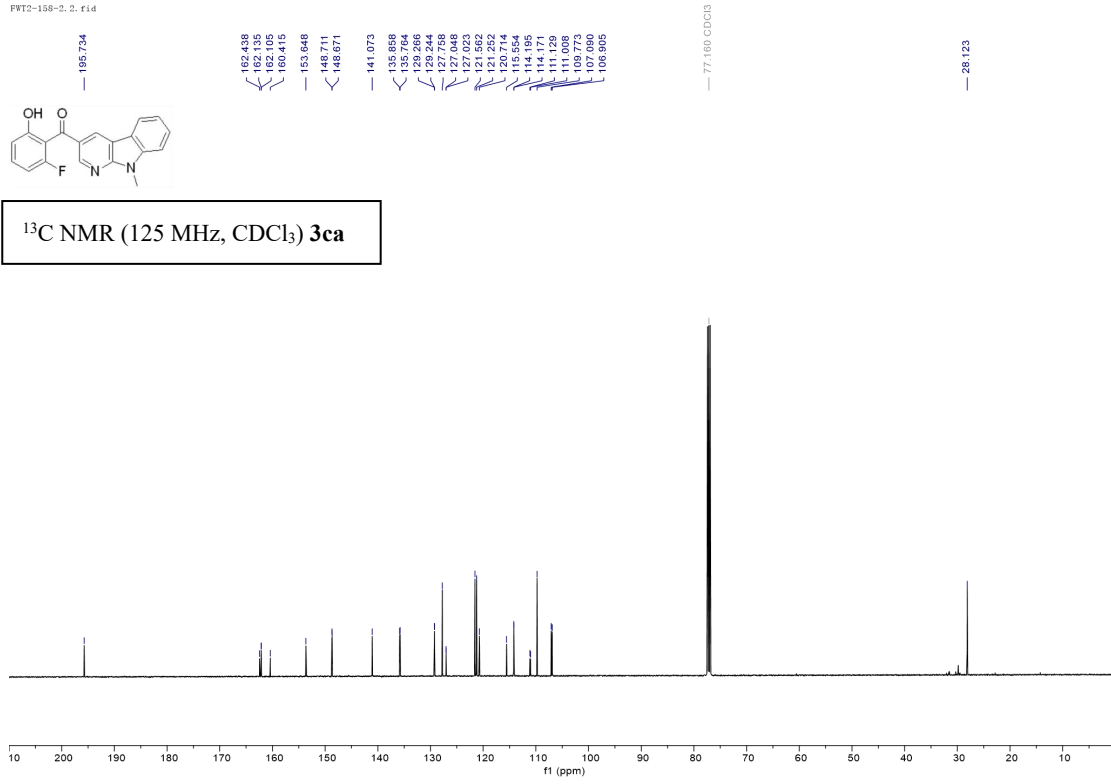

FPT2-158-2  
single\_pulse

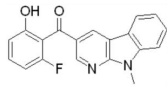

$^{19}\text{F}$  NMR (376 MHz,  $\text{CDCl}_3$ ) **3ca**

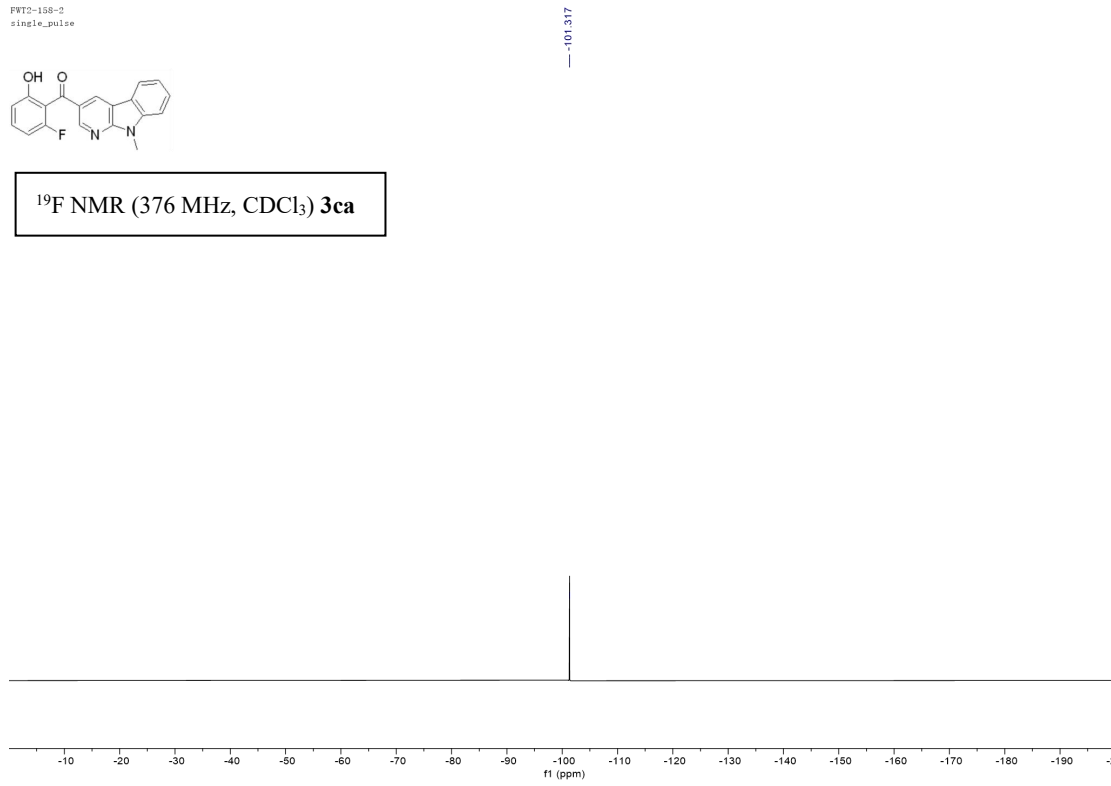

FPT2-151.1.fid

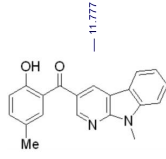

**<sup>1</sup>H NMR (500 MHz, CDCl<sub>3</sub>) 3da**

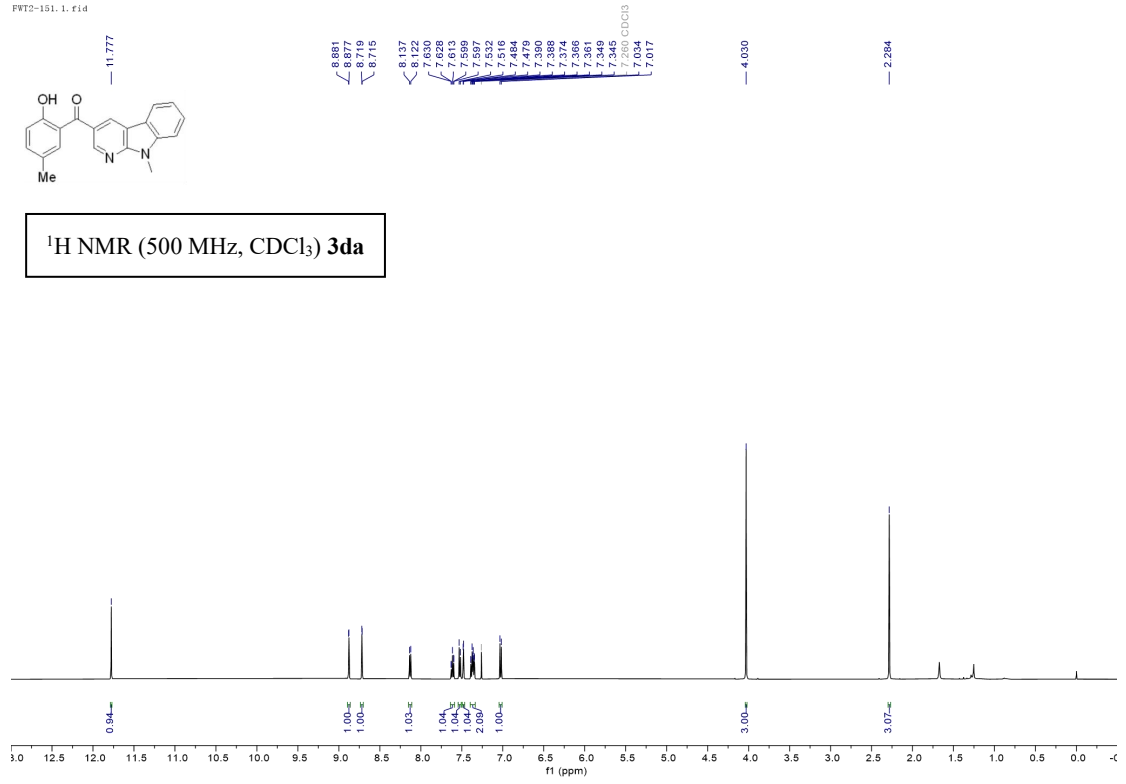

FPT2-151.2.fid

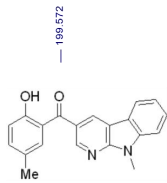

**<sup>13</sup>C NMR (125 MHz, CDCl<sub>3</sub>) 3da**

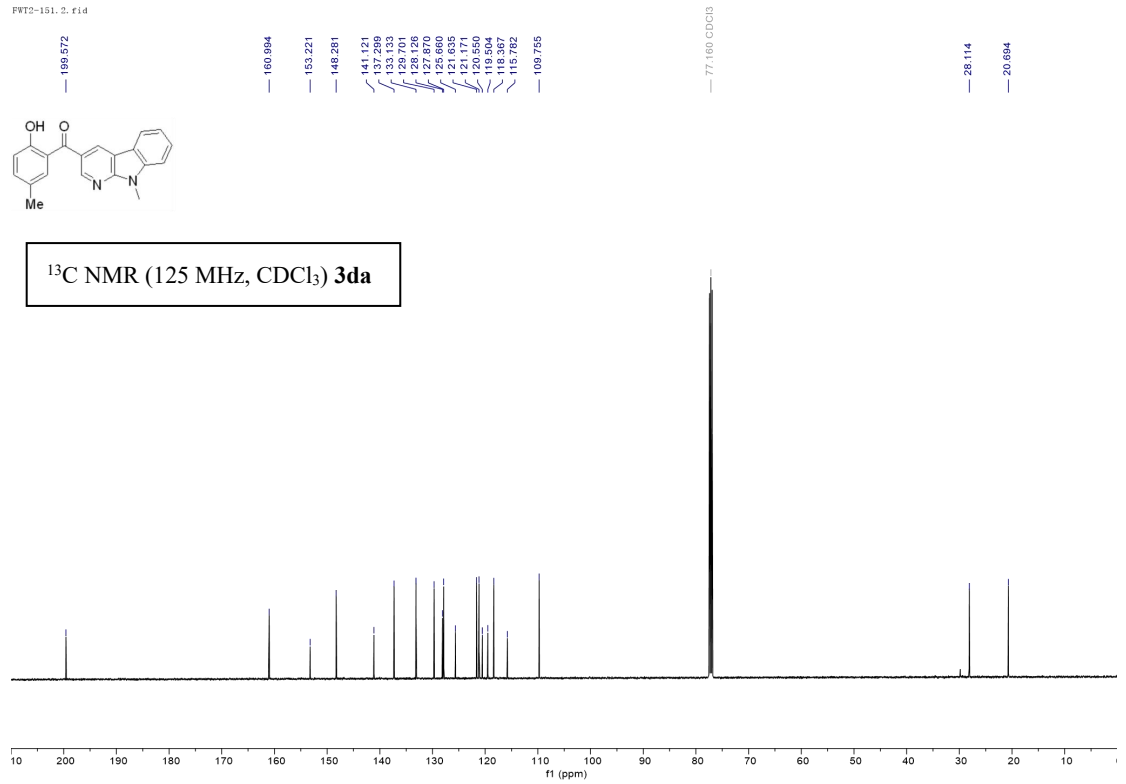

FT2-166.1.fid

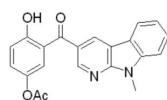

<sup>1</sup>H NMR (500 MHz, CDCl<sub>3</sub>) **3ea**

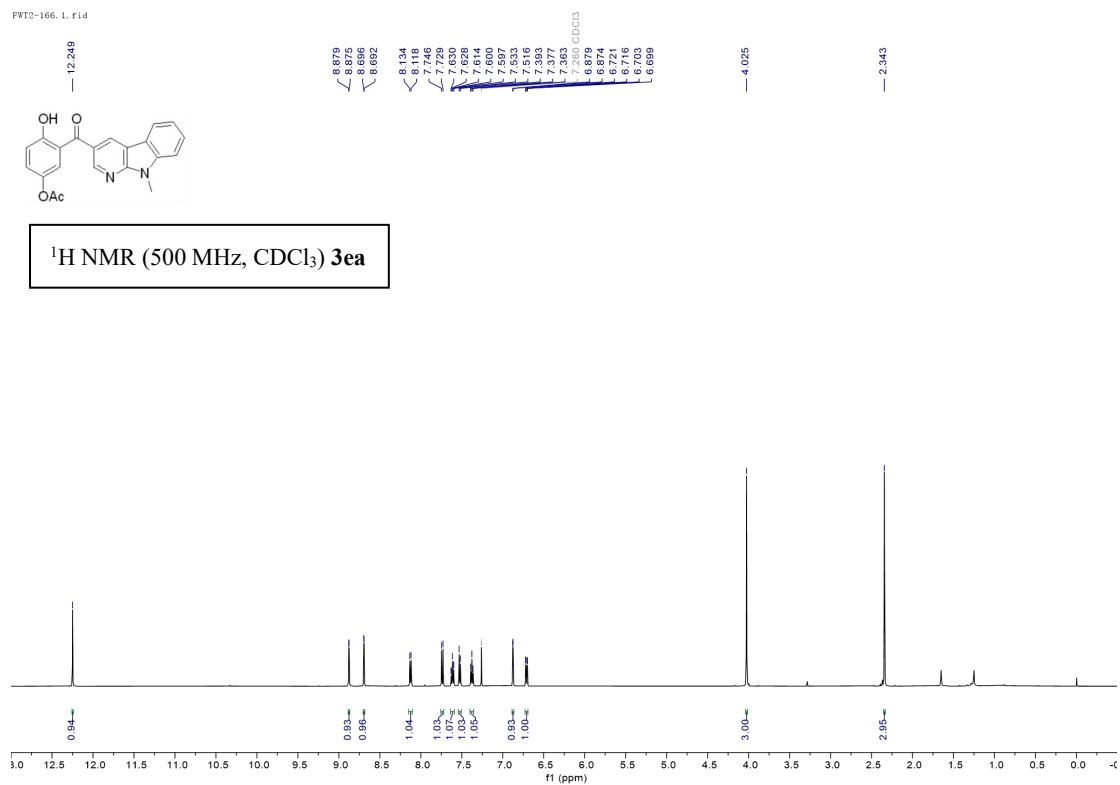

FT2-166.2.fid

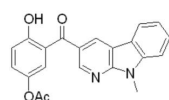

<sup>13</sup>C NMR (125 MHz, CDCl<sub>3</sub>) **3ea**

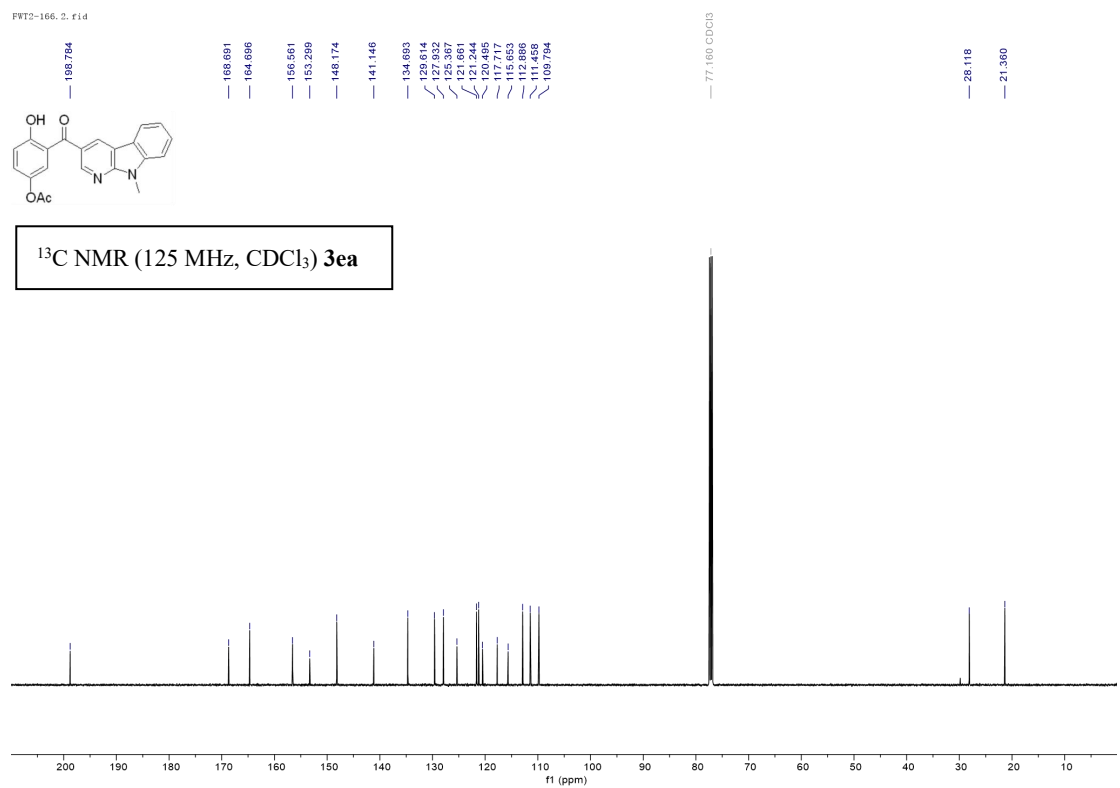

F01-2-149.1.fid

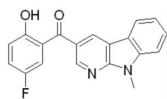

**<sup>1</sup>H NMR (500 MHz, CDCl<sub>3</sub>) 3fa**

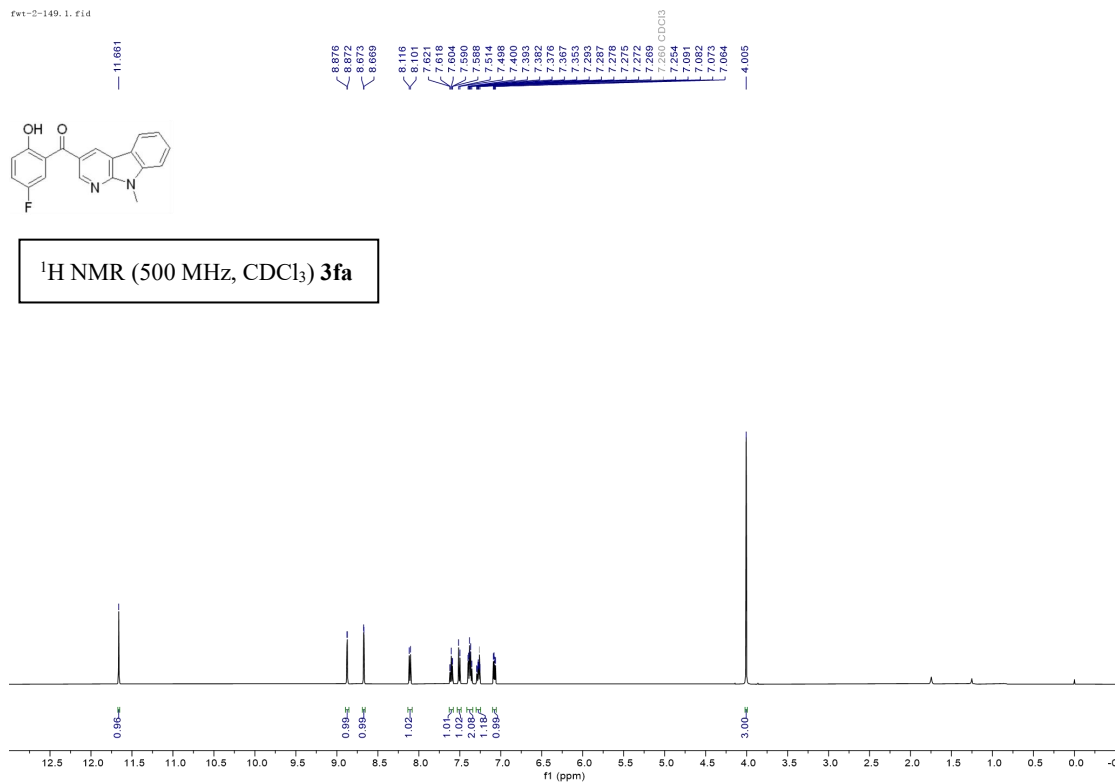

F01-2-149.2.fid

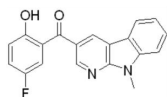

**<sup>13</sup>C NMR (125 MHz, CDCl<sub>3</sub>) 3fa**

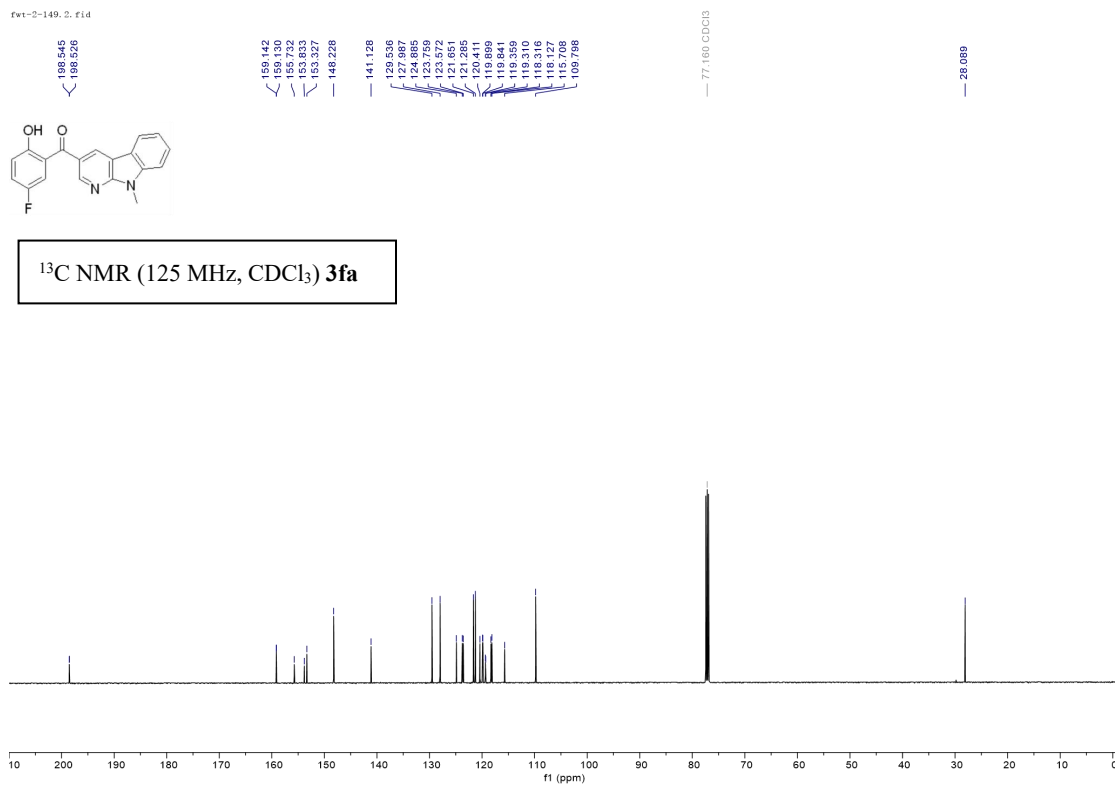

FPT2-149  
single\_pulse

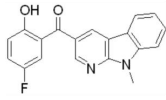

$^{19}\text{F}$  NMR (376 MHz,  $\text{CDCl}_3$ ) **3fa**

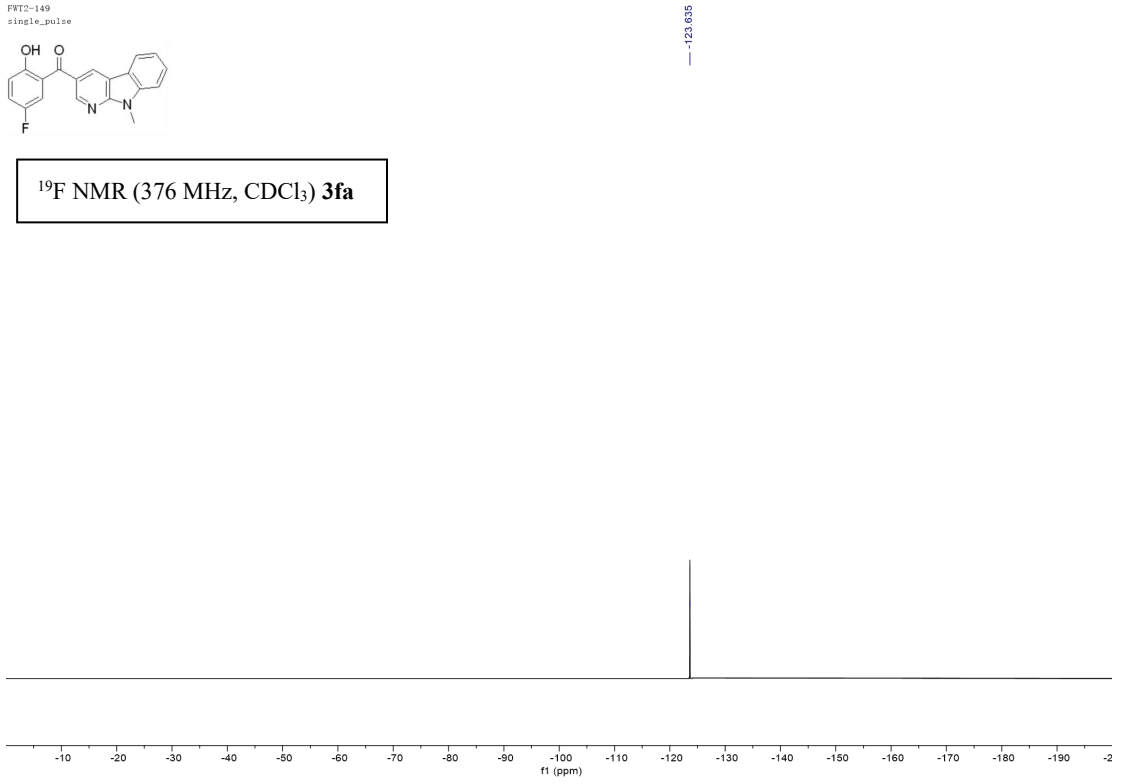

FPT2-148.1.fid

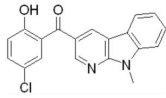

$^1\text{H}$  NMR (500 MHz,  $\text{CDCl}_3$ ) **3ga**

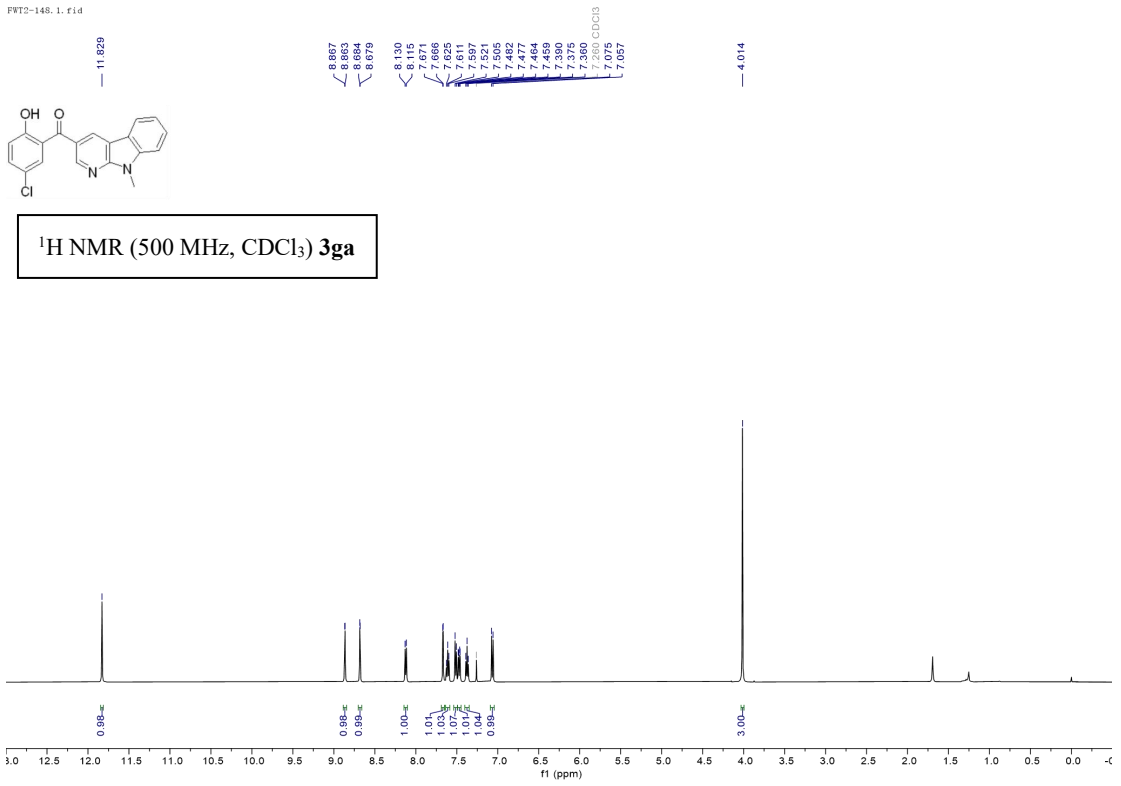

FT2-148.2.fid

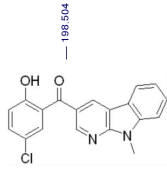

**<sup>13</sup>C NMR (125 MHz, CDCl<sub>3</sub>) 3ga**

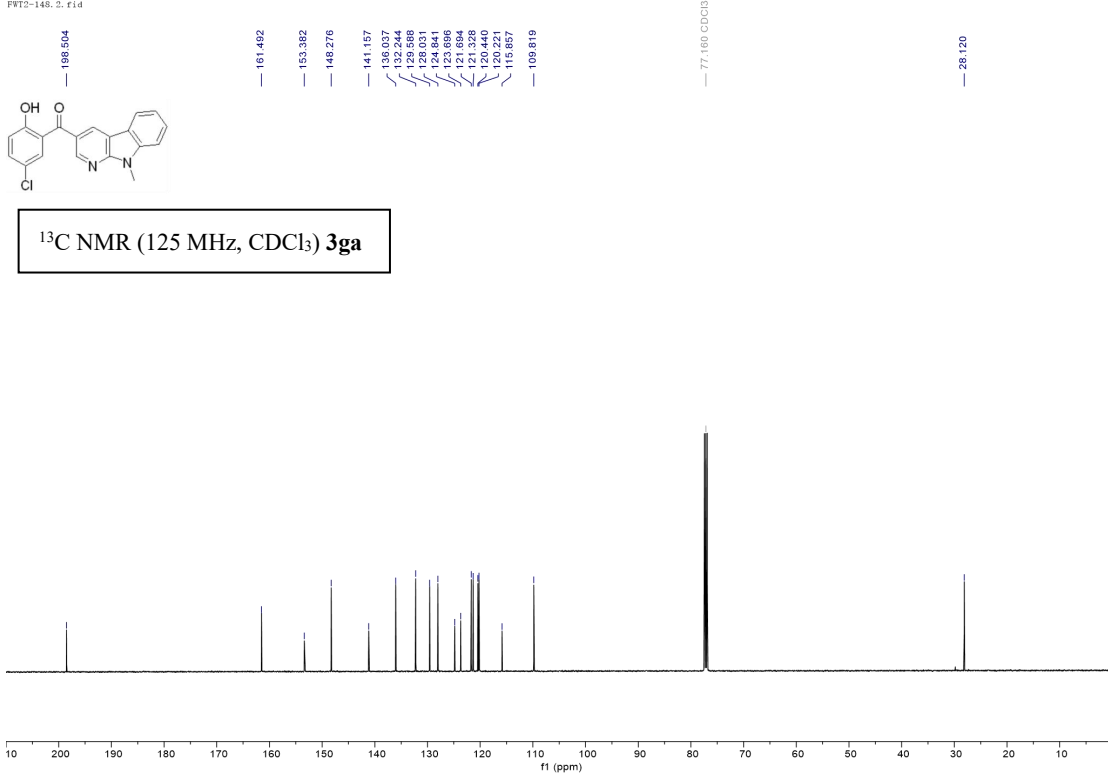

fw1-2-150.1.fid

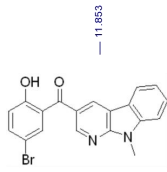

**<sup>1</sup>H NMR (500 MHz, CDCl<sub>3</sub>) 3ha**

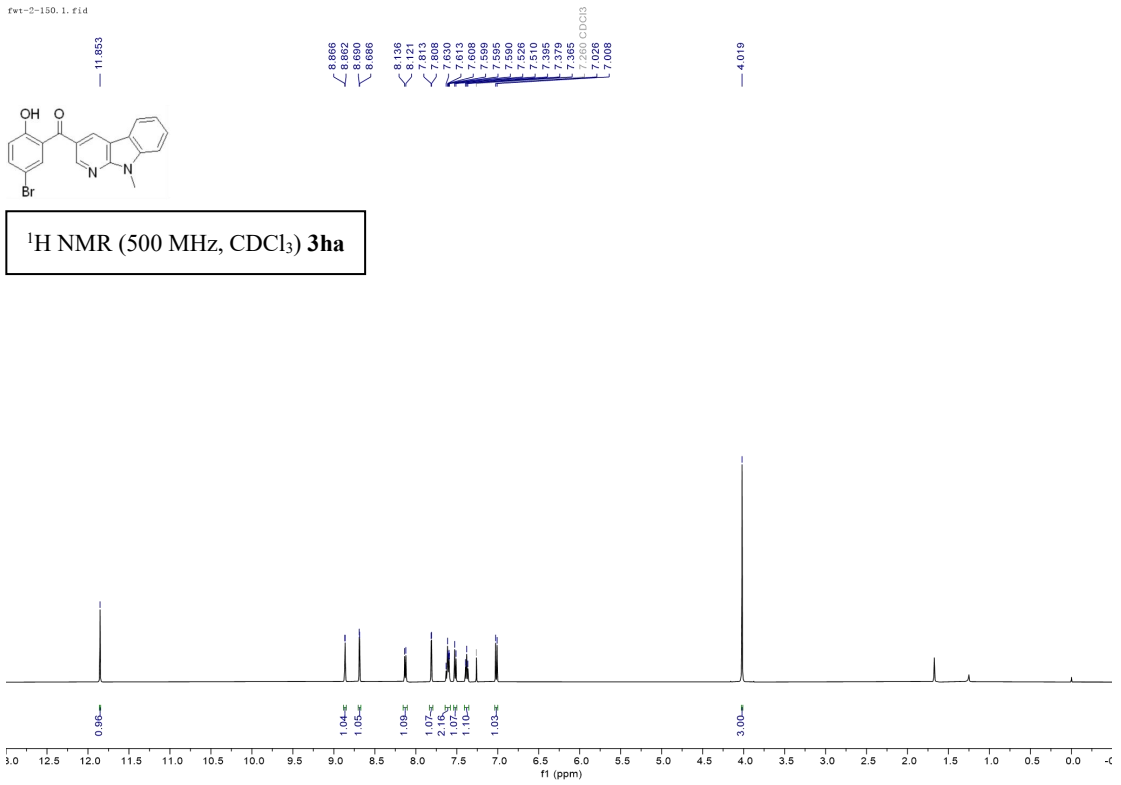

F01-2-150.2.f1d

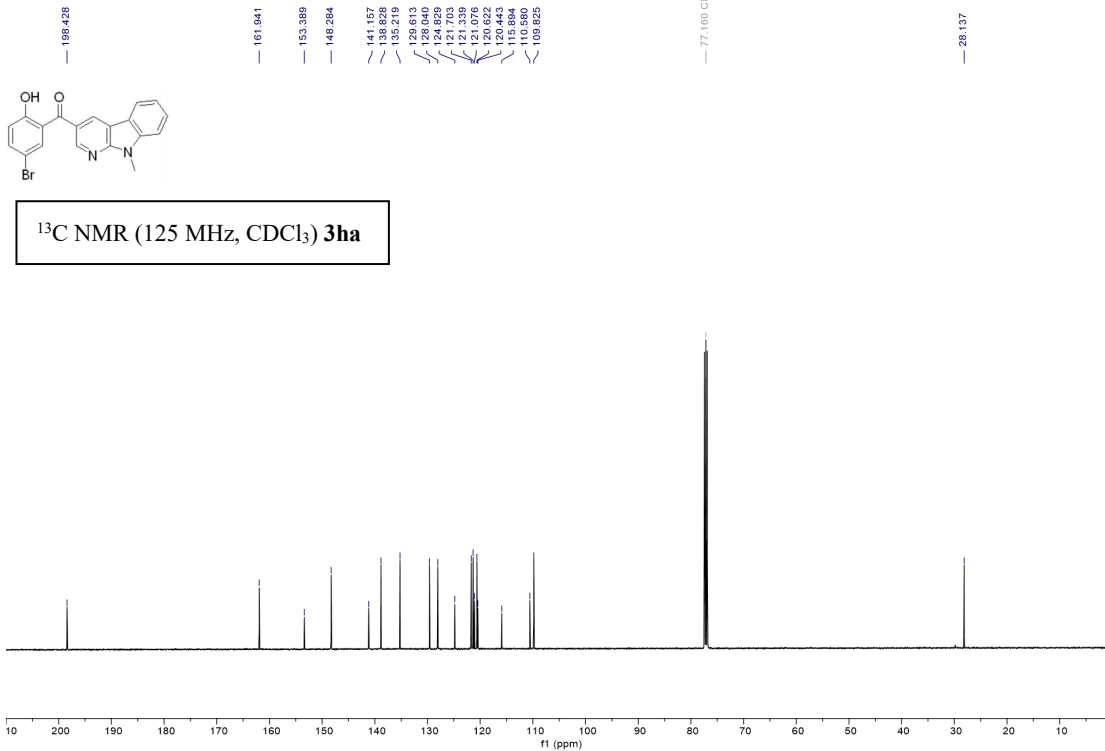

F02-150-2.1.f1d

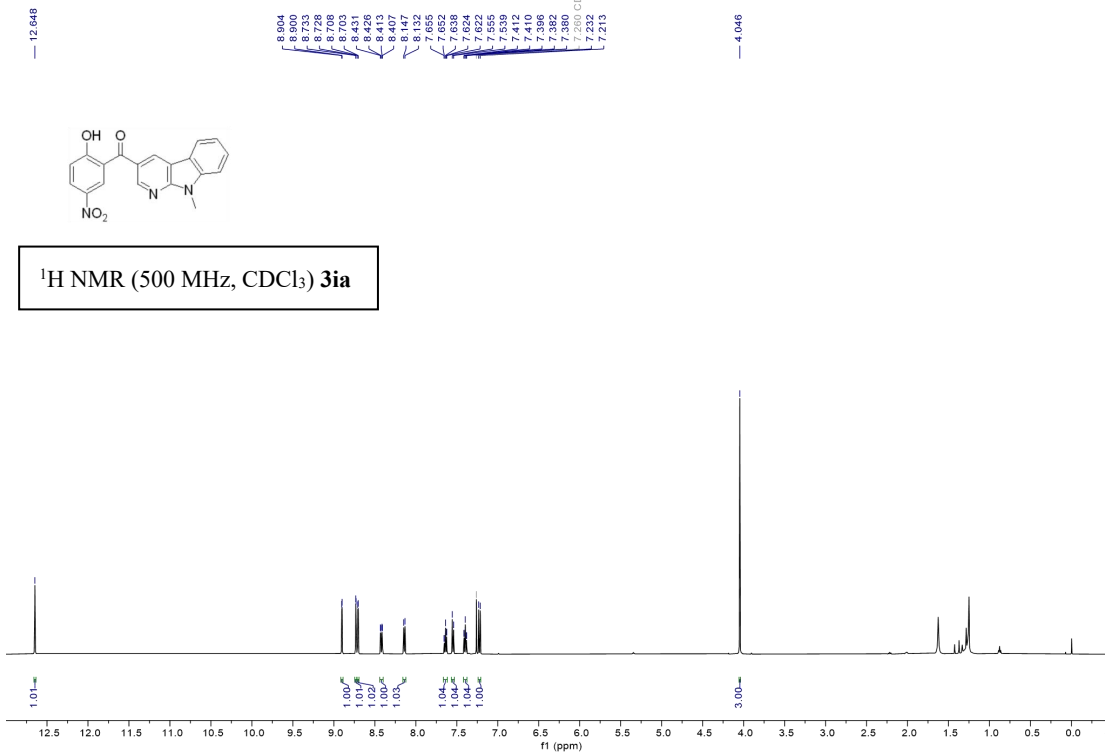

FT2-152-2.2.fid

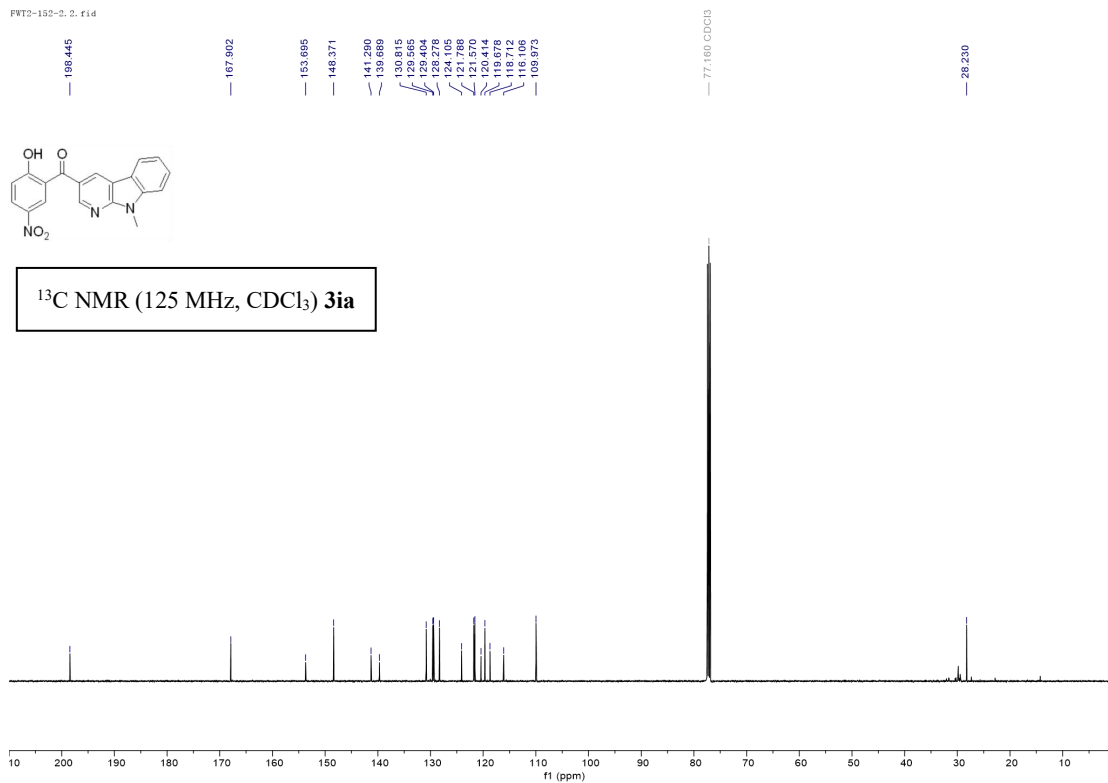

FT2-153.1.fid

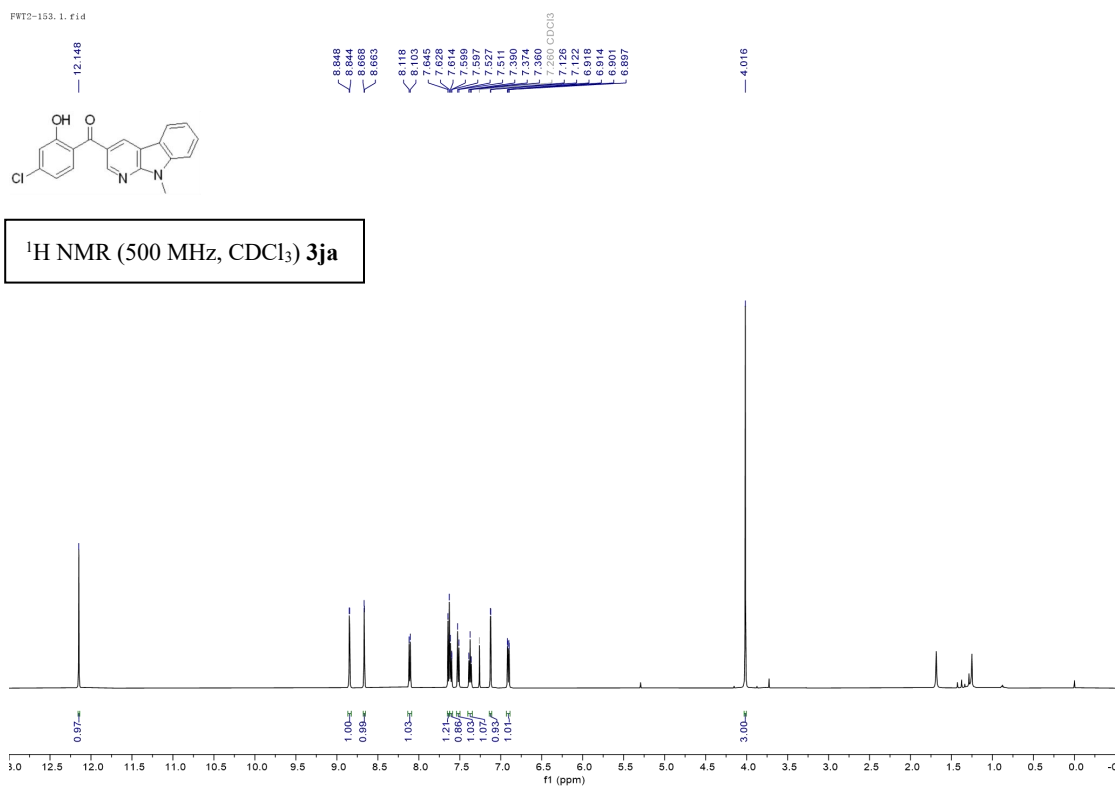

FPT2-153-2.1.rid

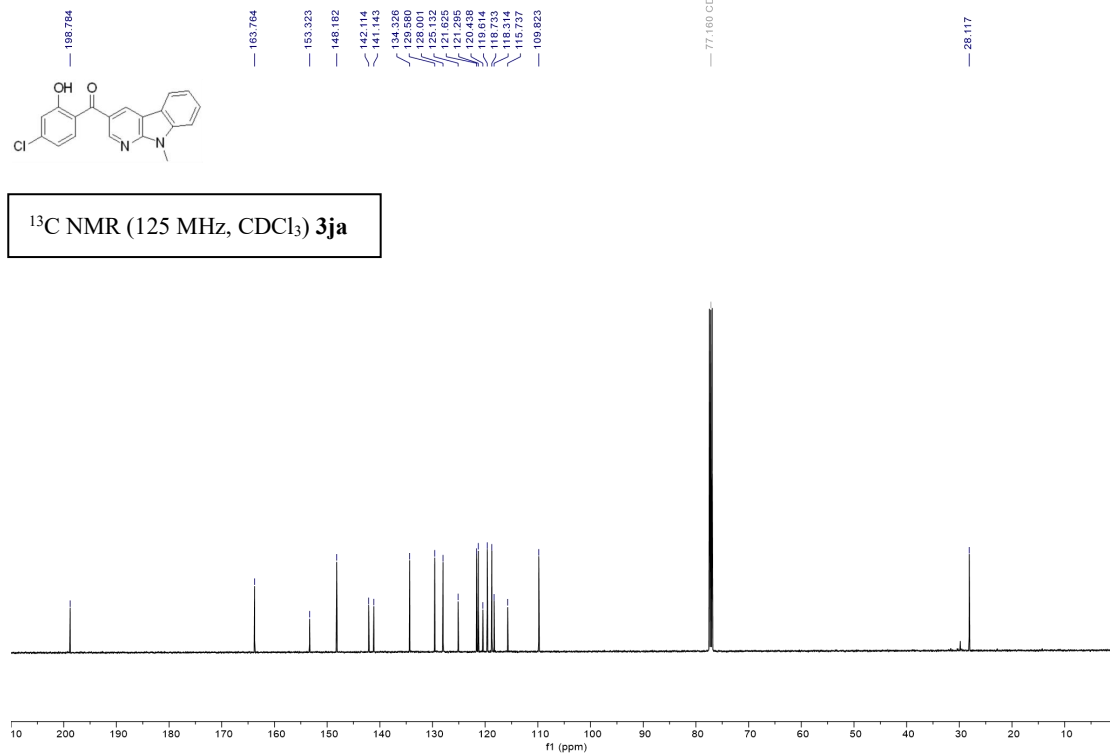

$^{13}\text{C}$  NMR (125 MHz,  $\text{CDCl}_3$ ) **3ja**

FPT2-154-2.1.rid

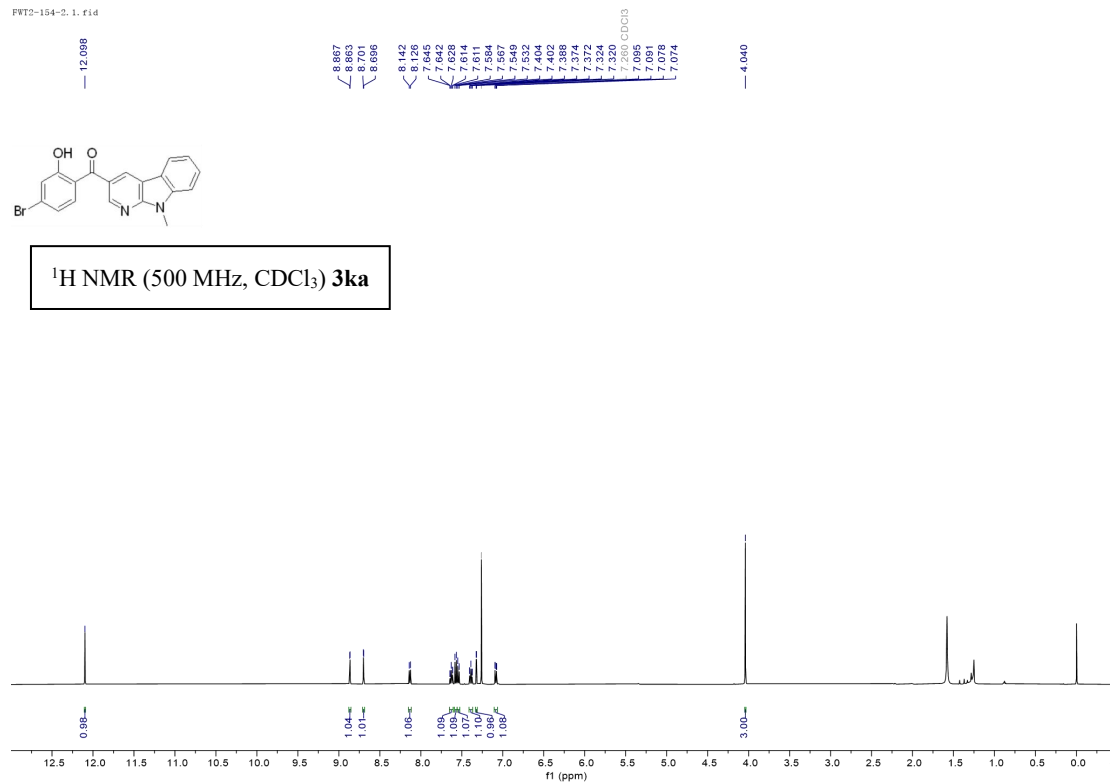

$^1\text{H}$  NMR (500 MHz,  $\text{CDCl}_3$ ) **3ka**

FPT2-154-2.0.fid

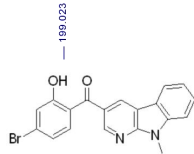

<sup>13</sup>C NMR (125 MHz, CDCl<sub>3</sub>) **3ka**

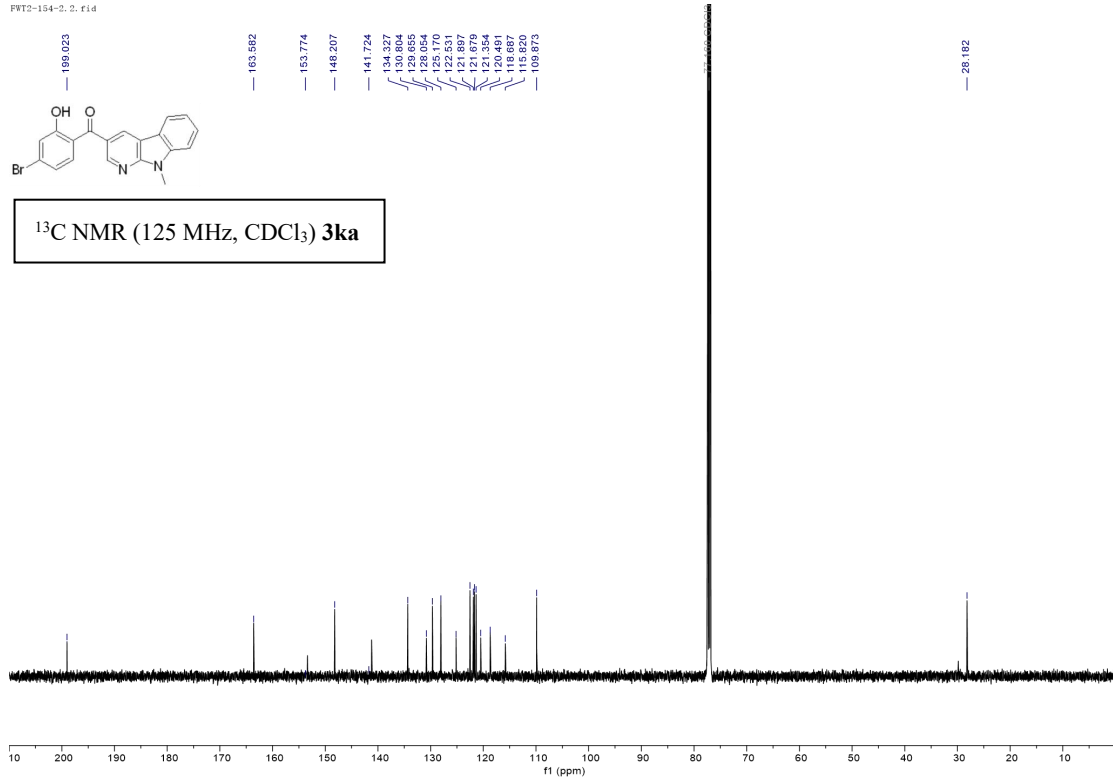

FPT2-155.1.fid

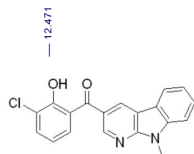

<sup>1</sup>H NMR (500 MHz, CDCl<sub>3</sub>) **3la**

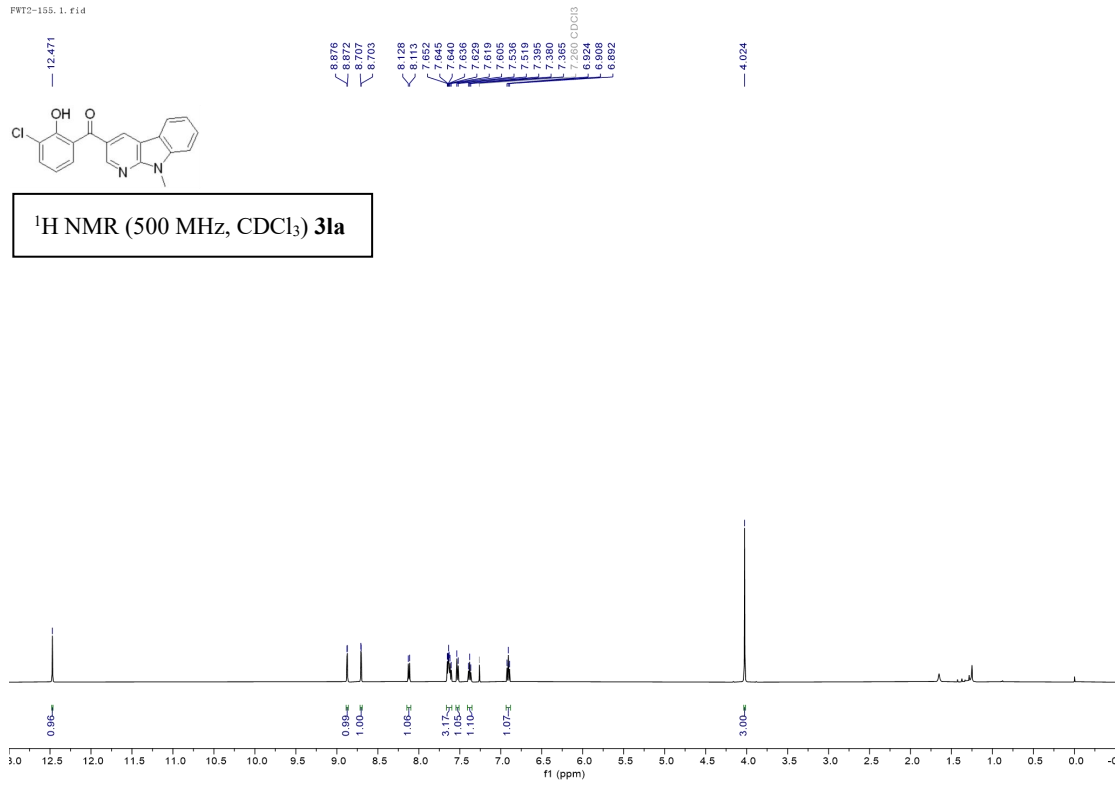

FT2-155.2.fid

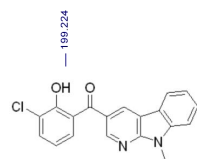

$^{13}\text{C}$  NMR (125 MHz,  $\text{CDCl}_3$ ) **3la**

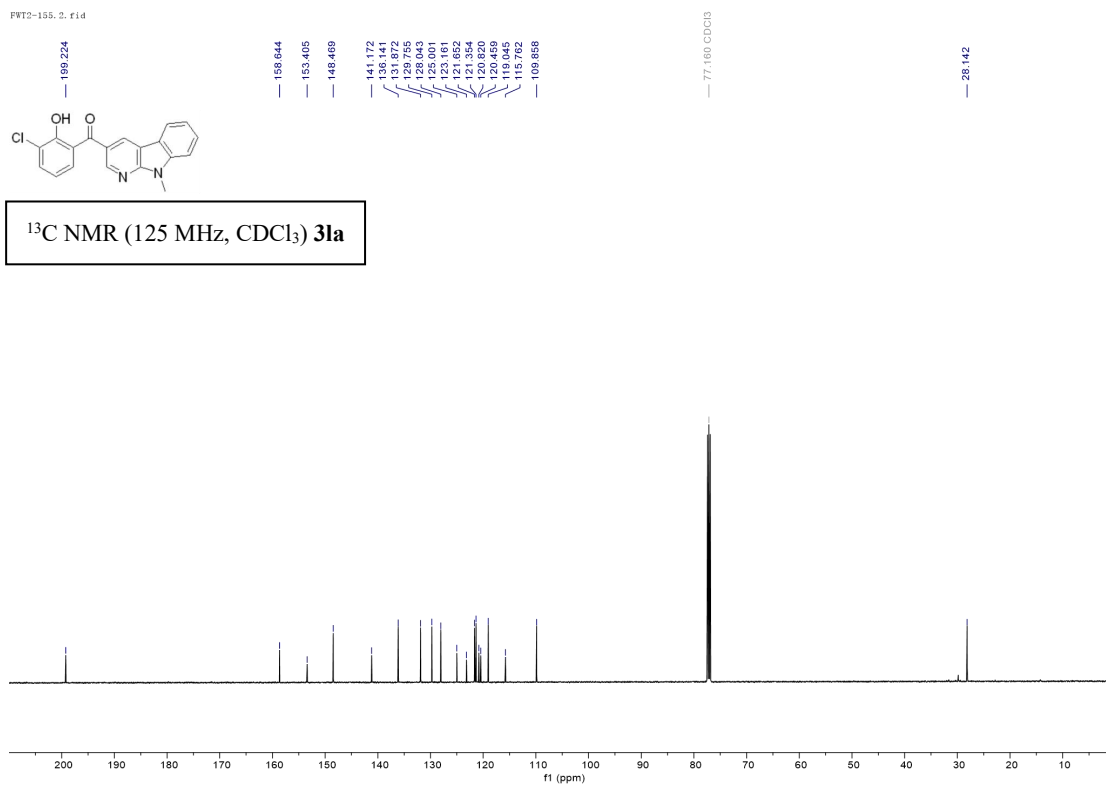

FT2-156-4.1.fid

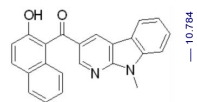

$^1\text{H}$  NMR (500 MHz,  $\text{CDCl}_3$ ) **3ma**

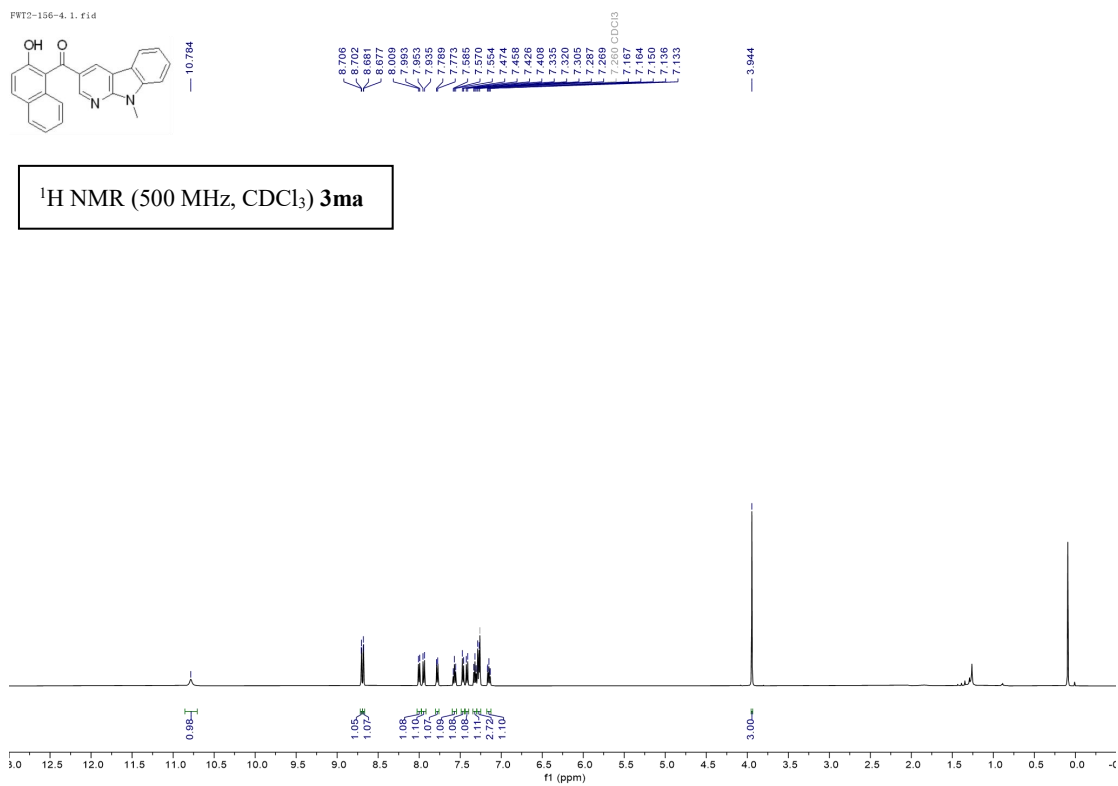

FT2-156-4. 2. f1d

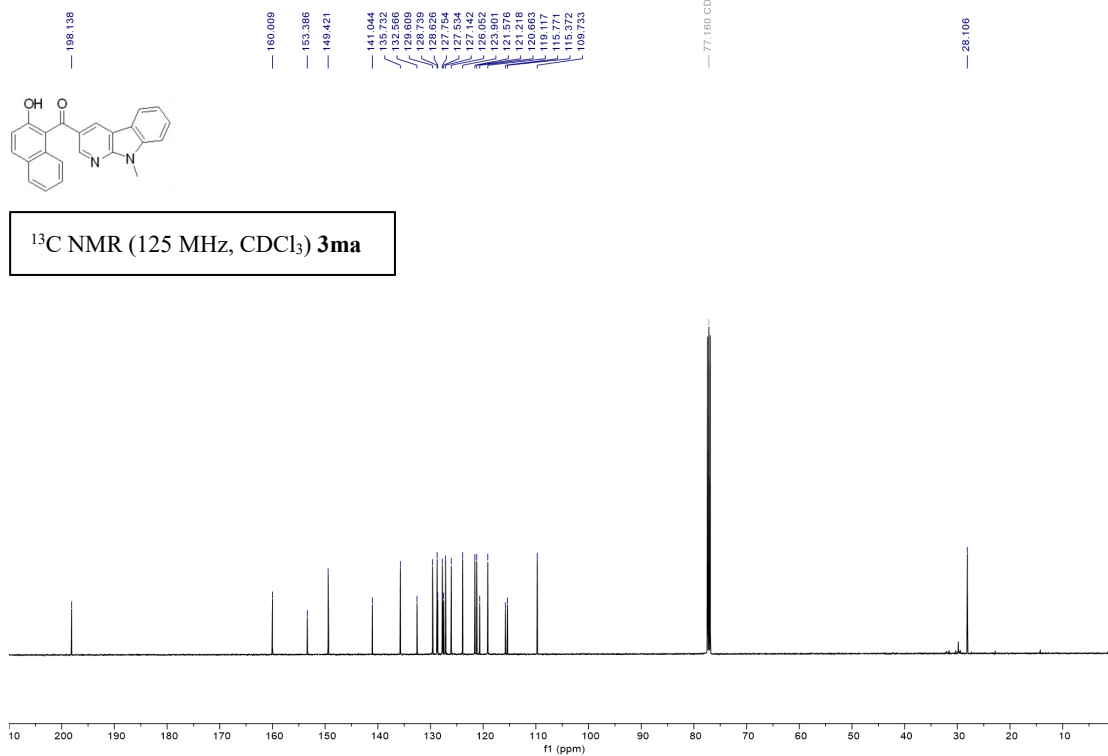

FT2-2-157. 1. f1d

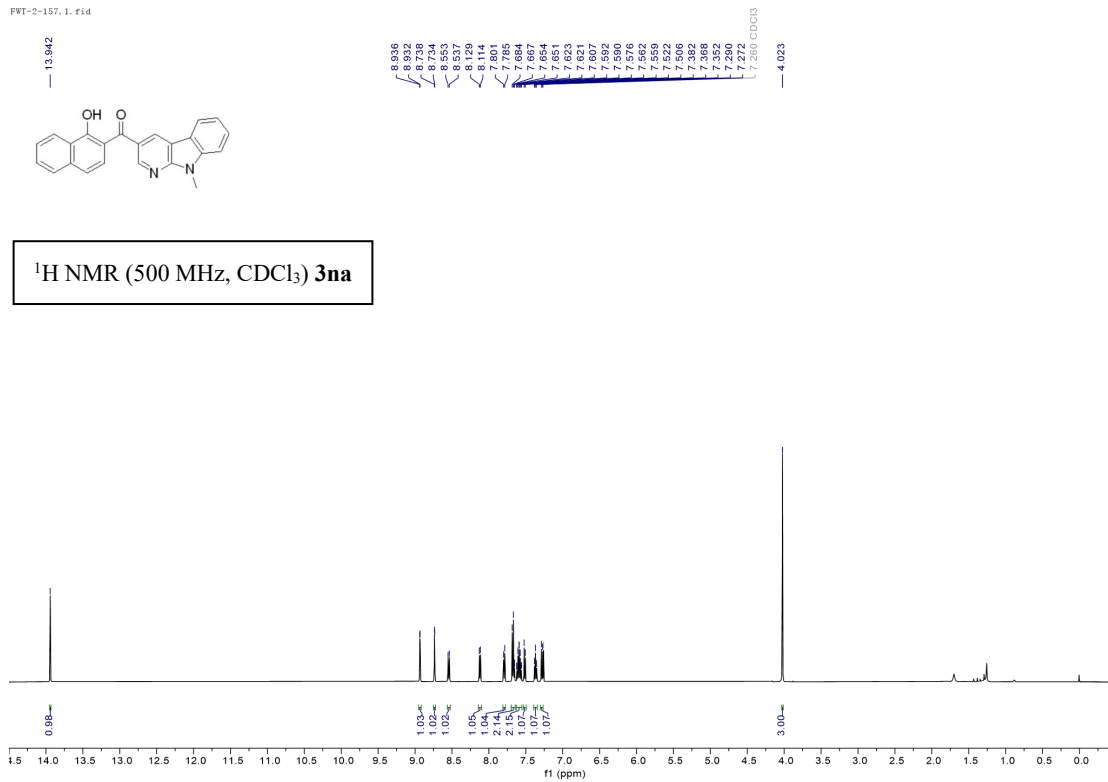





FWT2-65-2.2.1.r1d

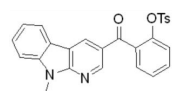

$^{13}\text{C}$  NMR (125 MHz,  $\text{CDCl}_3$ ) **5aa**

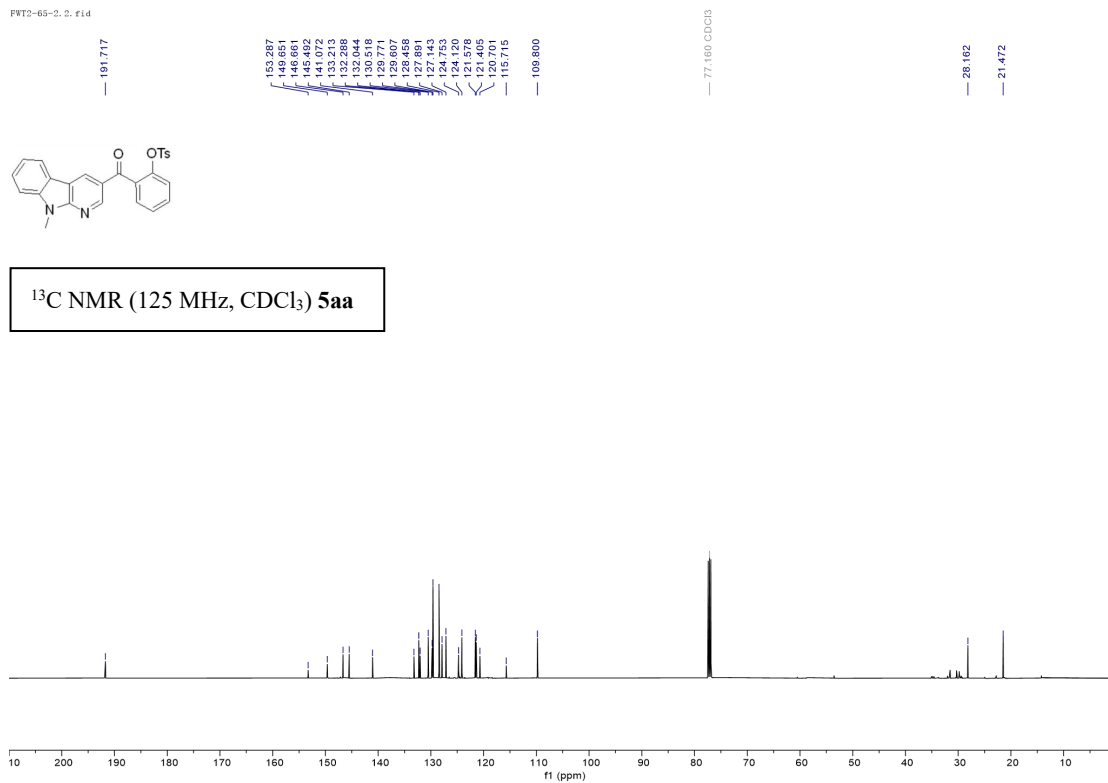

FWT2-126-2.1.r1d

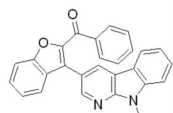

$^1\text{H}$  NMR (500 MHz,  $\text{CDCl}_3$ ) **6**

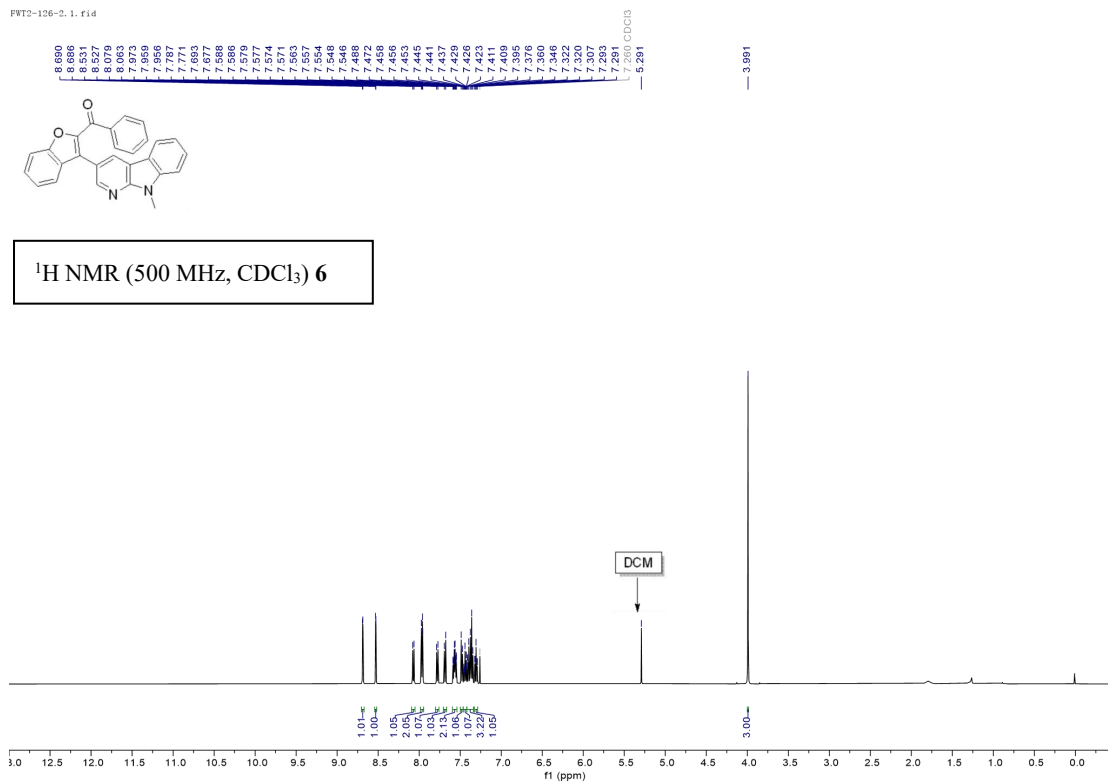

FT2-126-2.2.rid

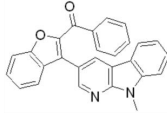

**<sup>13</sup>C NMR (125 MHz, CDCl<sub>3</sub>) 6**

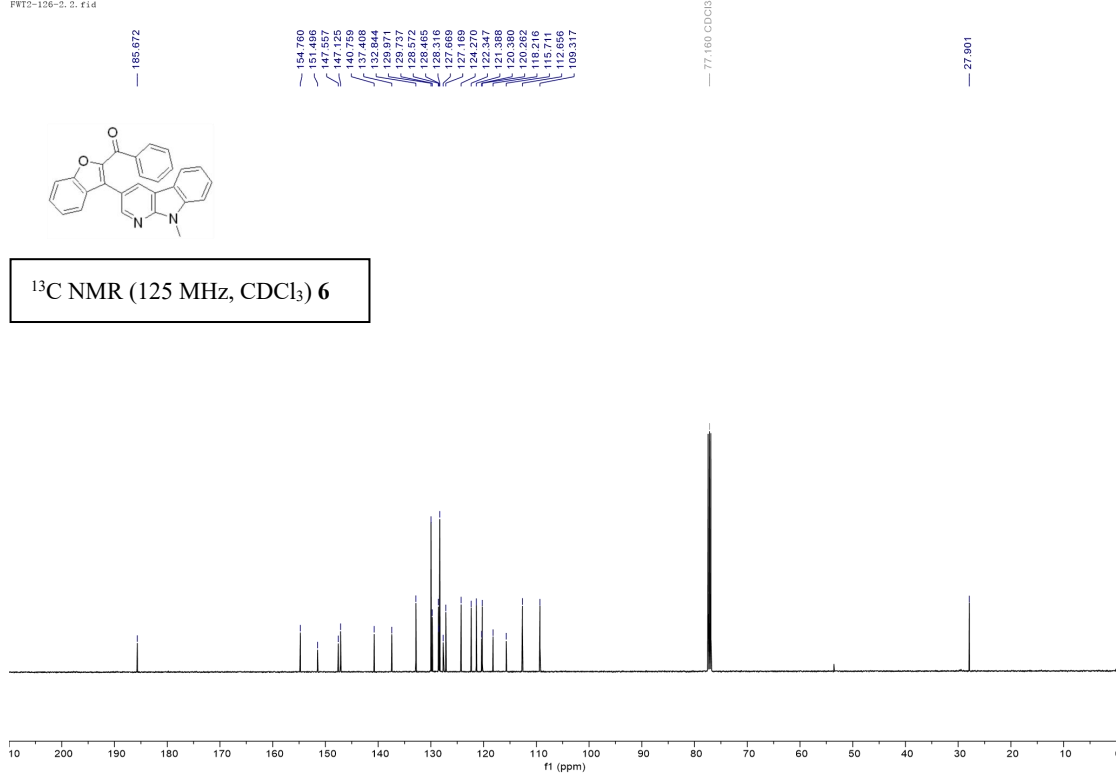

FT2-145-2.1.rid

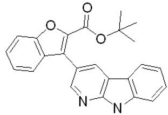

**<sup>1</sup>H NMR (500 MHz, CDCl<sub>3</sub>) 7**

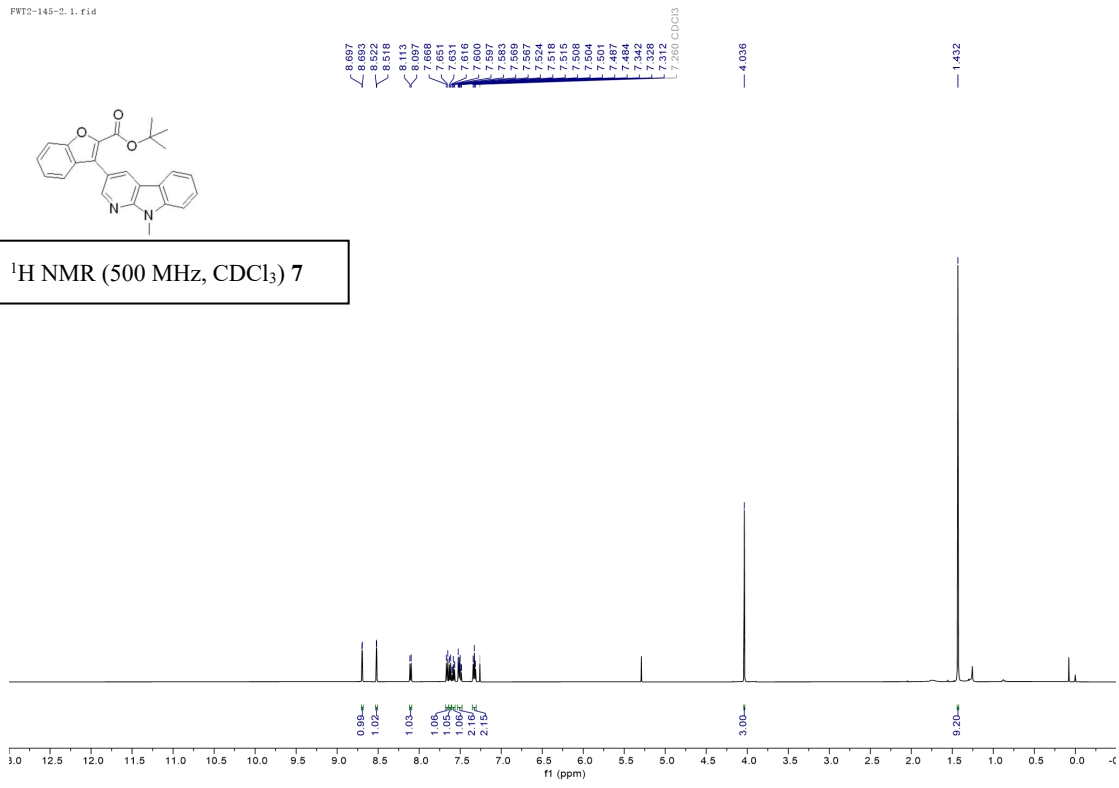

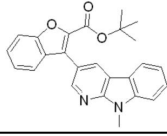

**<sup>13</sup>C NMR (125 MHz, CDCl<sub>3</sub>) 7**

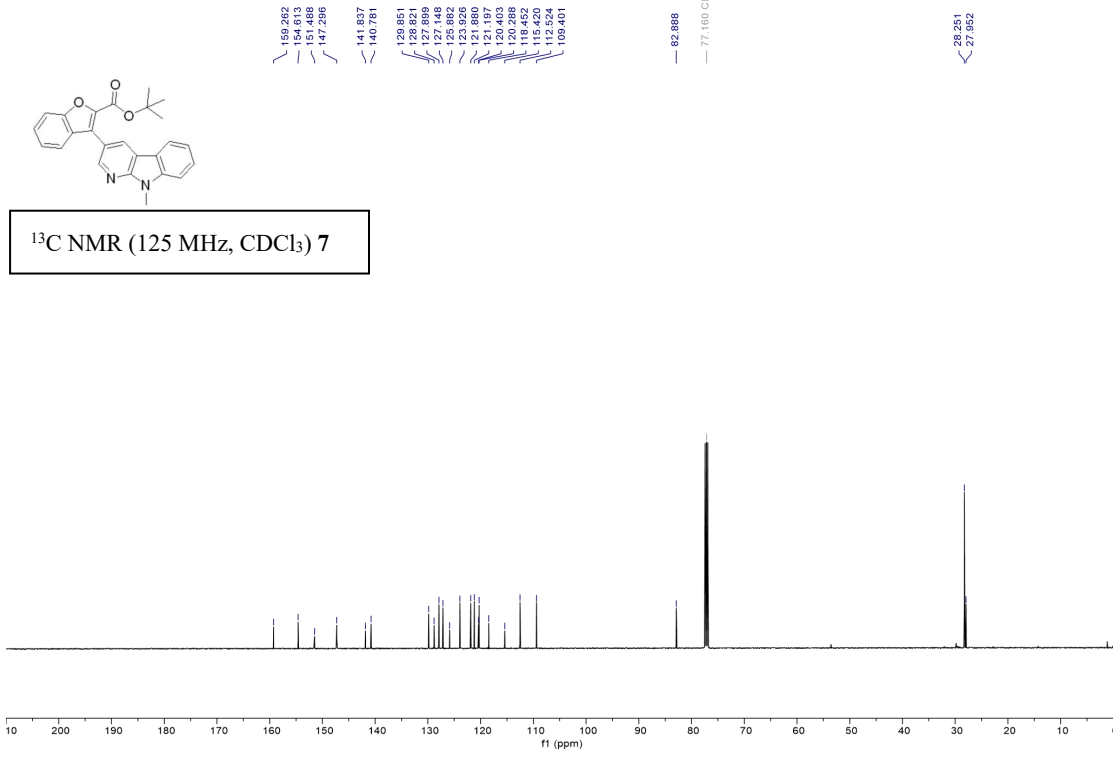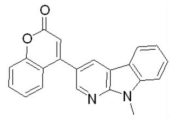

**<sup>1</sup>H NMR (500 MHz, CDCl<sub>3</sub>) 8**

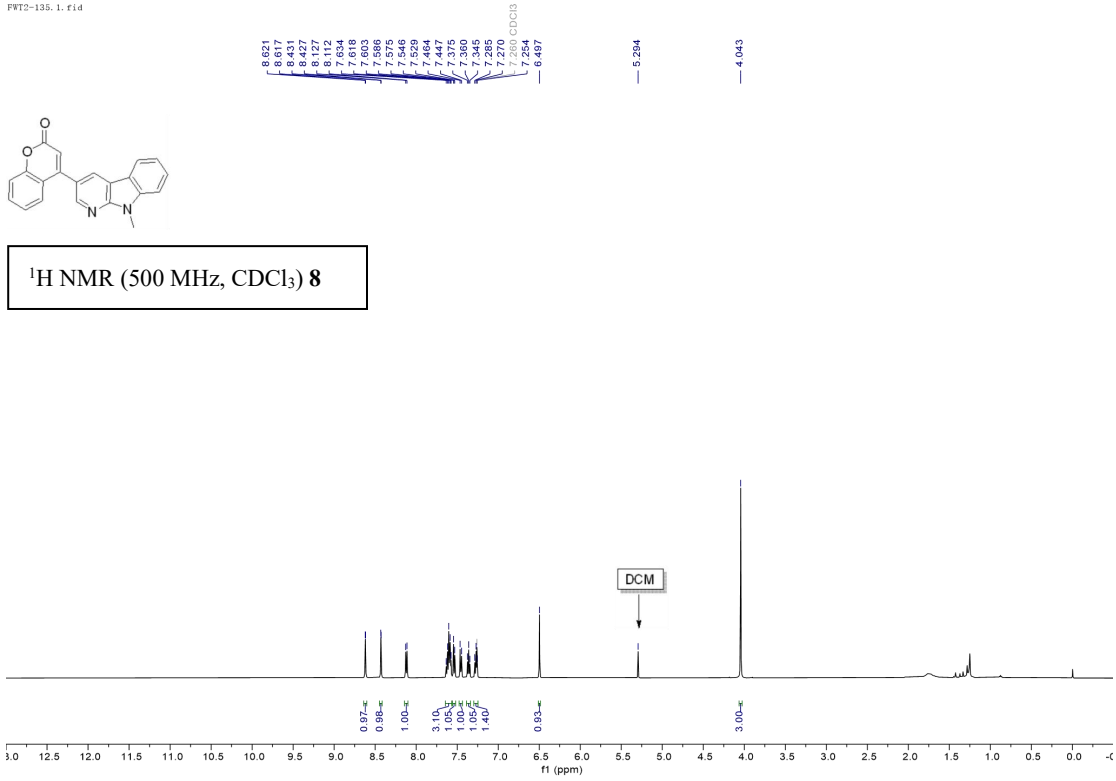

FT2-135.2.fid

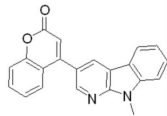

**<sup>13</sup>C NMR (125 MHz, CDCl<sub>3</sub>) 8**

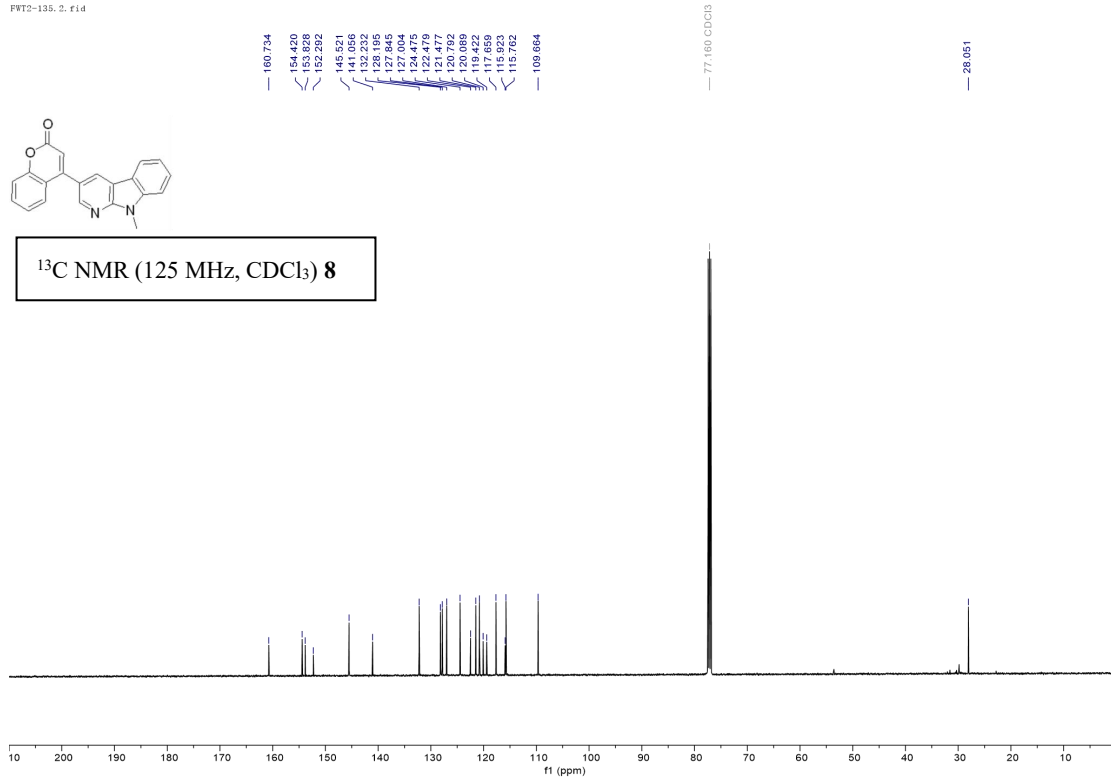

FT2-139.1.fid

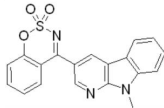

**<sup>1</sup>H NMR (500 MHz, CDCl<sub>3</sub>) 9**

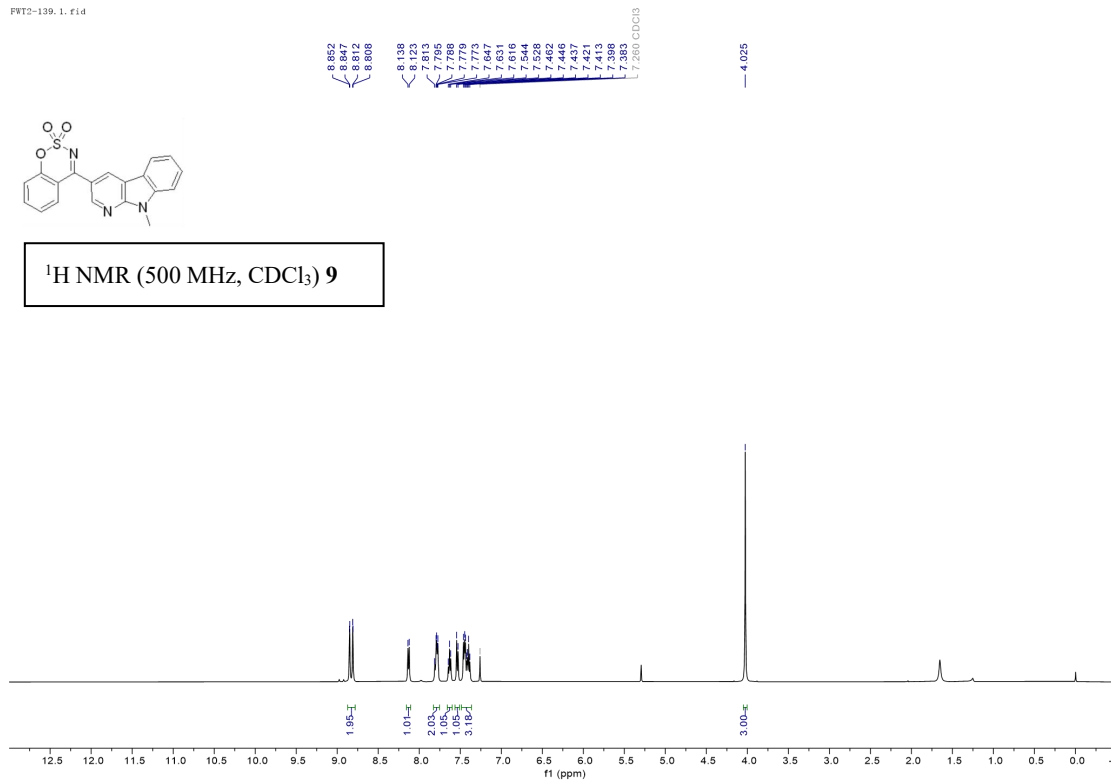

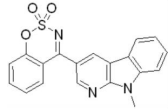

<sup>13</sup>C NMR (125 MHz, CDCl<sub>3</sub>) **9**

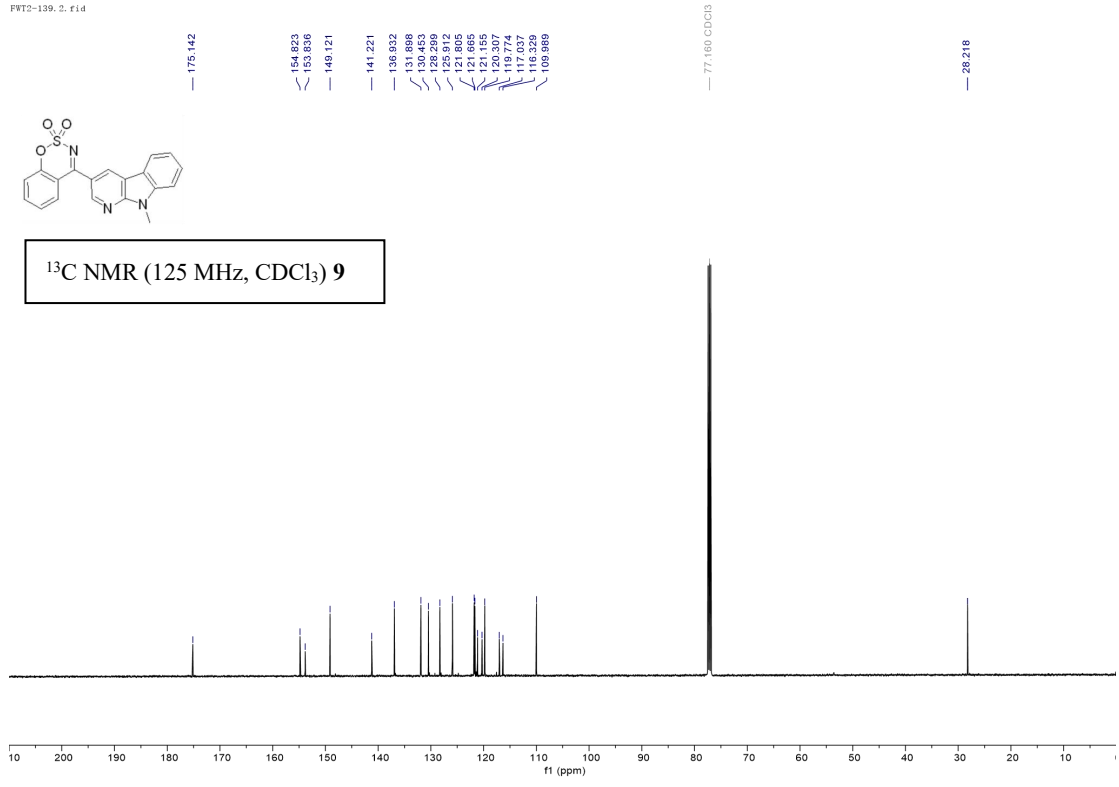

## 6. HRMS Spectra

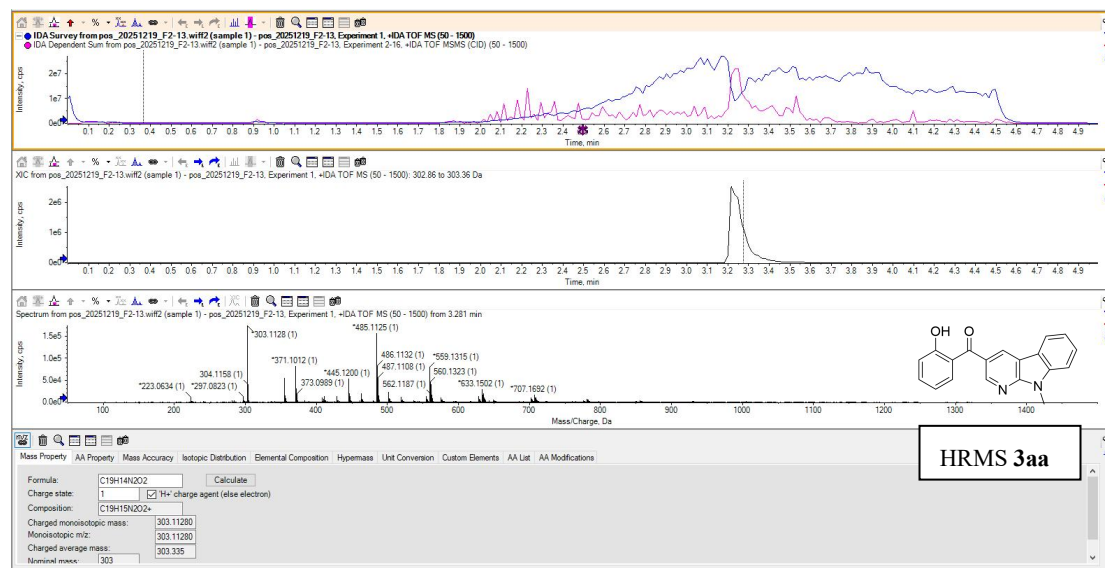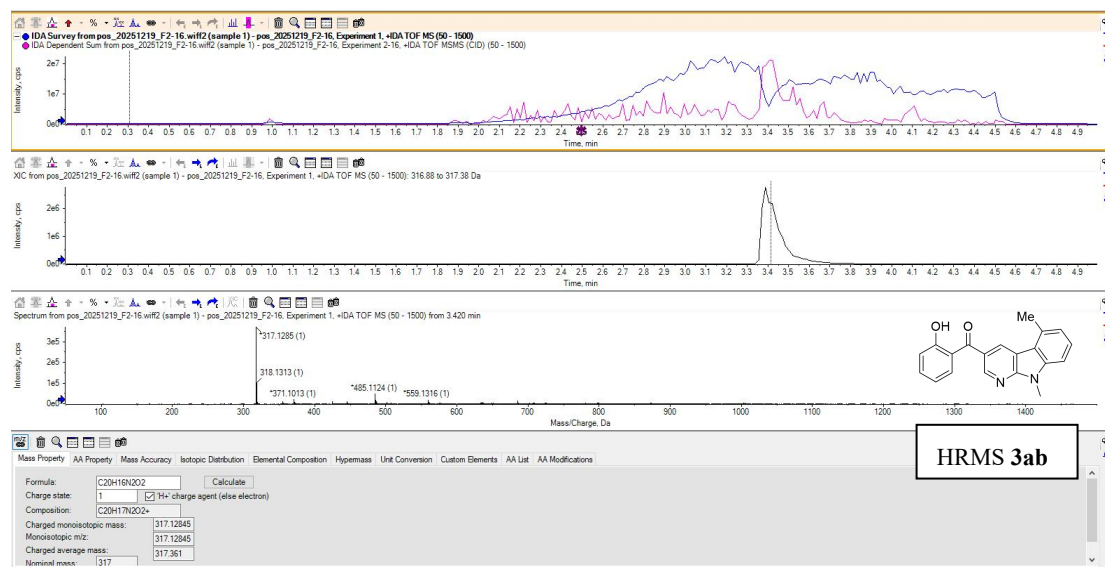

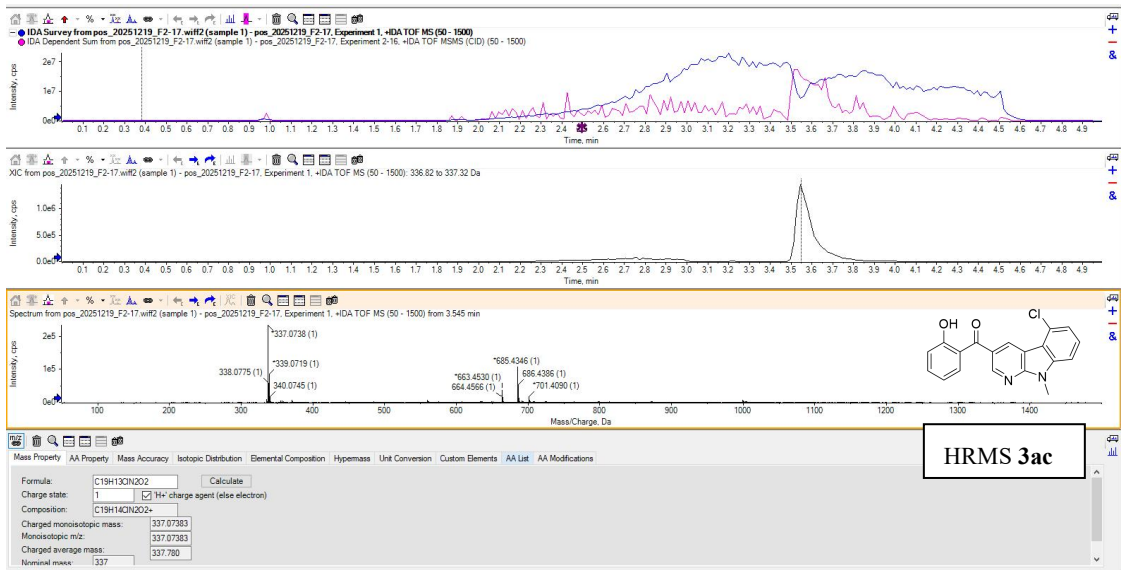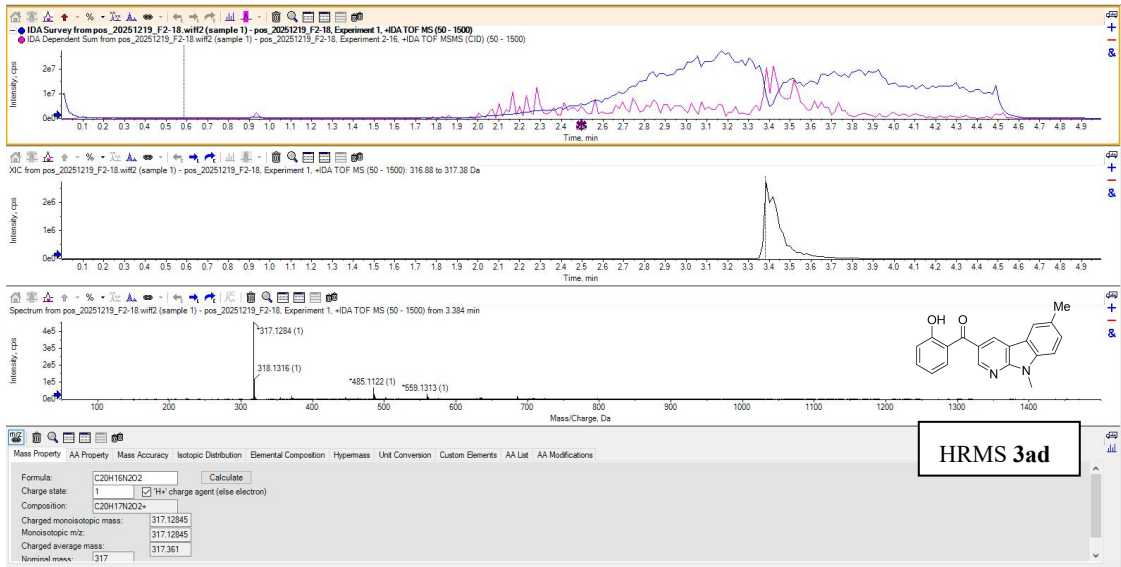

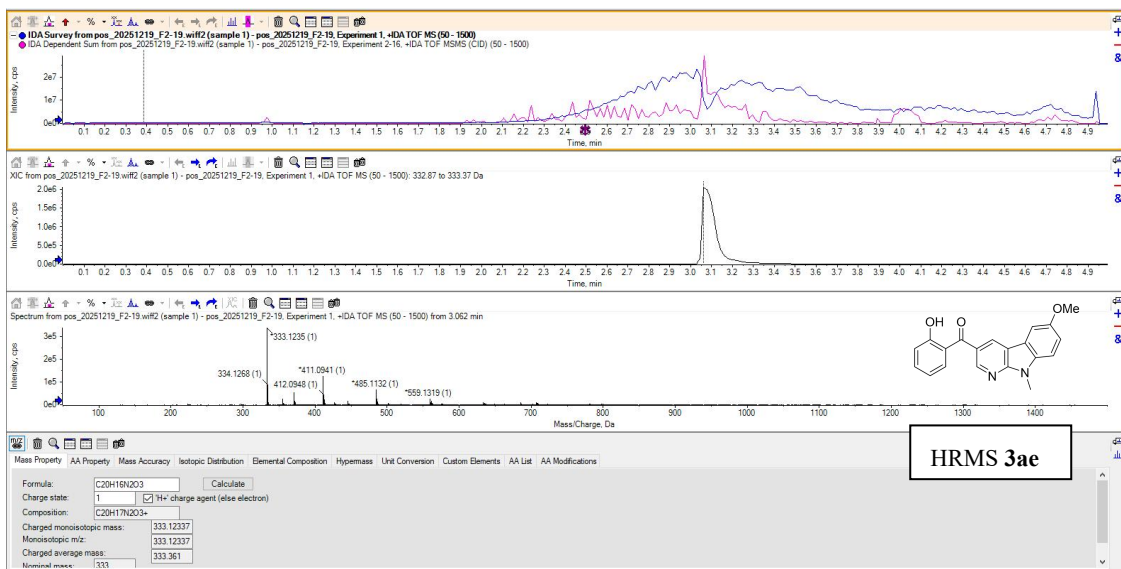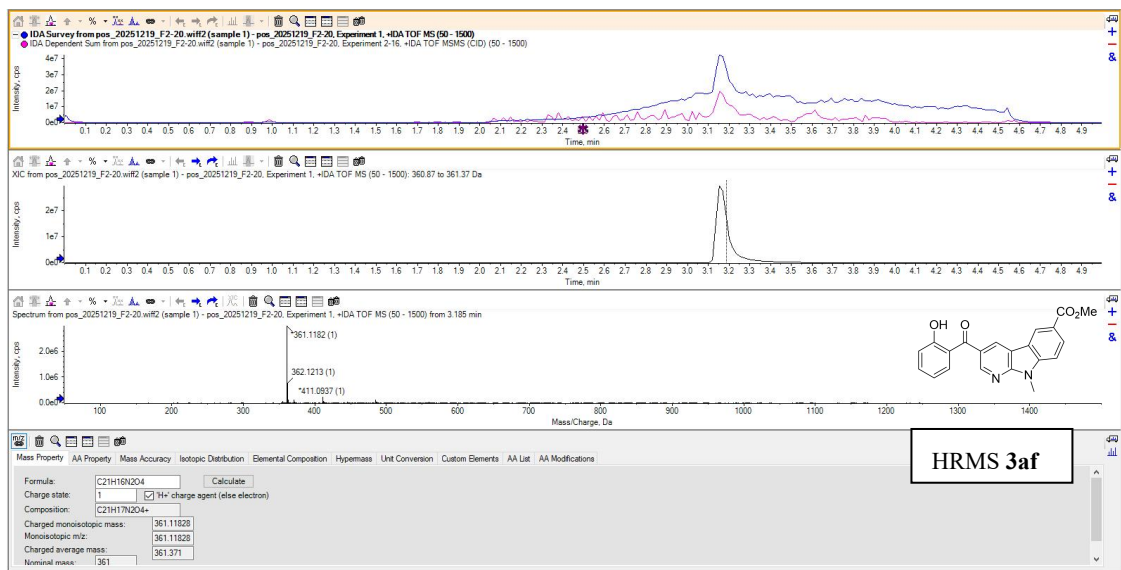

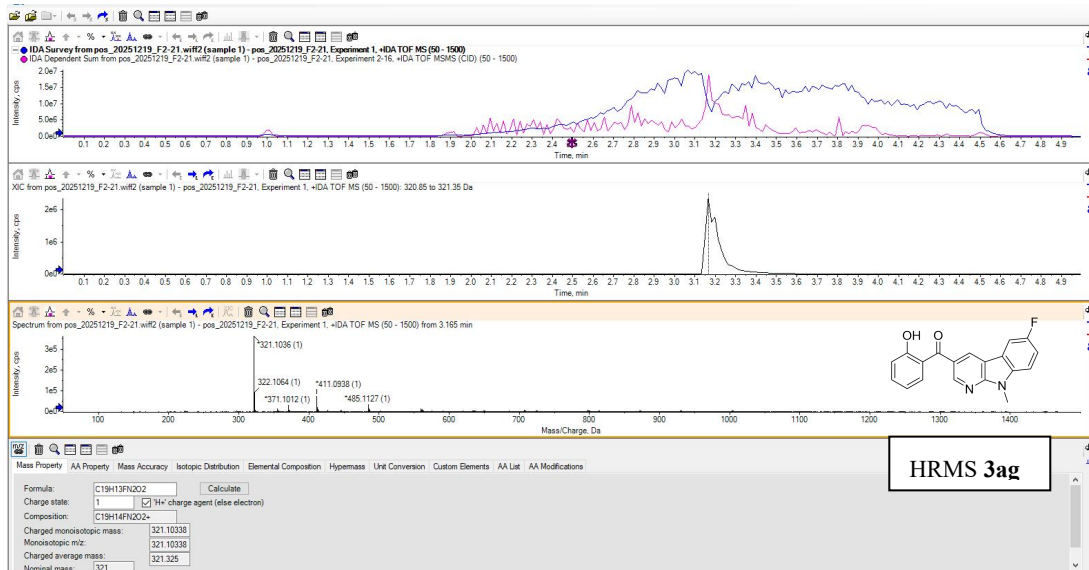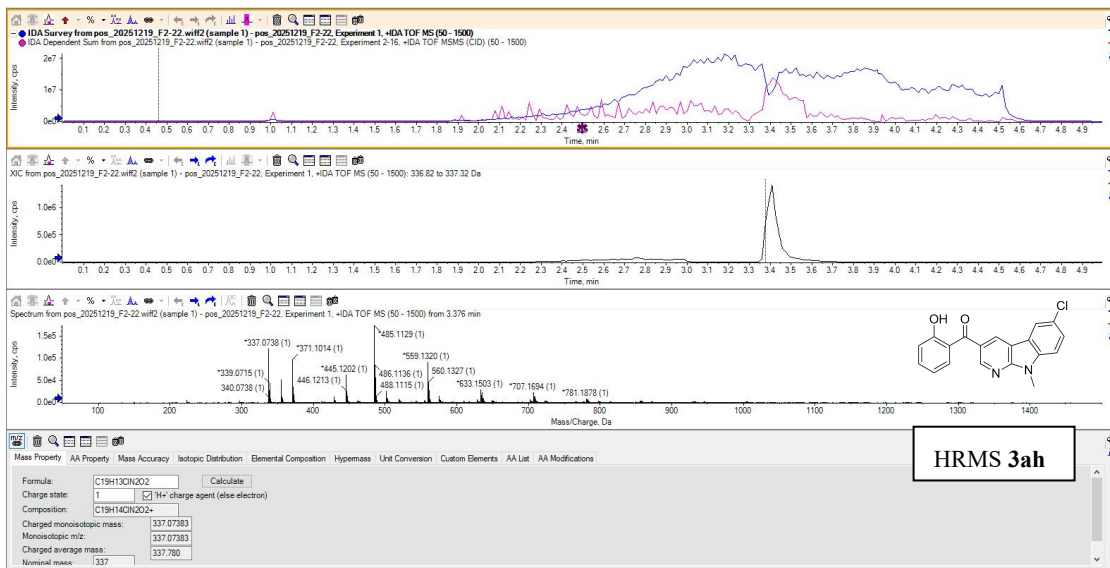

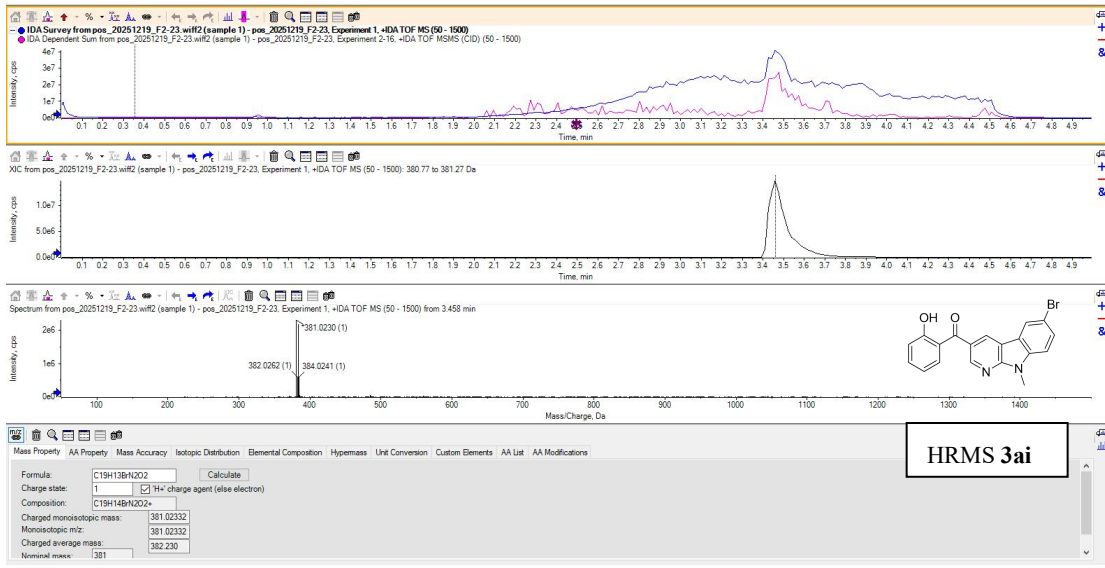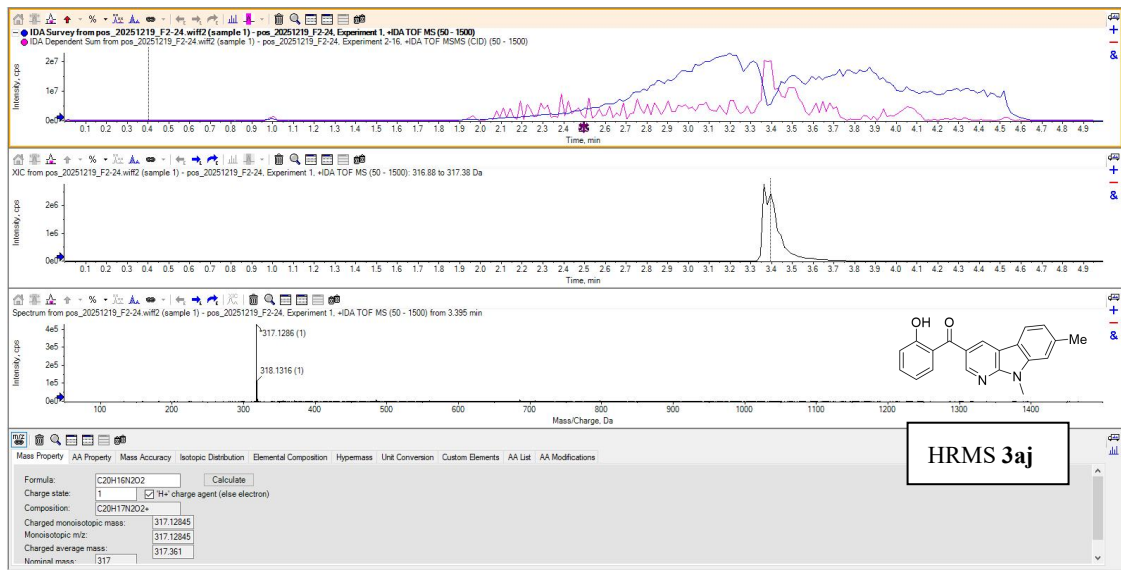

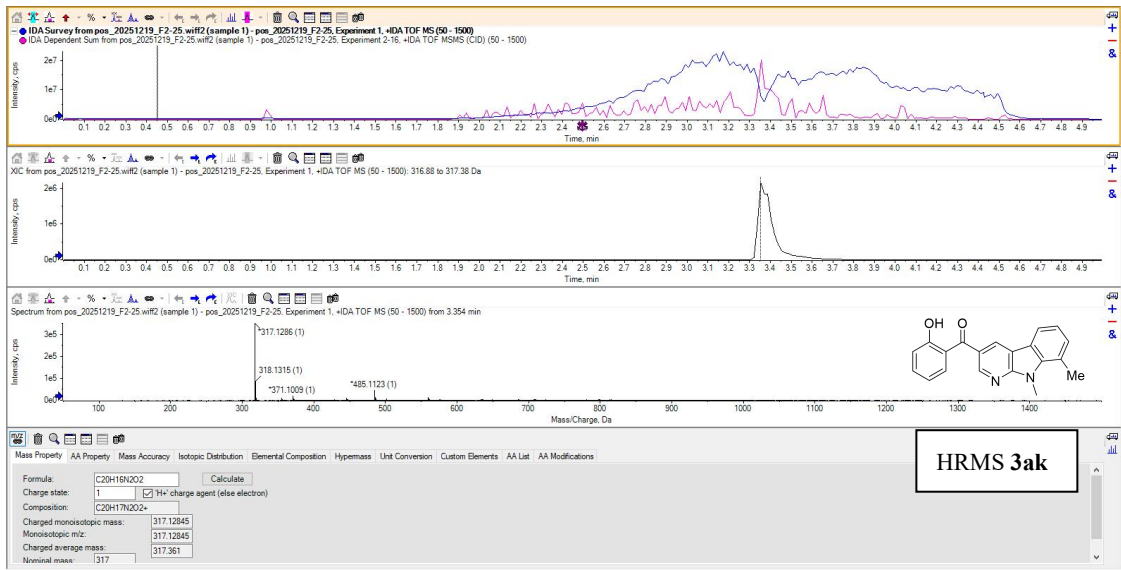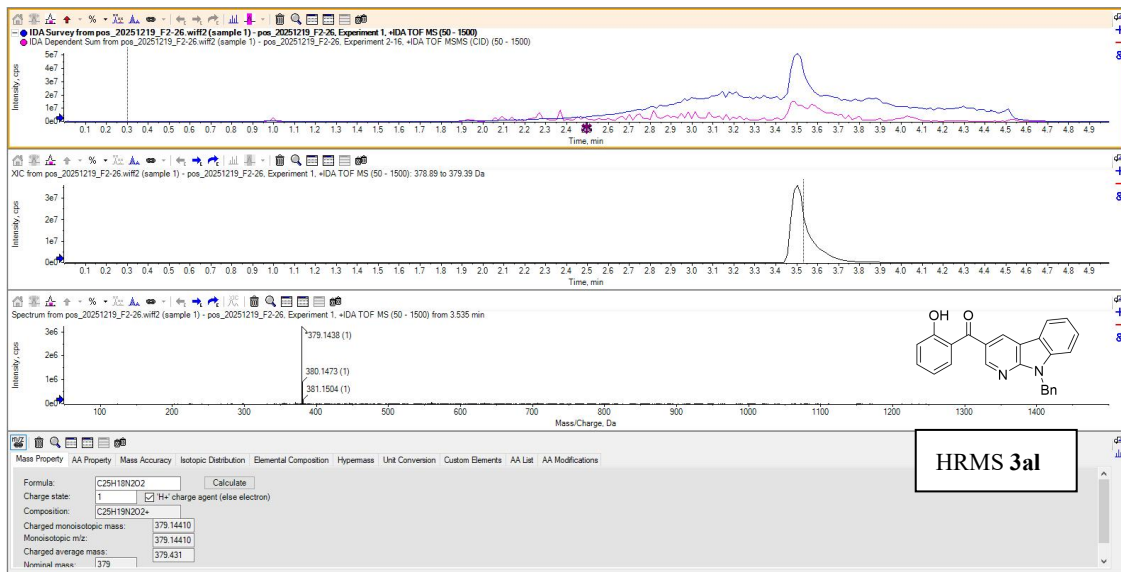

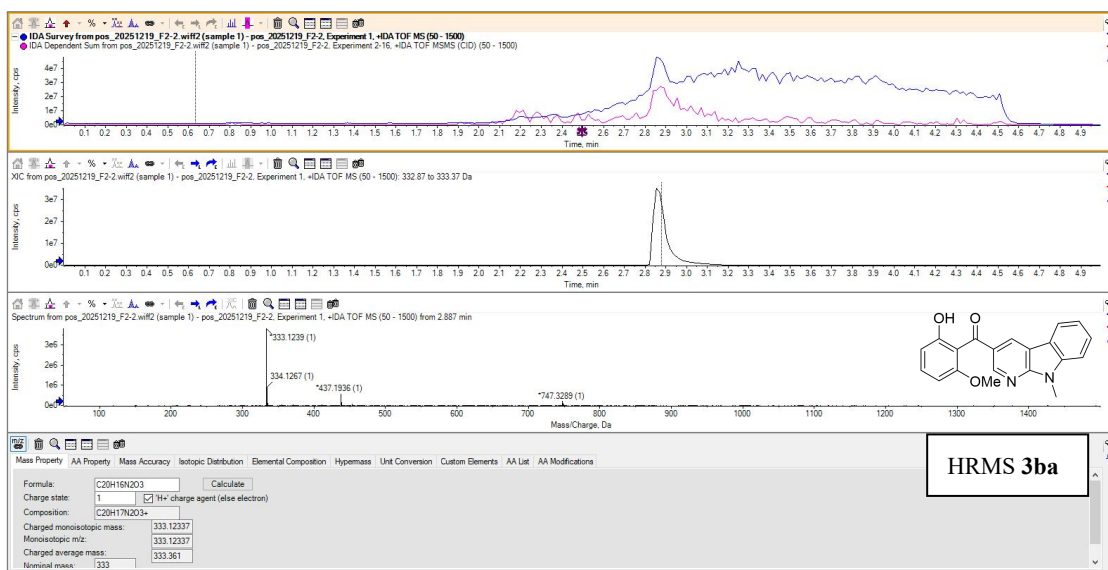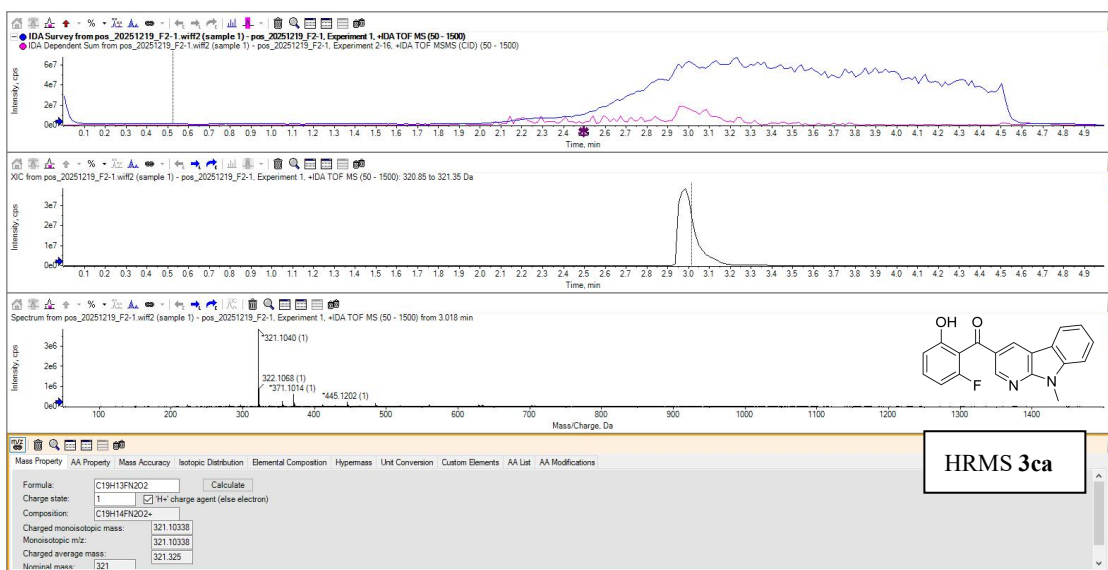

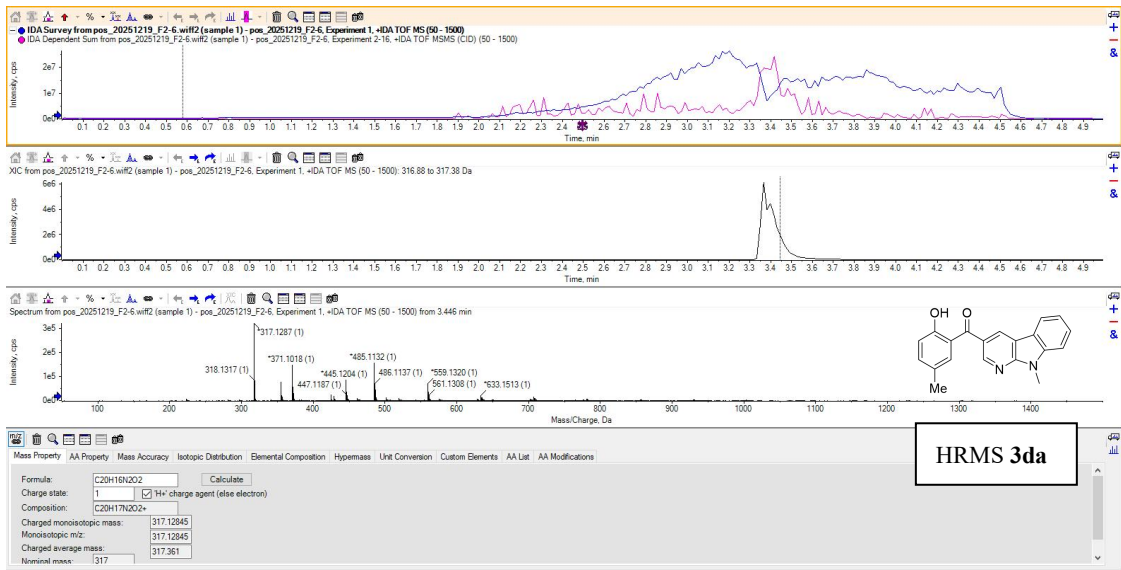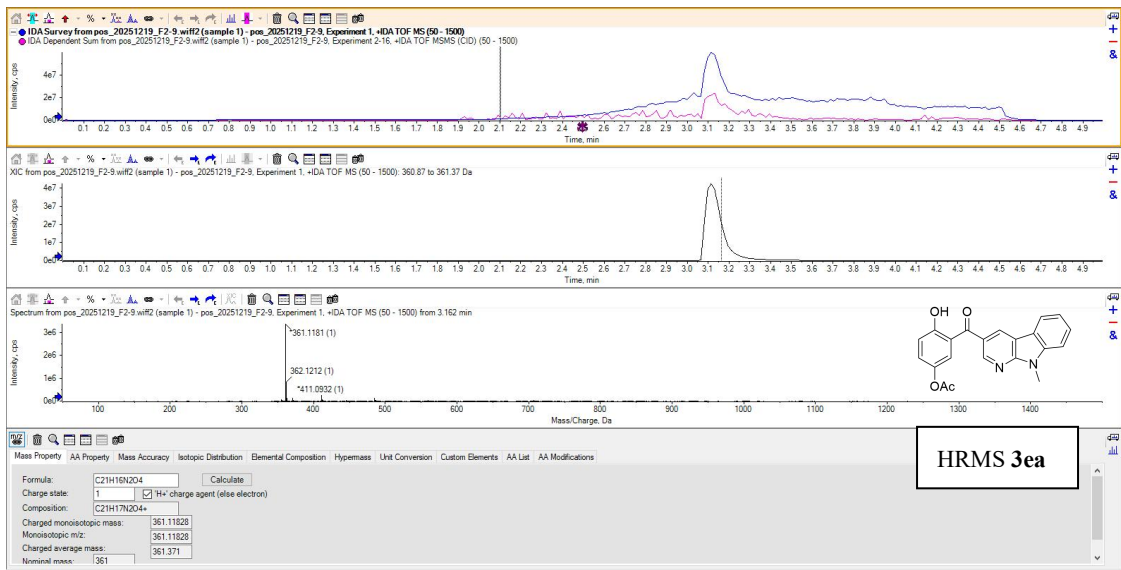

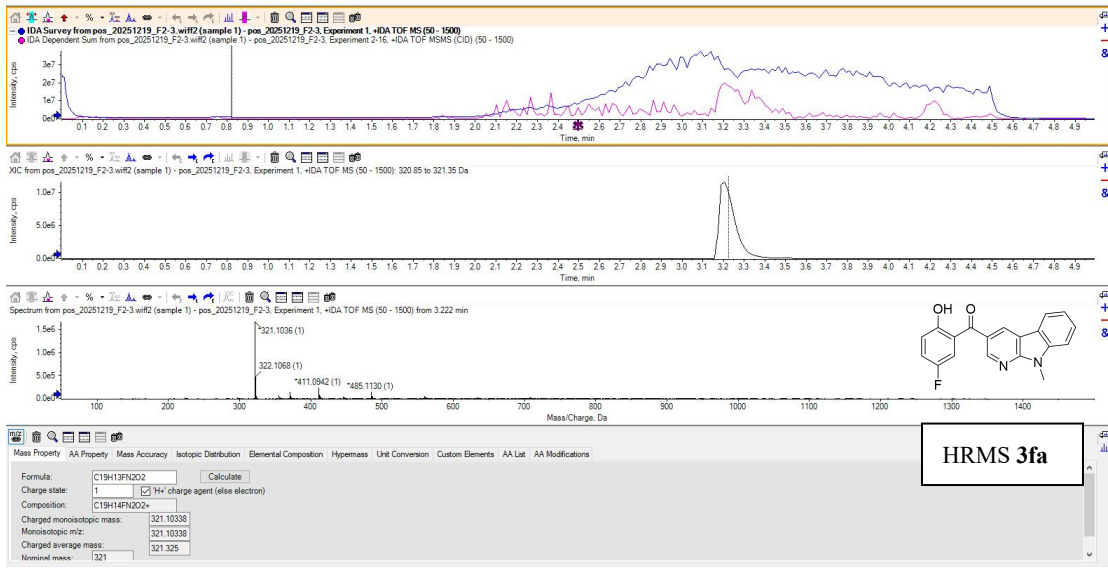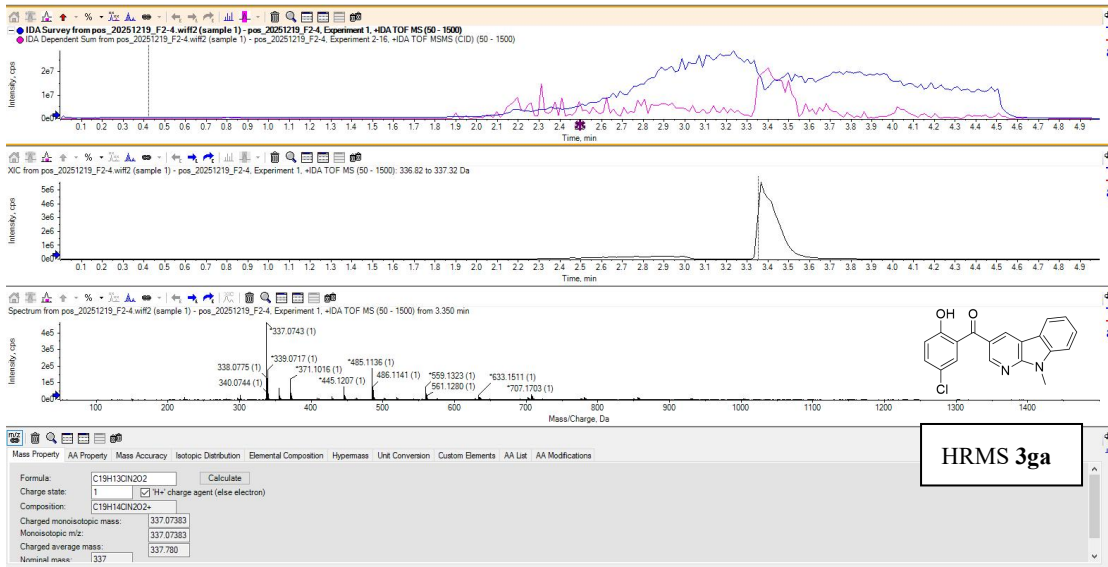

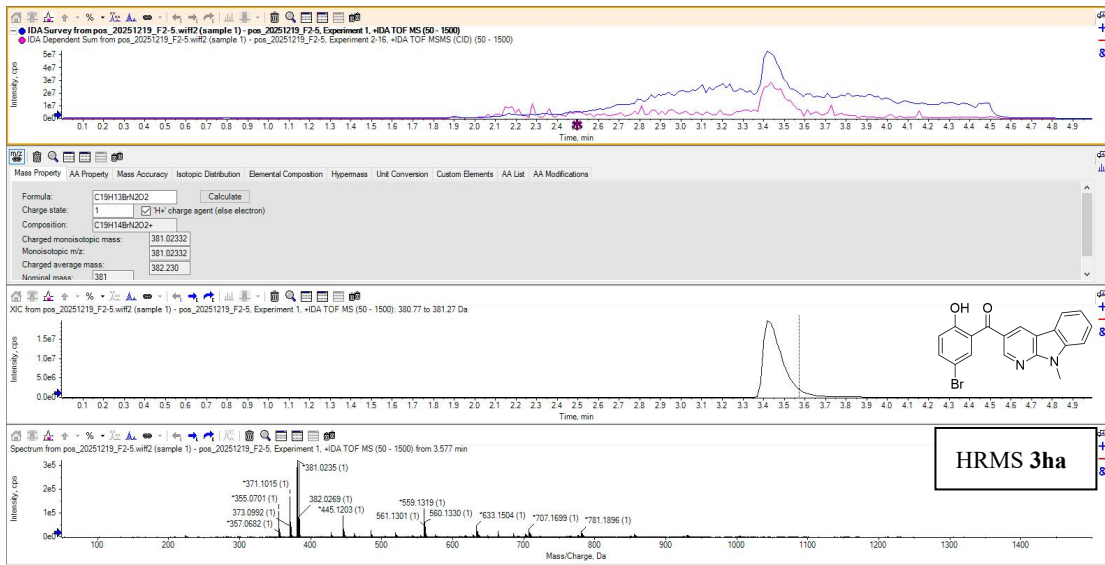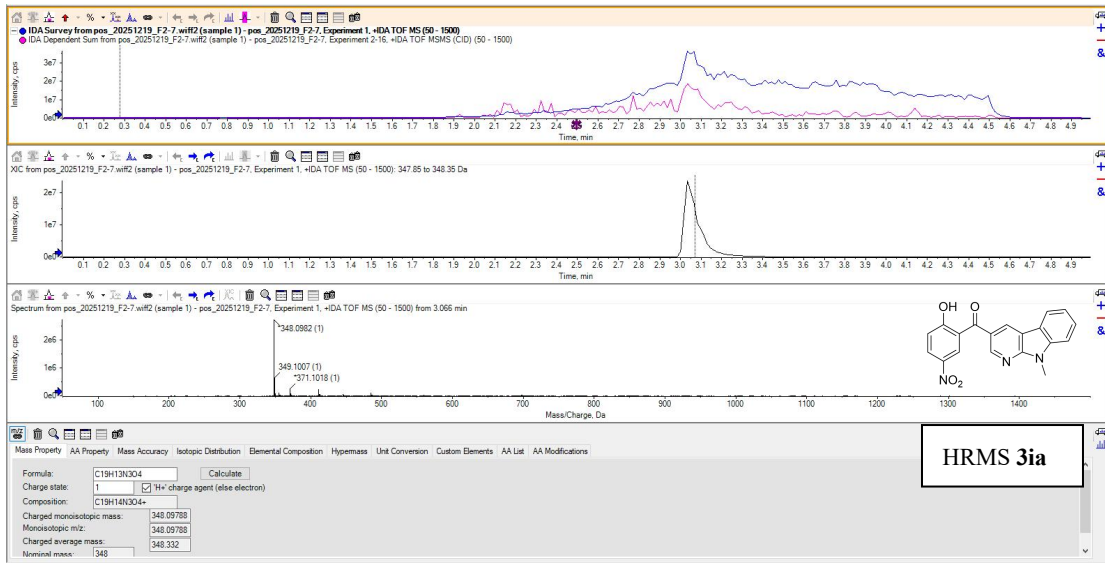

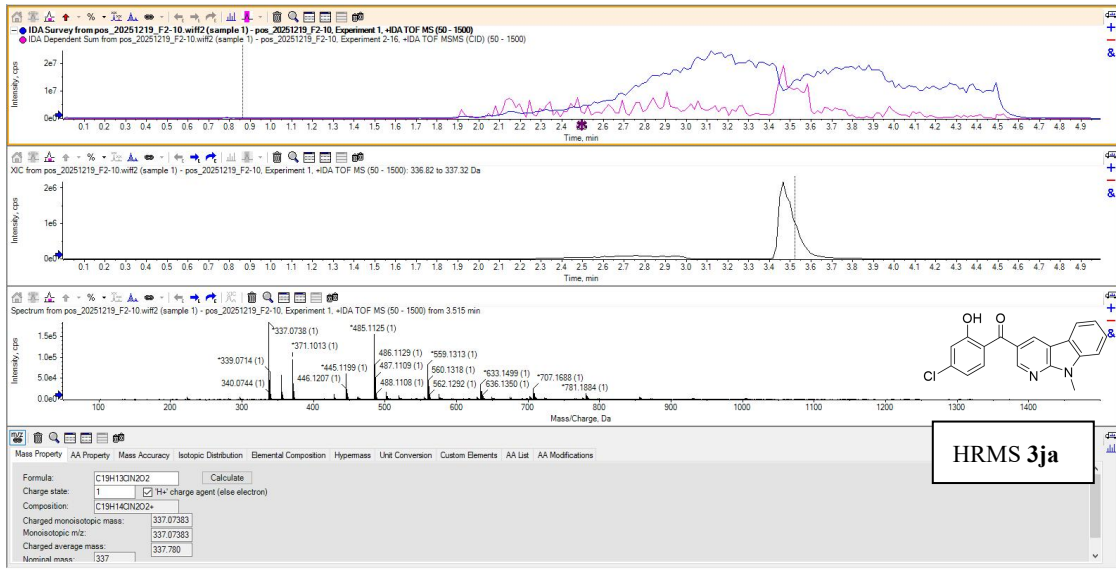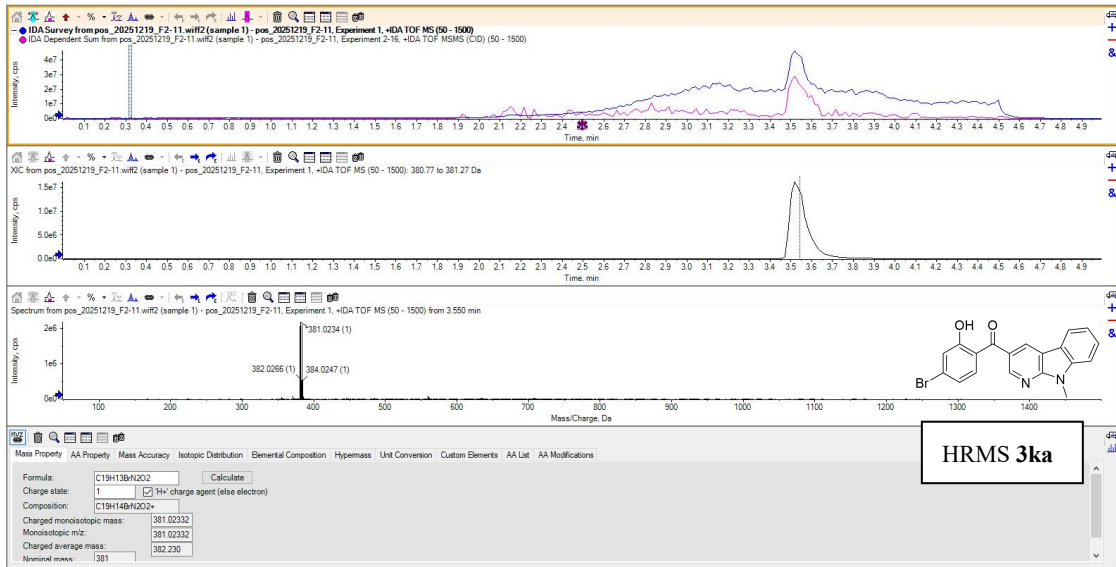

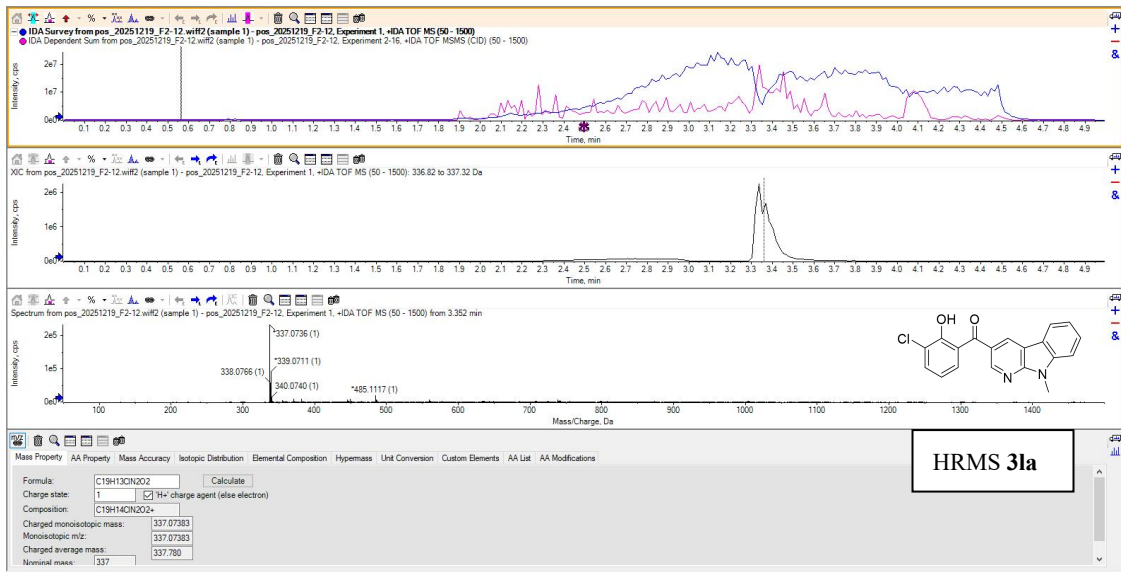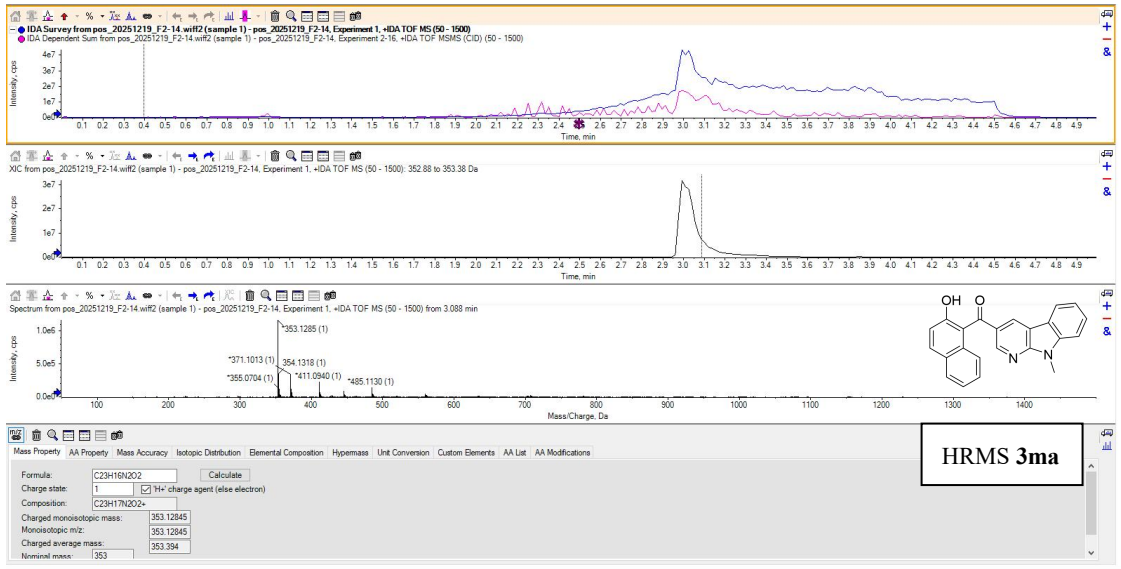

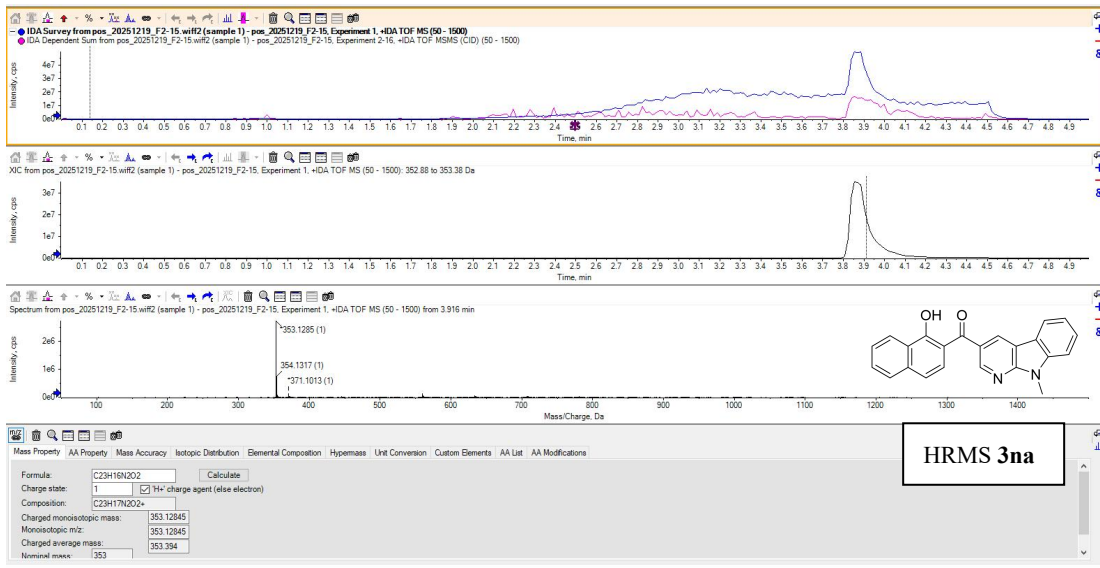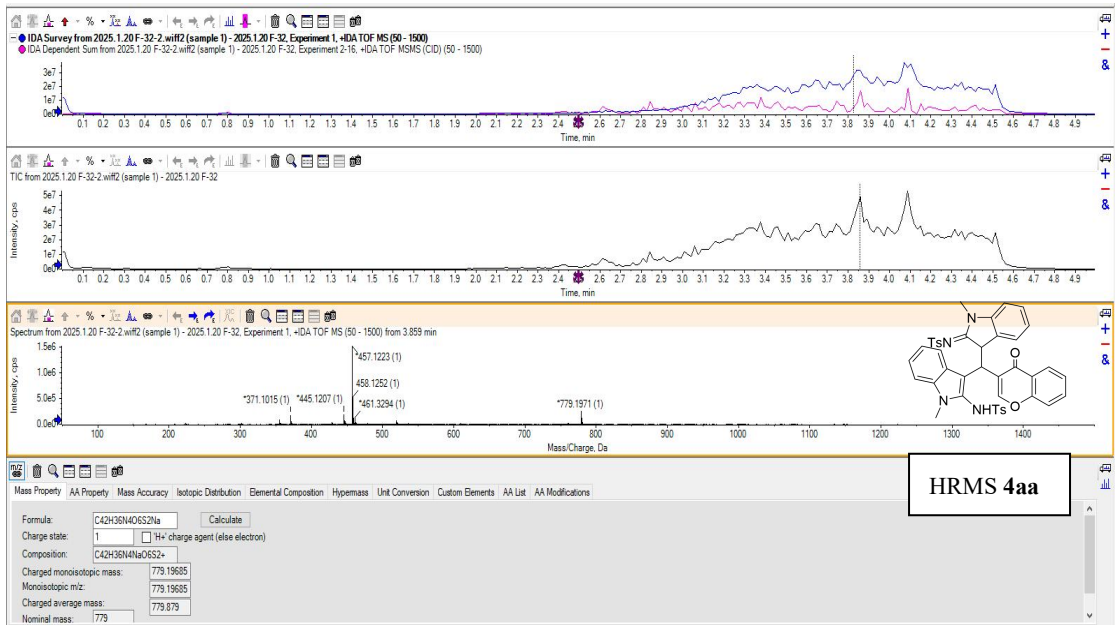

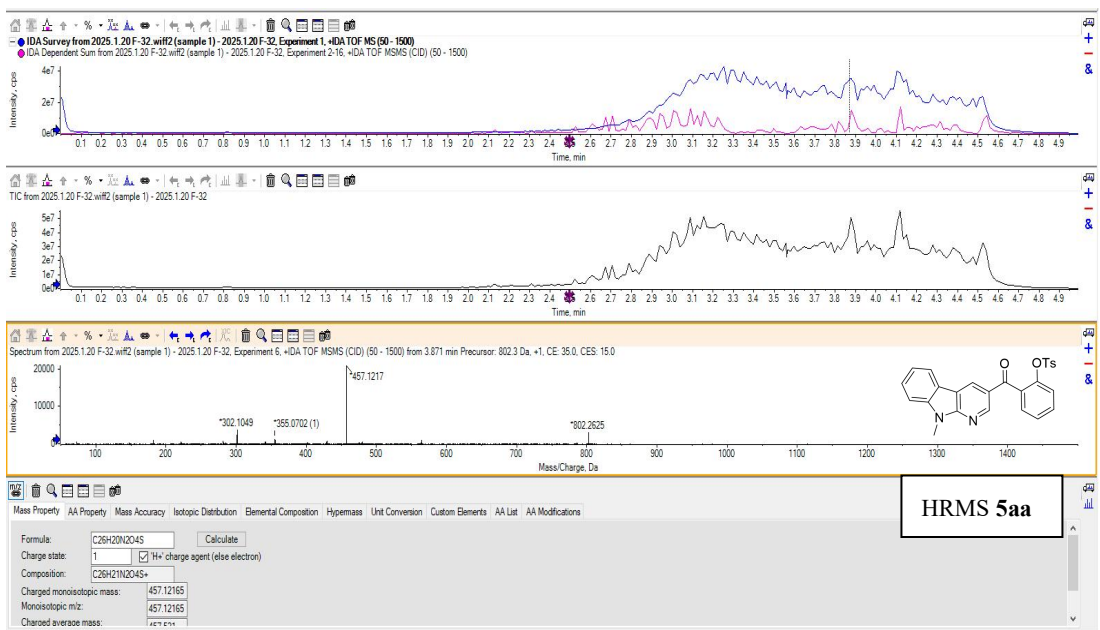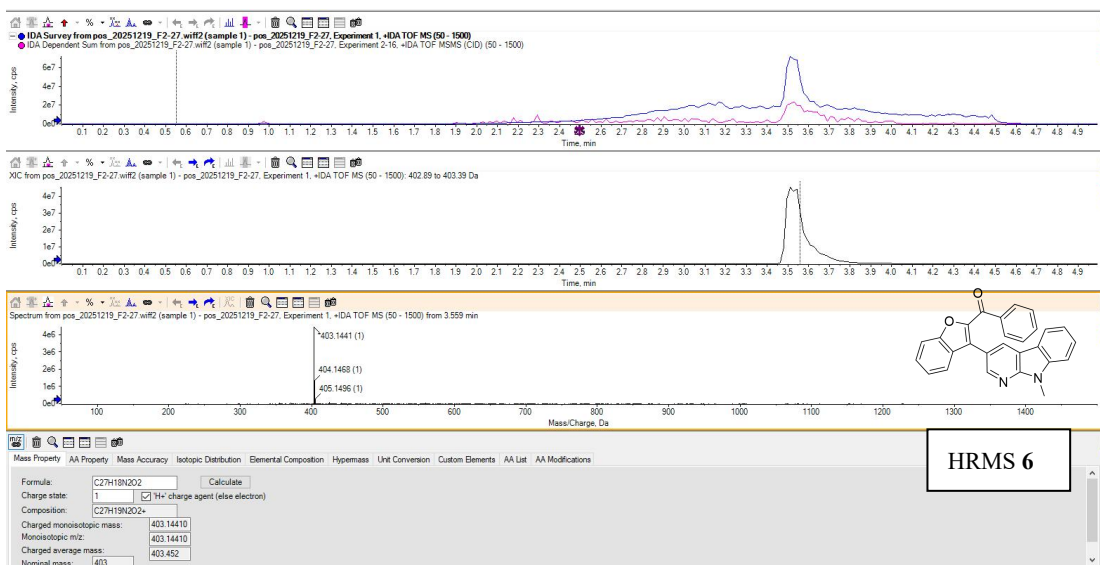

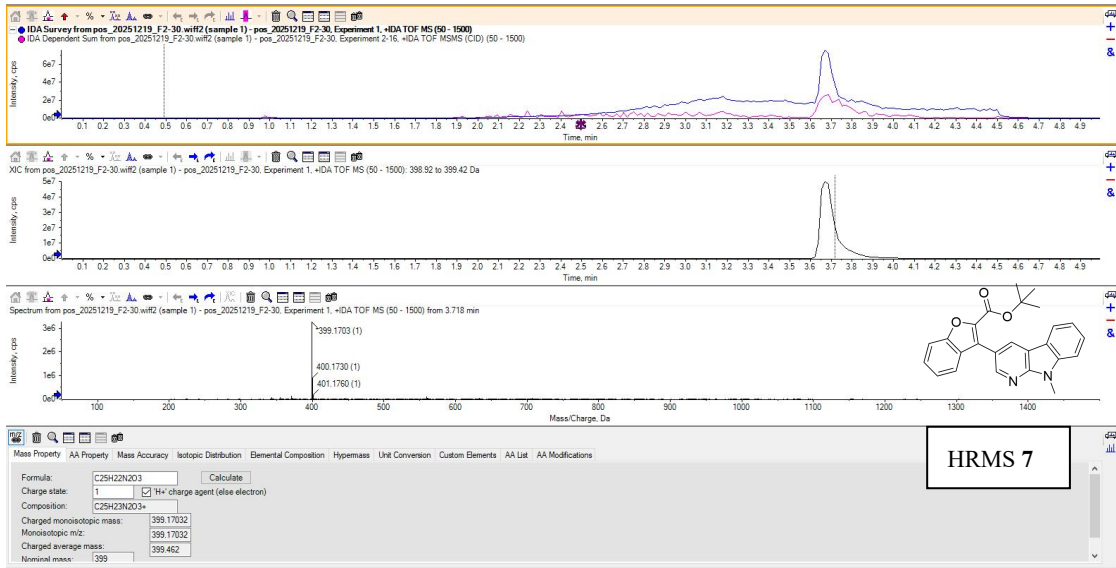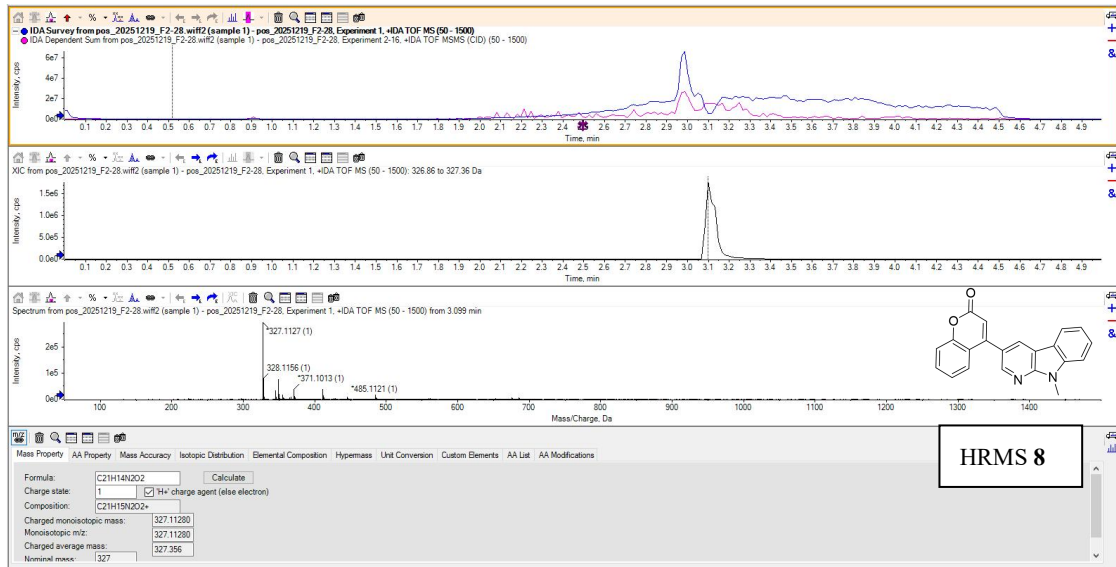

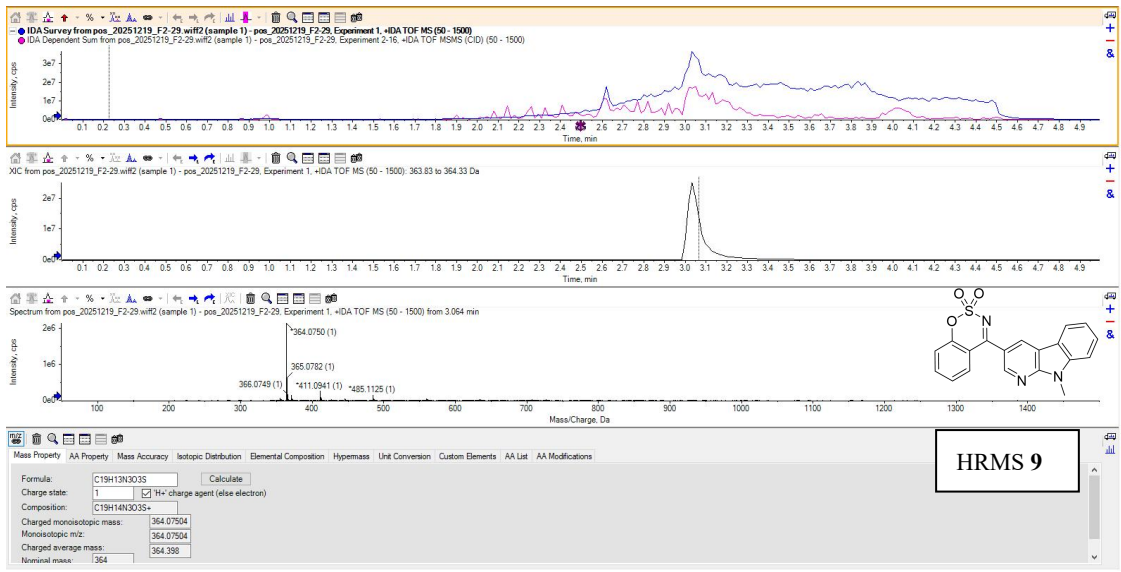

## 7. X-ray Crystal Structure Information

### 7.1 X-ray Crystal Structure Information of Compound 3ka

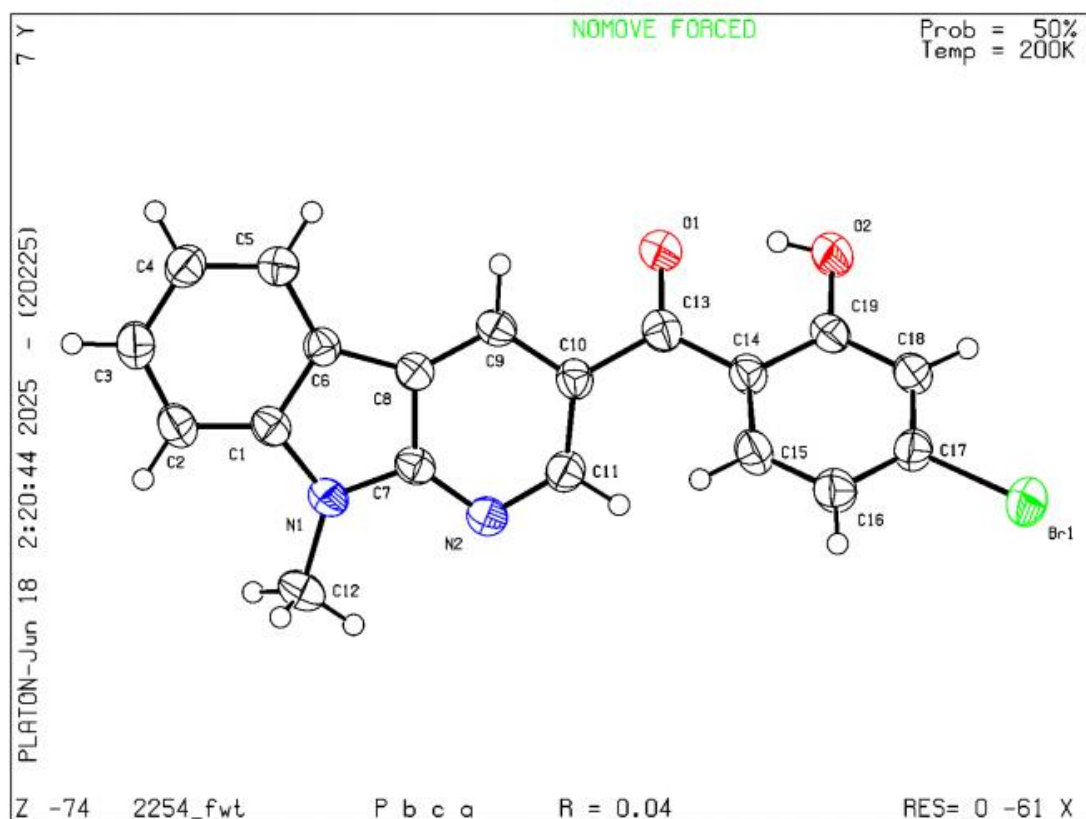

#### 3ka

**Sample preparation:** A small amount of sample **3ka** was dissolved in DCM in a vial, and then petroleum ether was dripped into the solution. Then the vial was sealed with a thin layer of parafilm and some holes were made on top of parafilm. The solvent volatilized slowly at room temperature to afford the single crystal of **3ka**.

#### Experimental Section

Single crystals of  $C_{19}H_{13}BrN_2O_2$  [**3ka**] were []. A suitable crystal was selected and [] on a Bruker APEX-II CCD diffractometer. The crystal was kept at 200.0 K during data collection. Using Olex2 [1], the structure was solved with the SHELXT [2] structure solution program using Intrinsic Phasing and refined with the SHELXL [3] refinement package using Least Squares minimisation.

1. Dolomanov, O.V., Bourhis, L.J., Gildea, R.J, Howard, J.A.K. & Puschmann, H. (2009), *J. Appl. Cryst.* 42, 339-341.
2. Sheldrick, G.M. (2015). *Acta Cryst.* A71, 3-8.
3. Sheldrick, G.M. (2015). *Acta Cryst.* C71, 3-8.

Crystal structure determination of [**3ka**]

**Crystal Data** for  $C_{19}H_{13}BrN_2O_2$  ( $M = 381.22$  g/mol): orthorhombic, space group *Pbca* (no. 61),  $a = 12.3418(5)$  Å,  $b = 8.5375(4)$  Å,  $c = 29.6015(12)$  Å,  $V = 3119.1(2)$  Å<sup>3</sup>,  $Z = 8$ ,  $T = 200.0$  K,  $\mu(\text{CuK}\alpha) = 3.712$  mm<sup>-1</sup>,  $D_{\text{calc}} = 1.624$  g/cm<sup>3</sup>, 12229 reflections measured ( $5.972^\circ \leq 2\theta \leq 136.506^\circ$ ), 2838 unique ( $R_{\text{int}} = 0.0563$ ,  $R_{\text{sigma}} = 0.0443$ ) which were used in all calculations. The final  $R_I$  was 0.0400 ( $I > 2\sigma(I)$ ) and  $wR_2$  was 0.1123 (all data).

#### Refinement model description

---

Number of restraints - 1, number of constraints - unknown.

Details:

1. Fixed Uiso

At 1.2 times of:

All C(H) groups, All O(H) groups

At 1.5 times of:

All C(H,H,H) groups

2. Restrained distances

O2-H2

0.84 with sigma of 0.02

3. a Aromatic/amide H refined with riding coordinates:

C2(H2A), C3(H3), C4(H4), C5(H5), C9(H9), C11(H11), C15(H15), C16(H16), C18(H18)

3. b Idealised Me refined as rotating group:

C12(H12A,H12B,H12C)

This report has been created with Olex2, compiled on 2020.02.04 svn.rd84adfe8 for OlexSys. Please let us know if there are any errors or if you would like to have additional features.

**Table S2 Crystal data and structure refinement for 3ka**

|                                    |                                                                 |
|------------------------------------|-----------------------------------------------------------------|
| Identification code                | <b>3ka</b>                                                      |
| Empirical formula                  | C <sub>19</sub> H <sub>13</sub> BrN <sub>2</sub> O <sub>2</sub> |
| Formula weight                     | 381.22                                                          |
| Temperature/K                      | 200.0                                                           |
| Crystal system                     | orthorhombic                                                    |
| Space group                        | Pbca                                                            |
| a/Å                                | 12.3418(5)                                                      |
| b/Å                                | 8.5375(4)                                                       |
| c/Å                                | 29.6015(12)                                                     |
| α/°                                | 90                                                              |
| β/°                                | 90                                                              |
| γ/°                                | 90                                                              |
| Volume/Å <sup>3</sup>              | 3119.1(2)                                                       |
| Z                                  | 8                                                               |
| ρ <sub>calc</sub> /cm <sup>3</sup> | 1.624                                                           |
| μ/mm <sup>-1</sup>                 | 3.712                                                           |
| F(000)                             | 1536.0                                                          |
| Crystal size/mm <sup>3</sup>       | 0.48 × 0.15 × 0.05                                              |
| Radiation                          | CuKα (λ = 1.54178)                                              |
| 2θ range for data collection/°     | 5.972 to 136.506                                                |
| Index ranges                       | -14 ≤ h ≤ 14, -7 ≤ k ≤ 10, -35 ≤ l ≤ 29                         |
| Reflections collected              | 12229                                                           |
| Independent reflections            | 2838 [R <sub>int</sub> = 0.0563, R <sub>sigma</sub> = 0.0443]   |
| Data/restraints/parameters         | 2838/1/221                                                      |

Goodness-of-fit on  $F^2$  1.044  
 Final R indexes [ $I \geq 2\sigma(I)$ ]  $R_1 = 0.0400$ ,  $wR_2 = 0.1052$   
 Final R indexes [all data]  $R_1 = 0.0488$ ,  $wR_2 = 0.1123$   
 Largest diff. peak/hole /  $e \text{ \AA}^{-3}$  0.50/-0.54

## 7.2 X-ray Crystal Structure Information of Compound 4aa

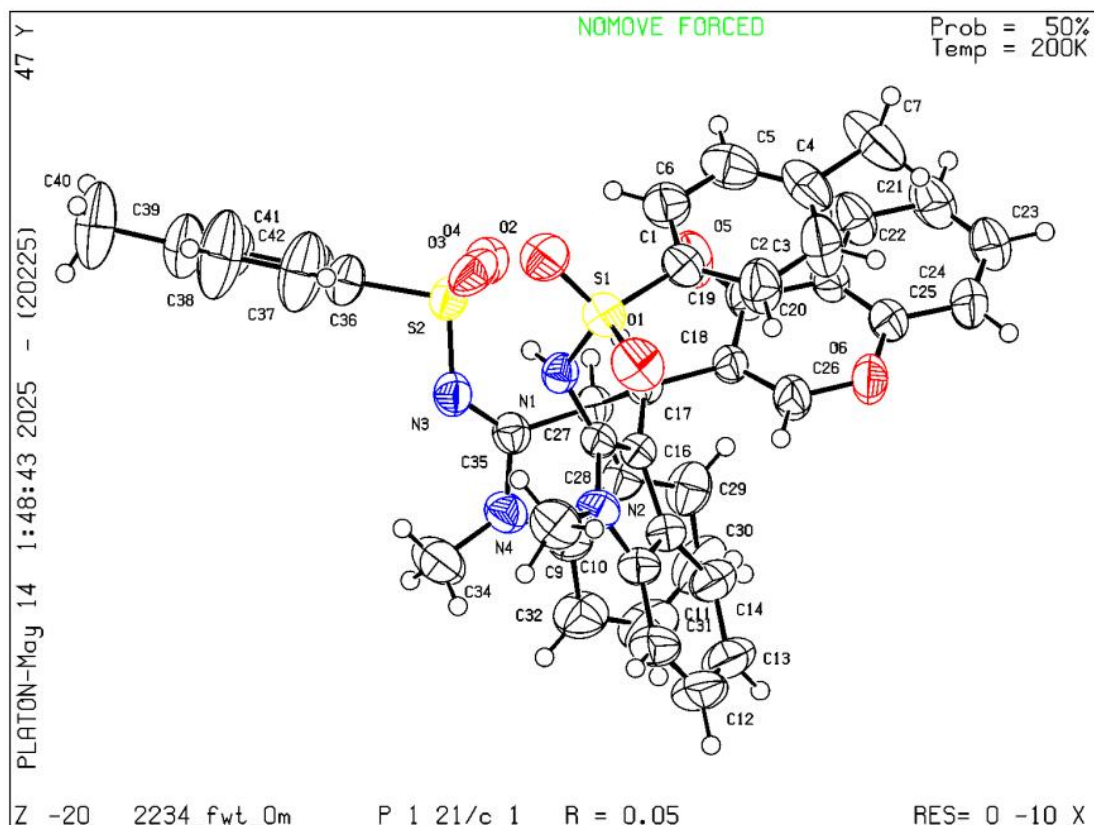

4aa

**Sample preparation:** A small amount of sample **4aa** was dissolved in DCM in a vial, and then petroleum ether was dripped into the solution. Then the vial was sealed with a thin layer of parafilm and some holes were made on top of parafilm. The solvent volatilized slowly at room temperature to afford the single crystal of **4aa**.

### Experimental Section

Single crystals of  $C_{42}H_{36}N_4O_6S_2$  [**4aa**] were [ ]. A suitable crystal was selected and [ ] on a Bruker APEX-II CCD diffractometer. The crystal was kept at 200.0 K during data collection. Using Olex2 [1], the structure was solved with the SHELXT [2] structure solution program using Intrinsic Phasing and refined with the SHELXL [3] refinement package using Least Squares minimisation.

1. Dolomanov, O.V., Bourhis, L.J., Gildea, R.J, Howard, J.A.K. & Puschmann, H. (2009), *J. Appl. Cryst.* 42, 339-341.

2. Sheldrick, G.M. (2015). *Acta Cryst.* A71, 3-8.

3. Sheldrick, G.M. (2015). *Acta Cryst.* C71, 3-8.

Crystal structure determination of [**4aa**]

**Crystal Data** for  $C_{42}H_{36}N_4O_6S_2$  ( $M = 756.87$  g/mol): monoclinic, space group  $P2_1/c$  (no. 14),  $a = 17.0112(5)$  Å,  $b = 10.9345(3)$  Å,  $c = 23.5496(6)$  Å,  $V = 4244.8(2)$  Å<sup>3</sup>,  $Z = 4$ ,  $T = 200.0$  K,  $\mu(\text{CuK}\alpha) =$

---

1.532 mm<sup>-1</sup>,  $D_{calc} = 1.184$  g/cm<sup>3</sup>, 21774 reflections measured ( $5.36^\circ \leq 2\theta \leq 136.932^\circ$ ), 7736 unique ( $R_{int} = 0.0602$ ,  $R_{sigma} = 0.0628$ ) which were used in all calculations. The final  $R_I$  was 0.0527 ( $I > 2\sigma(I)$ ) and  $wR_2$  was 0.1570 (all data).

### Refinement model description

Number of restraints - 1, number of constraints - unknown.

Details:

1. Fixed Uiso

At 1.2 times of:

All C(H) groups, All O(H) groups

At 1.5 times of:

All C(H,H,H) groups

2. Restrained distances

N1-H1

0.88 with sigma of 0.02

3. a A Ternary CH refined with riding coordinates

C17(H17), C27(H27)

3. b Aromatic/amide H refined with riding coordinates:

C2(H2), C3(H3), C5(H5), C6(H6), C11(H11), C12(H12), C13(H13), C14(H14),

C21(H21), C22(H22), C23(H23), C24(H24), C26(H26), C29(H29), C30(H30), C31(H31),

C32(H32), C37(H37), C38(H38), C41(H41), C42(H42)

3. c Idealised Me refined as rotating group:

C7(H7A,H7B,H7C), C9(H9A,H9B,H9C), C34(H34A,H34B,H34C), C40(H40A,H40B,H40C)

This report has been created with Olex2, compiled on 2020.11.12 svn.r5f609507 for OlexSys. Please let us know if there are any errors or if you would like to have additional features.

### Table S3 Crystal data and structure refinement for 4aa

|                                |                                                                              |
|--------------------------------|------------------------------------------------------------------------------|
| Identification code            | <b>4aa</b>                                                                   |
| Empirical formula              | C <sub>42</sub> H <sub>36</sub> N <sub>4</sub> O <sub>6</sub> S <sub>2</sub> |
| Formula weight                 | 756.87                                                                       |
| Temperature/K                  | 200.0                                                                        |
| Crystal system                 | monoclinic                                                                   |
| Space group                    | P2 <sub>1</sub> /c                                                           |
| a/Å                            | 17.0112(5)                                                                   |
| b/Å                            | 10.9345(3)                                                                   |
| c/Å                            | 23.5496(6)                                                                   |
| $\alpha$ /°                    | 90                                                                           |
| $\beta$ /°                     | 104.293(2)                                                                   |
| $\gamma$ /°                    | 90                                                                           |
| Volume/Å <sup>3</sup>          | 4244.8(2)                                                                    |
| Z                              | 4                                                                            |
| $\rho_{calc}$ /cm <sup>3</sup> | 1.184                                                                        |
| $\mu$ /mm <sup>-1</sup>        | 1.532                                                                        |
| F(000)                         | 1584.0                                                                       |

|                                             |                                                               |
|---------------------------------------------|---------------------------------------------------------------|
| Crystal size/mm <sup>3</sup>                | 0.41 × 0.18 × 0.05                                            |
| Radiation                                   | CuKα (λ = 1.54178)                                            |
| 2θ range for data collection/°              | 5.36 to 136.932                                               |
| Index ranges                                | -20 ≤ h ≤ 20, -10 ≤ k ≤ 13, -27 ≤ l ≤ 28                      |
| Reflections collected                       | 21774                                                         |
| Independent reflections                     | 7736 [R <sub>int</sub> = 0.0602, R <sub>sigma</sub> = 0.0628] |
| Data/restraints/parameters                  | 7736/1/494                                                    |
| Goodness-of-fit on F <sup>2</sup>           | 1.042                                                         |
| Final R indexes [I ≥ 2σ (I)]                | R <sub>1</sub> = 0.0527, wR <sub>2</sub> = 0.1459             |
| Final R indexes [all data]                  | R <sub>1</sub> = 0.0703, wR <sub>2</sub> = 0.1570             |
| Largest diff. peak/hole / e Å <sup>-3</sup> | 0.34/-0.23                                                    |

### 7.3 X-ray Crystal Structure Information of Compound 5aa

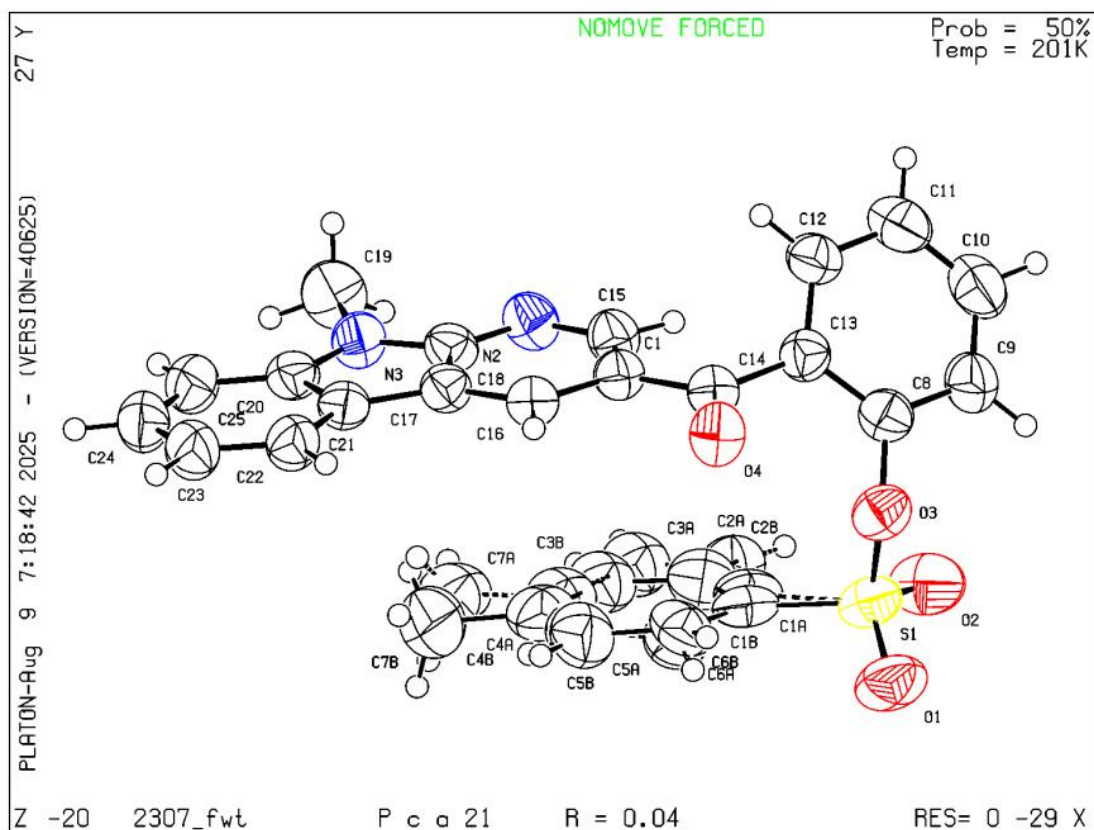

#### 5aa

**Sample preparation:** A small amount of sample **5aa** was dissolved in DCM in a vial, and then petroleum ether was dripped into the solution. Then the vial was sealed with a thin layer of parafilm and some holes were made on top of parafilm. The solvent volatilized slowly at room temperature to afford the single crystal of **5aa**.

#### Experimental Section

Single crystals of C<sub>26</sub>H<sub>20</sub>N<sub>2</sub>O<sub>4</sub>S [**5aa**] were []. A suitable crystal was selected and [] on a Bruker APEX-II CCD diffractometer. The crystal was kept at 201.0 K during data collection. Using Olex2 [1],

---

the structure was solved with the SHELXT [2] structure solution program using Intrinsic Phasing and refined with the SHELXL [3] refinement package using Least Squares minimisation.

1. Dolomanov, O.V., Bourhis, L.J., Gildea, R.J., Howard, J.A.K. & Puschmann, H. (2009), *J. Appl. Cryst.* 42, 339-341.

2. Sheldrick, G.M. (2015). *Acta Cryst.* A71, 3-8.

3. Sheldrick, G.M. (2015). *Acta Cryst.* C71, 3-8.

Crystal structure determination of [**5aa**]

**Crystal Data** for C<sub>26</sub>H<sub>20</sub>N<sub>2</sub>O<sub>4</sub>S (*M* = 456.50 g/mol): orthorhombic, space group Pca2<sub>1</sub> (no. 29), *a* = 21.0365(12) Å, *b* = 7.9263(4) Å, *c* = 13.4019(7) Å, *V* = 2234.7(2) Å<sup>3</sup>, *Z* = 4, *T* = 201.0 K, μ(CuKα) = 1.590 mm<sup>-1</sup>, *D*<sub>calc</sub> = 1.357 g/cm<sup>3</sup>, 11043 reflections measured (10.692° ≤ 2θ ≤ 136.578°), 3900 unique (*R*<sub>int</sub> = 0.0521, *R*<sub>sigma</sub> = 0.0543) which were used in all calculations. The final *R*<sub>I</sub> was 0.0445 (*I* > 2σ(*I*)) and *wR*<sub>2</sub> was 0.1148 (all data).

### Refinement model description

Number of restraints - 339, number of constraints - unknown.

Details:

#### 1. Twinned data refinement

Scales: 0.96(4)

0.04(4)

#### 2. Fixed Uiso

At 1.2 times of:

All C(H) groups

At 1.5 times of:

All C(H,H,H) groups

#### 3. Restrained distances

C3A-C4A ≈ C3B-C4B ≈ C5A-C4A ≈ C5B-C4B ≈ C6B-C5B ≈ C6A-C5A

≈ C1B-C6B ≈ C1A-C6A

≈ C1B-C2B ≈ C1A-C2A ≈ C2B-C3B ≈ C2A-C3A

with sigma of 0.02

S1-C1A ≈ S1-C1B

with sigma of 0.02

C4A-C7A ≈ C4B-C7B

with sigma of 0.02

#### 4. Rigid bond restraints

S1, C1A, C1B, C2A, C2B, C3A, C3B, C4A, C4B, C5A, C5B, C6A, C6B, C7A, C7B

with sigma for 1-2 distances of 0.04 and sigma for 1-3 distances of 0.08

#### 5. Uiso/Uanisotropy restraints and constraints

S1 ≈ C1A ≈ C1B ≈ C2A ≈ C2B ≈ C3A ≈ C3B ≈ C4A ≈

C4B ≈ C5A ≈ C5B ≈ C6A ≈ C6B ≈ C7A ≈ C7B: within 2A with

sigma of 0.02 and sigma for terminal atoms of 0.04 within 2A

#### 6. Others

Sof(C1B)=Sof(C2B)=Sof(H2B)=Sof(C3B)=Sof(H3B)=Sof(C4B)=Sof(C5B)=Sof(H5B)=

Sof(C6B)=Sof(H6B)=Sof(C7B)=Sof(H7BC)=Sof(H7BA)=Sof(H7BB)=1-FVAR(1)

Sof(C1A)=Sof(C2A)=Sof(H2A)=Sof(C3A)=Sof(H3A)=Sof(C4A)=Sof(C5A)=Sof(H5A)=

Sof(C6A)=Sof(H6A)=Sof(C7A)=Sof(H7AC)=Sof(H7AA)=Sof(H7AB)=FVAR(1)

#### 7. a Aromatic/amide H refined with riding coordinates:

---

C2A(H2A), C2B(H2B), C3A(H3A), C3B(H3B), C5A(H5A), C5B(H5B), C6A(H6A),  
C6B(H6B), C9(H9), C10(H10), C11(H11), C12(H12), C16(H15), C17(H16), C26(H22),  
C25(H23), C24(H24), C23(H25)

7. b Idealised Me refined as rotating group:

C7A(H7AC,H7AA,H7AB), C7B(H7BC,H7BA,H7BB), C22(H19A,H19B,H19C)

This report has been created with Olex2, compiled on 2020.11.12 svn.r5f609507 for OlexSys. Please let us know if there are any errors or if you would like to have additional features.

#### Table S4 Crystal data and structure refinement for 5aa

|                                             |                                                                 |
|---------------------------------------------|-----------------------------------------------------------------|
| Identification code                         | <b>5aa</b>                                                      |
| Empirical formula                           | C <sub>26</sub> H <sub>20</sub> N <sub>2</sub> O <sub>4</sub> S |
| Formula weight                              | 456.50                                                          |
| Temperature/K                               | 201.0                                                           |
| Crystal system                              | orthorhombic                                                    |
| Space group                                 | Pca2 <sub>1</sub>                                               |
| a/Å                                         | 21.0365(12)                                                     |
| b/Å                                         | 7.9263(4)                                                       |
| c/Å                                         | 13.4019(7)                                                      |
| α/°                                         | 90                                                              |
| β/°                                         | 90                                                              |
| γ/°                                         | 90                                                              |
| Volume/Å <sup>3</sup>                       | 2234.7(2)                                                       |
| Z                                           | 4                                                               |
| ρ <sub>calc</sub> /cm <sup>3</sup>          | 1.357                                                           |
| μ/mm <sup>-1</sup>                          | 1.590                                                           |
| F(000)                                      | 952.0                                                           |
| Crystal size/mm <sup>3</sup>                | 0.46 × 0.06 × 0.03                                              |
| Radiation                                   | CuKα (λ = 1.54178)                                              |
| 2θ range for data collection/°              | 10.692 to 136.578                                               |
| Index ranges                                | -24 ≤ h ≤ 25, -9 ≤ k ≤ 8, -16 ≤ l ≤ 16                          |
| Reflections collected                       | 11043                                                           |
| Independent reflections                     | 3900 [R <sub>int</sub> = 0.0521, R <sub>sigma</sub> = 0.0543]   |
| Data/restraints/parameters                  | 3900/339/367                                                    |
| Goodness-of-fit on F <sup>2</sup>           | 1.070                                                           |
| Final R indexes [I ≥ 2σ (I)]                | R <sub>1</sub> = 0.0445, wR <sub>2</sub> = 0.1037               |
| Final R indexes [all data]                  | R <sub>1</sub> = 0.0581, wR <sub>2</sub> = 0.1148               |
| Largest diff. peak/hole / e Å <sup>-3</sup> | 0.20/-0.19                                                      |
| Flack parameter                             | 0.04(4)                                                         |

---

## 8. References

- [1] (a) Z. Lei, F. Xue, B. Wang, S. Wang, Y. Zhang, Y. Xia, W. Jin and C. Liu, *Green Chem.*, 2023, **25**, 348. (b) H. Liu, A. M. Z. Slawin and A. D. Smith, *Org. Lett.*, 2020, **22**, 1301. (c) S. Pervaram, D. Ashok, C. V. R. Reddy, M. Sarasija and B. A. Rao, *Russ. J. Gen. Chem.*, 2018, **88**, 566. (d) H. Dückert, V. Khedkar, H. Waldmann and K. Kumar, *Chem. Eur. J.*, 2011, **17**, 5130. (e) X. Peng, X. Zhang, S. Li, Y. Lu, L. Lan and C. Yang, *Org. Chem. Front.*, 2019, **6**, 1775.
- [2] G. Shan, X. Han, Y. Lin, S. Yu and Y. Rao, *Org. Biomol. Chem.*, 2013, **11**, 2318.
- [3] J. Li, T. S. Rush III, W. Li, D. DeVincentis, X. Du, Y. Hu, J. R. Thomason, J. S. Xiang, J. S. Skotnicki, S. Tam, K. M. Cunningham, P. S. Chockalingam, E. A. Morris and J. I. Levin, *Bioorg. Med. Chem. Lett.*, 2005, **15**, 4961.
- [4] I.-T. Hwang, S.-A. Lee, J.-S. Hwang and K.-I. Lee, *Molecules*, 2011, **16**, 6313.
- [5] D. Wang and S. Cui, *Tetrahedron*, 2015, **71**, 8511.
